# Supplementary material
Source: PubMed Central journal article supplement (PMC6391108)
Supplement: jci-129-121987-s182.pdf [file jci-129-121987-s182.pdf]

## Supplemental Information

### Supplemental Figures and Figure legends

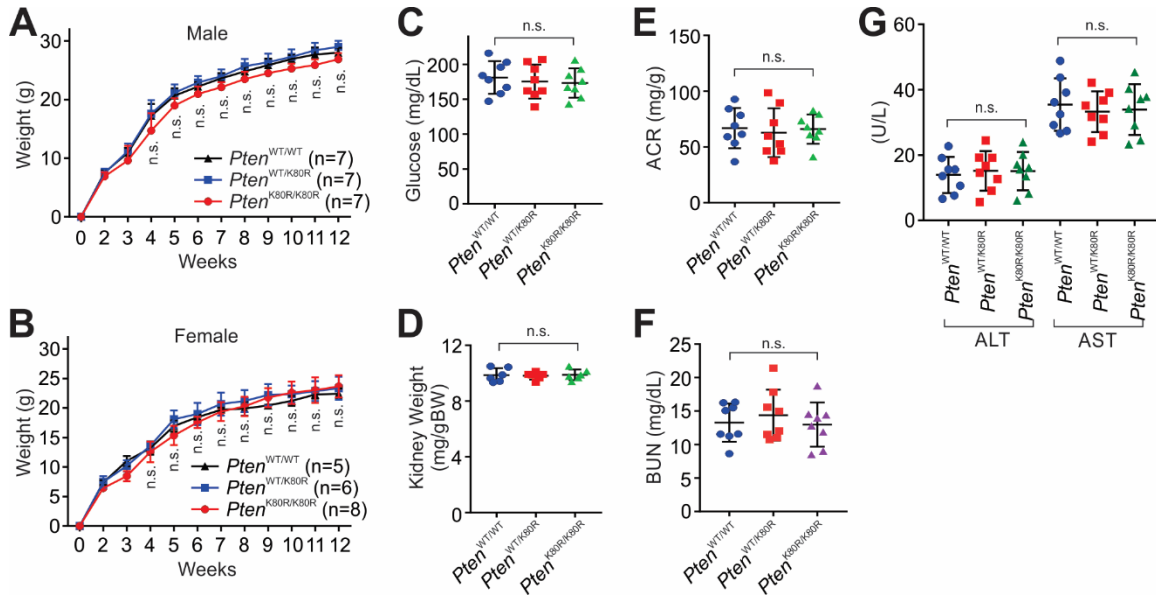

### Supplemental Figure 1. Characterization of phenotype of $Pten^{K80R/K80R}$ animals.

(A) Body weight of male  $Pten^{WT/WT}$ ,  $Pten^{WT/K80R}$ ,  $Pten^{K80R/K80R}$  animals (n=7, 7, 7). (B) Body weight of female  $Pten^{WT/WT}$ ,  $Pten^{WT/K80R}$ ,  $Pten^{K80R/K80R}$  animals (n=5, 6, 8). (C-G) Blood glucose level (n=8, 8, 8) (C), kidney weight was normalized by body weight (n=6, 6, 6) (D), urinary albumin to creatinine ratio (ACR) (n=8, 8, 8) (E), blood urea nitrogen (BUN) (n=8, 8, 8) (F) or serum alanine transaminase (ALT) and aspartate aminotransferase (AST) level (n=8, 8, 8) of male and female  $Pten^{WT/WT}$ ,  $Pten^{WT/K80R}$ ,  $Pten^{K80R/K80R}$  animals. All error bars, SD, n.s.,  $p > 0.05$ , one-way ANOVA.

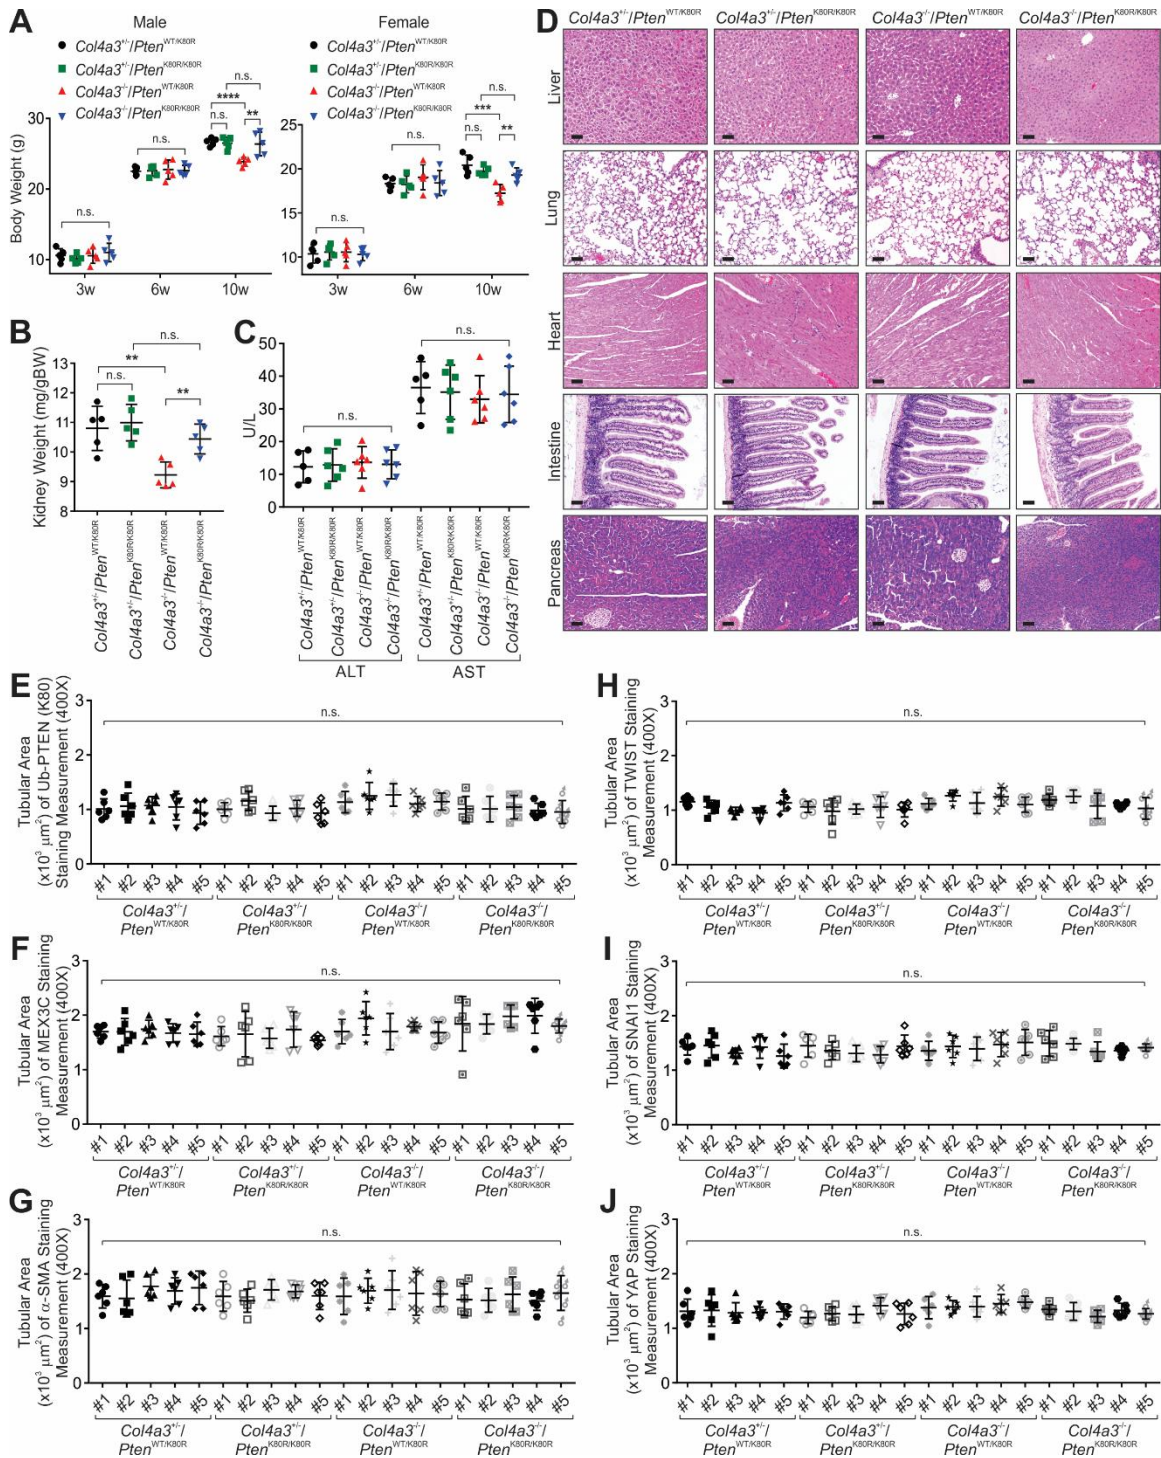

**Supplemental Figure 2. Characterization of phenotype of *Col4a3/Pten K80R* animals.**

(A) Body weight of male (left) and female (right) *Col4a3/Pten K80R* animals (n=5, 5, 5, 5). (B, C) Normalized kidney weight (n=5, 5, 5, 5) (B) or serum ALT and AST levels (n=5,

5, 5, 5) of  $Col4a3^{+/-}/Pten^{WT/K80R}$ ,  $Col4a3^{+/-}/Pten^{K80R/K80R}$ ,  $Col4a3^{-/-}/Pten^{WT/K80R}$  and  $Col4a3^{-/-}/Pten^{K80R/K80R}$  animals. **(D)** H&E staining of liver, lung, heart, intestine and pancreas of  $Col4a3^{+/-}/Pten^{WT/K80R}$ ,  $Col4a3^{+/-}/Pten^{K80R/K80R}$ ,  $Col4a3^{-/-}/Pten^{WT/K80R}$  or  $Col4a3^{-/-}/Pten^{K80R/K80R}$  animals (male and female). Scale bar: 100  $\mu$ m. **(E-J)** Tubule area of measurement of Ub-Pten (K80) (E), MEX3C (F),  $\alpha$ -SMA (G), TWIST (H), SNAIL (I) and YAP (J) staining intensity per tubule of  $Col4a3^{+/-}/Pten^{WT/K80R}$ ,  $Col4a3^{+/-}/Pten^{K80R/K80R}$ ,  $Col4a3^{-/-}/Pten^{WT/K80R}$  or  $Col4a3^{-/-}/Pten^{K80R/K80R}$  kidneys. 6 independent area for each animal is shown. Error bars, SD, n=6 independent fields per animal per experimental condition. All error bars, SD, n.s.,  $p>0.05$ ,  $*p<0.05$ ,  $**p<0.01$ ,  $***p<0.001$ , and  $****p<0.0001$ , one-way ANOVA.

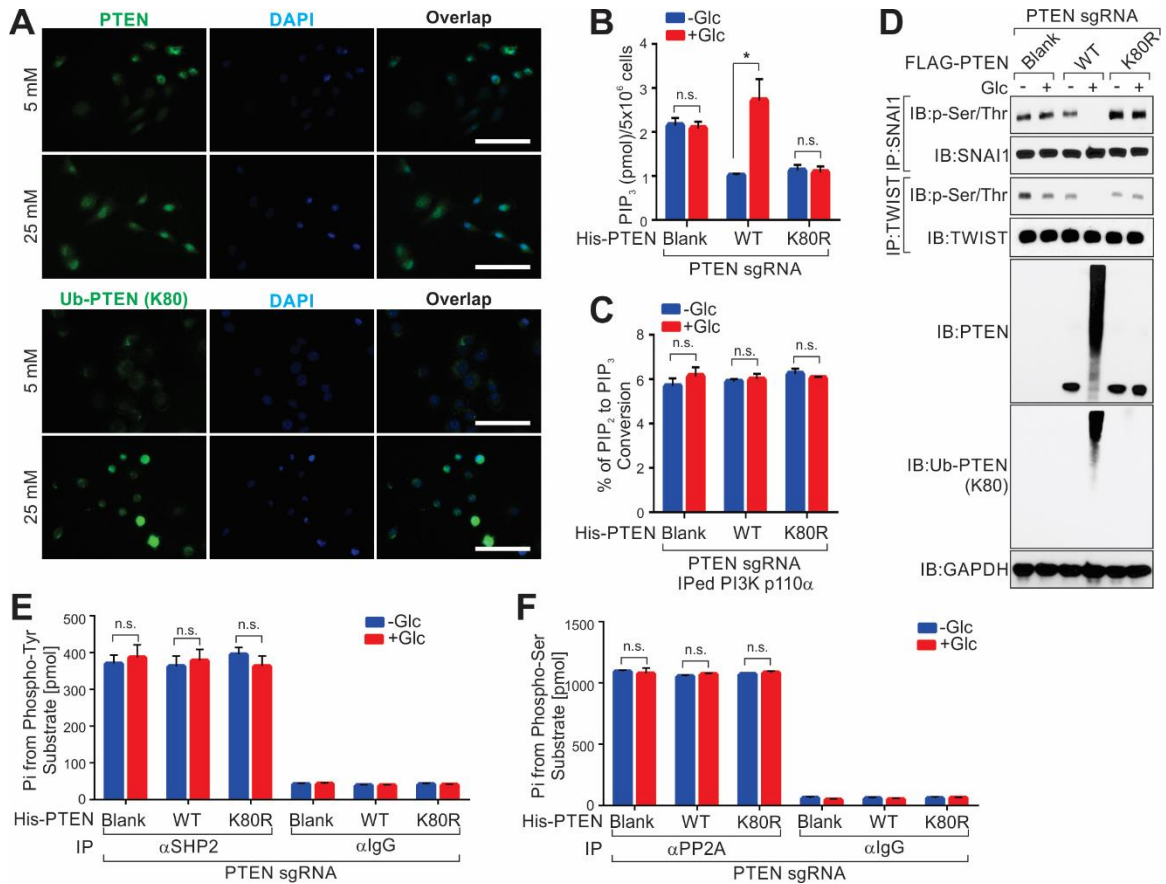

**Supplemental Figure 3. PTEN<sup>K27-polyUb</sup> is required for growth factor-induced EMT.**

(A) Immunofluorescence staining using antibodies targeting indicated antibodies in HK-2 cells subjected with glucose starvation followed by 5 or 25 mM glucose overnight. Scale bar: 100  $\mu$ m. (B-D) Measurement of total cellular PIP<sub>3</sub> (B), measurement of kinase activity of immunoprecipitated PI3K (C) or immunoblotting using indicated antibodies (D) from in PTEN sgRNA-harboring HK2 cells transfected with indicated vectors followed by glucose starvation and stimulation (5 mM or 25 mM, 1 h). (E, F) Measurement of phosphatase activity of immunoprecipitated SHP2 (E) and PP2A (F) from PTEN sgRNA-harboring HK2 cells transfected with indicated vectors followed by glucose starvation and stimulation (5mM or 25mM, 1 hr), using p-Tyr (E) or p-Ser (F) as substrates respectively. All error bars, S.E.M n.s.,  $p > 0.05$ ,  $*p < 0.05$ , Student's t-test.

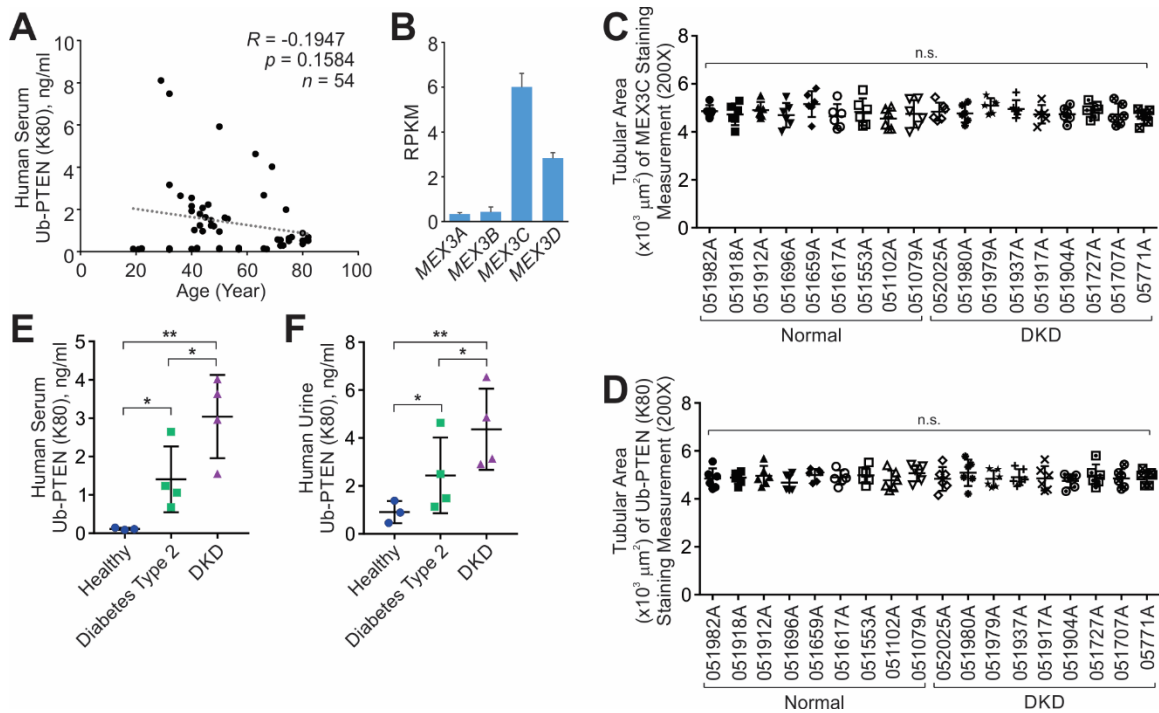

**Supplemental Figure 4. Characterization of serum PTEN<sup>K27-polyUb</sup> in diabetic kidney disease.**

(A) Pearson's correlation of serum PTEN<sup>K27-polyUb</sup> with age of all donors (n=54 serum, Pearson chi-square test). (B) The expression of MEX family members in kidney tissues; data extracted from RNA-seq - The Human Protein Atlas, Error bars, S.E.M. (C, D) Tubule area of measurement of MEX3C (C) and Ub-PTEN (K80) (D) staining intensity per tubule. 6 independent area for each patient is shown. Error bars, SD, n=6 independent field per donor per experimental condition. (n.s.,  $p > 0.05$ , one-way ANOVA). (E, F) Measurement of Ub-PTEN (K80) in serum (E) or urine (F) of healthy donors (n = 3), type 2 diabetic patients (n = 4), or DKD patients (n = 4). Error bars, SD, n = 3, 4, 4 respectively, one-way ANOVA, n.s.  $p > 0.05$ , \* $p < 0.05$ , \*\* $p < 0.01$ , \*\*\* $p < 0.001$ , \*\*\*\* $p < 0.0001$ .

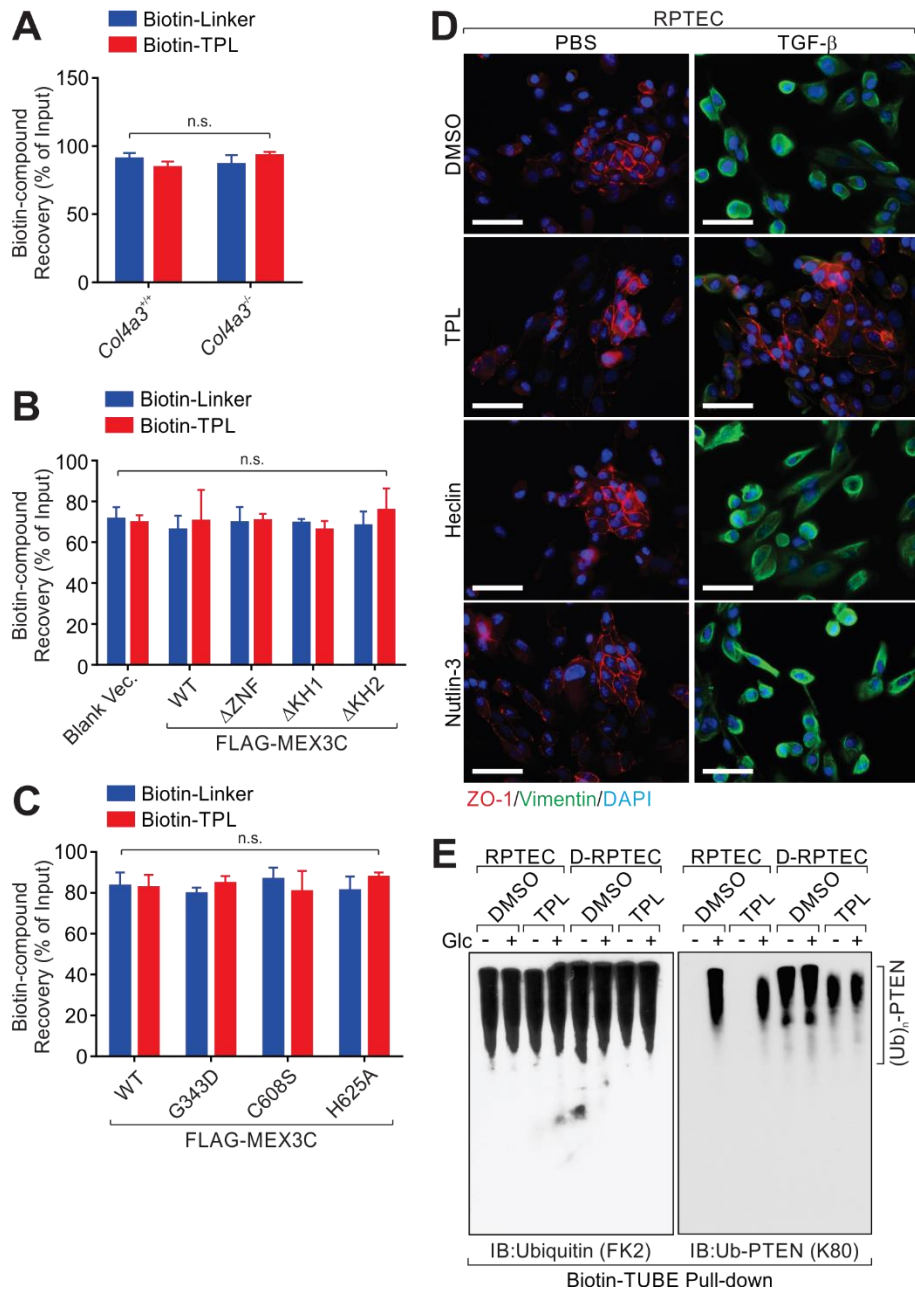

**Supplemental Figure 5. Screen and characterization of MEX3C inhibitor.**

(A-C) Recovery percentile of Biotin-Linker or Biotin-TPL from streptavidin pull-down using *Col4a3*<sup>+/+</sup> or *Col4a3*<sup>-/-</sup> kidney (A), 293T cells expressing indicated expression constructs (B), or recombinant proteins as indicated (C). (D) Immunofluorescence labeling using indicated antibodies of RPTEC cells treated with PBS or TGF- $\beta$  followed by

indicated treatment for 72 hr. Scale bar: 50  $\mu\text{m}$ . (E) Immunoblotting detection using indicated antibodies in RPTEC or D-RPTEC cells treated with DMSO or TPL (1  $\mu\text{M}$ , 2h), with glucose 5 or 25 mM for 1 h. All error bars, SD, n.s.  $p>0.05$ , one-way ANOVA.

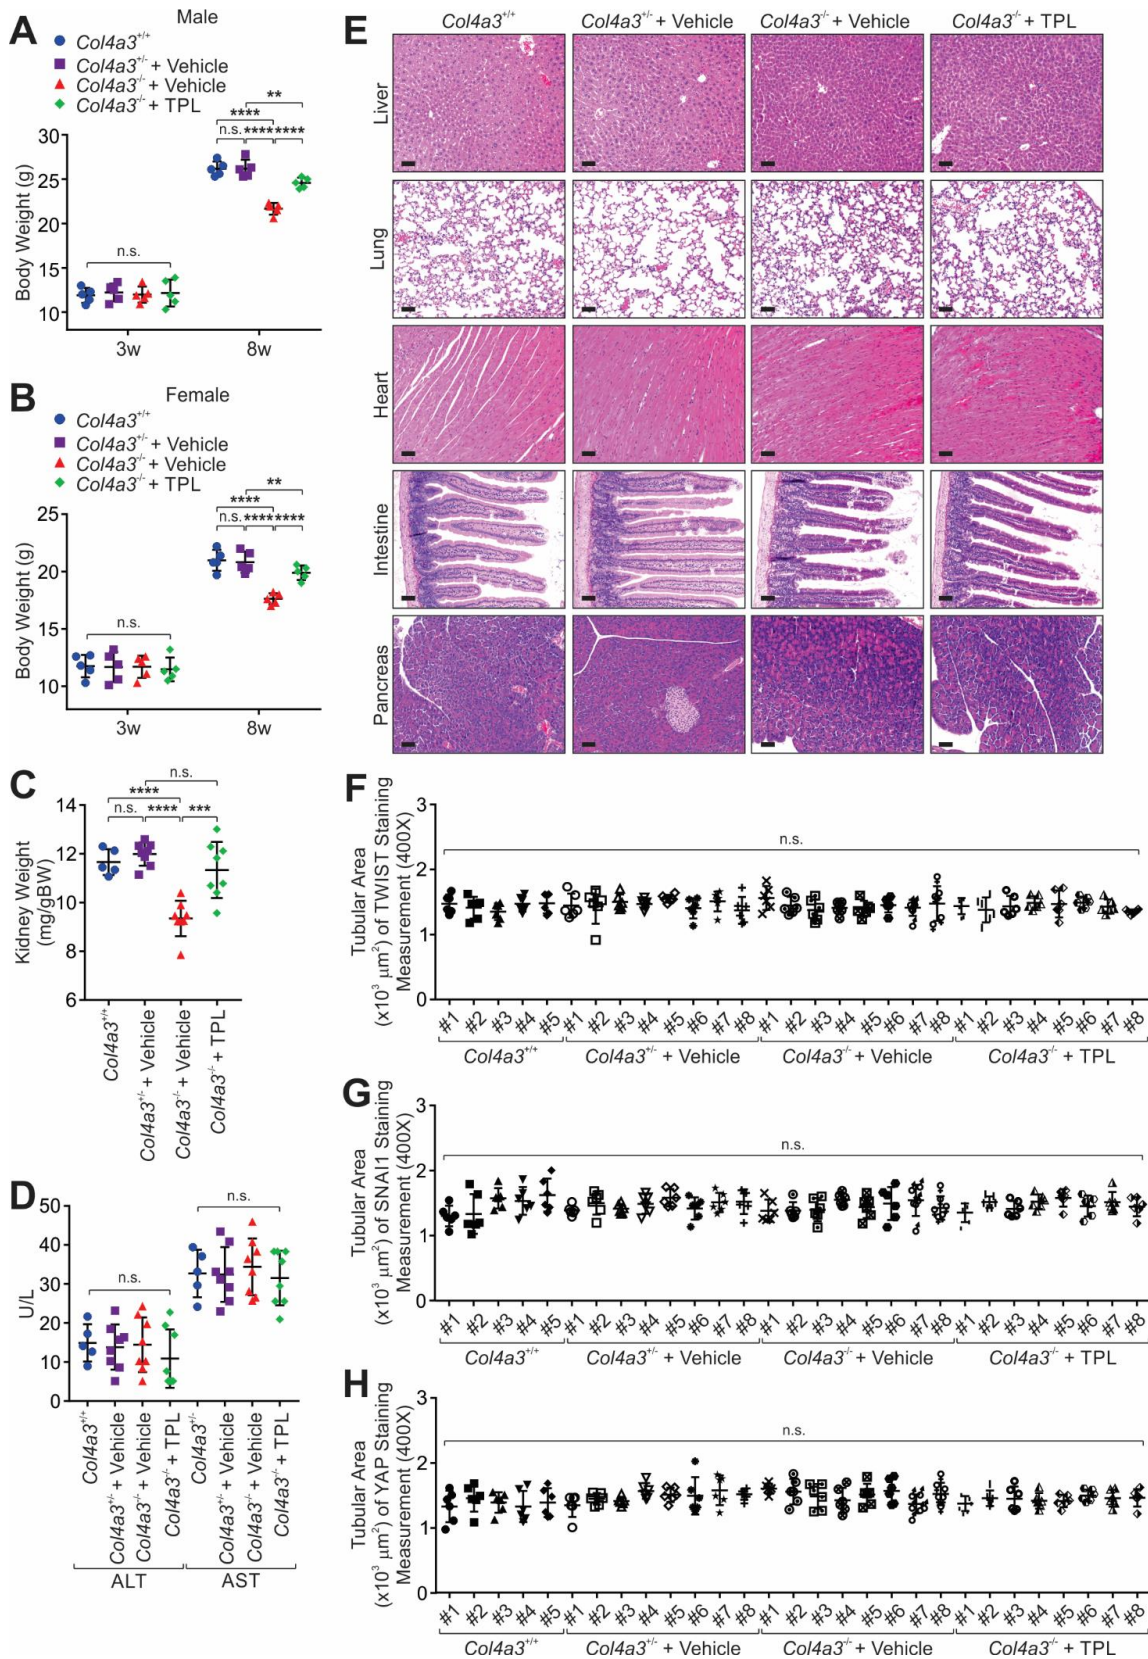

**Supplemental Figure 6. Triptolide reduces *Col4a3* KO-dependent kidney fibrosis.**



**(A, B)** Body weight of male (A) and female (B) *Col4a3<sup>+/+</sup>*, *Col4a3<sup>+/-</sup>* + Vehicle, *Col4a3<sup>-/-</sup>* + Vehicle, and *Col4a3<sup>-/-</sup>* +TPL animals (n=5, 5, 5, 5 animals). **(C-E)** Normalized kidney weight (n=8, 8, 8) (C), serum ALT and AST levels (n=5, 8, 8, 8) (D), or H&E staining of liver, lung, heart, intestine and pancreas (E) of *Col4a3<sup>+/+</sup>*, *Col4a3<sup>+/-</sup>*, *Col4a3<sup>-/-</sup>* + vehicle, *Col4a3<sup>-/-</sup>* + vehicle, or *Col4a3<sup>-/-</sup>* + TPL animals. Scale bar: 100  $\mu$ m. **(F-H)** Tubule area of measurement of TWIST (F), SNAI1 (G) and YAP (H) staining intensity per tubule of *Col4a3<sup>+/+</sup>*, *Col4a3<sup>+/-</sup>* + vehicle, *Col4a3<sup>-/-</sup>* + vehicle, or *Col4a3<sup>-/-</sup>* + TPL kidneys. 6 independent area for each animal is shown, n=5, 8, 8, 8 animals 6 independent fields per animal per experimental condition. All error bars, SD, n.s.,  $p > 0.05$ , \* $p < 0.05$ , \*\* $p < 0.01$ , \*\*\* $p < 0.001$ , and \*\*\*\* $p < 0.0001$ , one-way ANOVA.

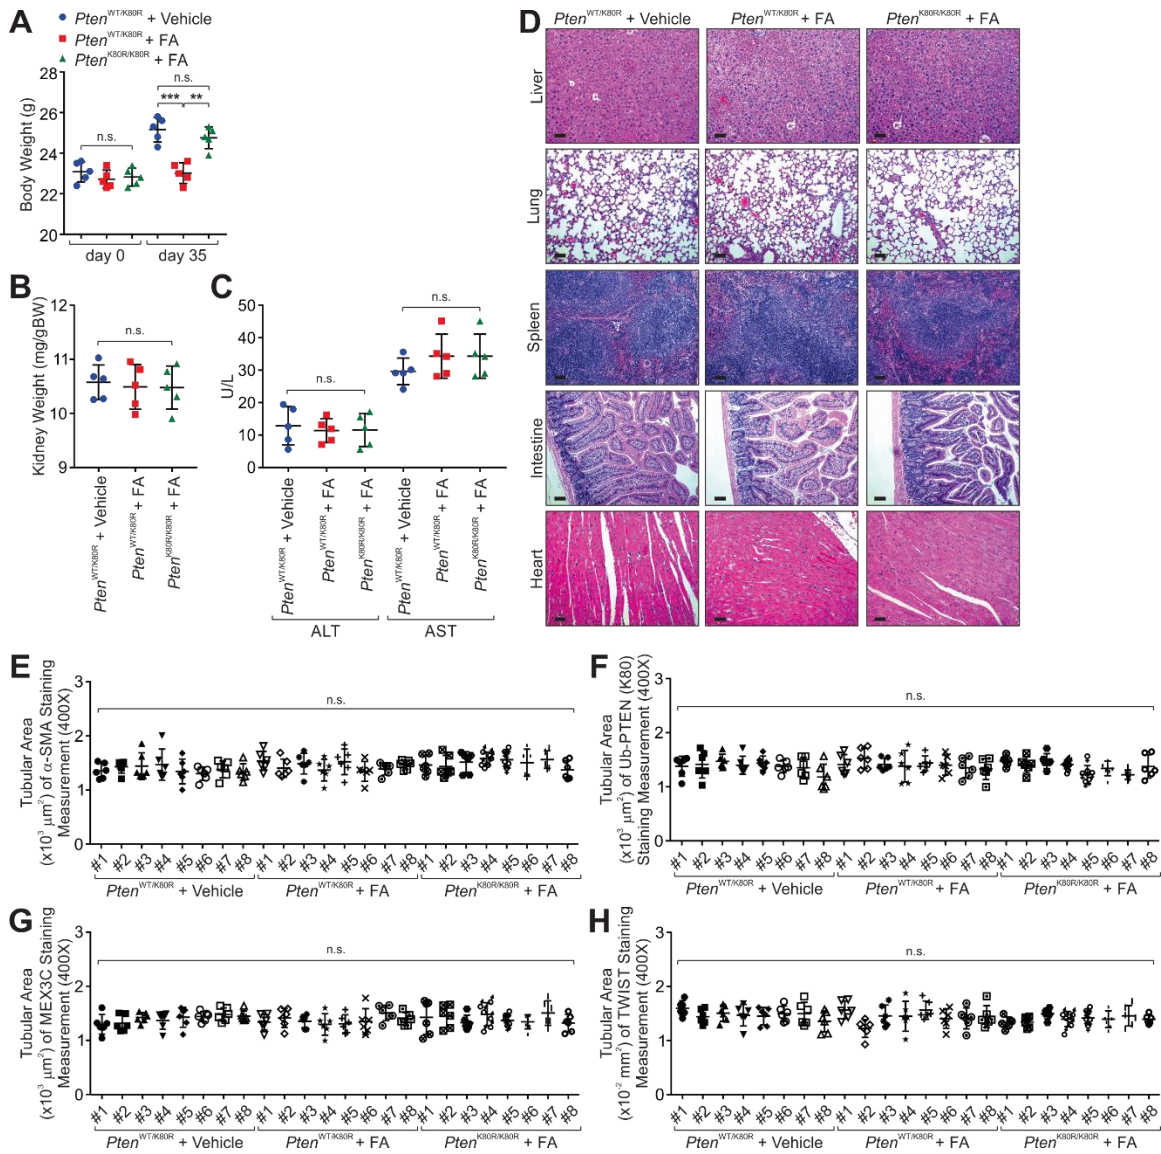

**Supplemental Figure 7. Genetic inhibition of PTEN<sup>K27-polyUb</sup> reduces FA-induced kidney injury.**

(A) Body weight of animals of *Pten*<sup>WT/K80R</sup> with bicarbonate (Bic), *Pten*<sup>K80R/K80R</sup> with FA, and *Pten*<sup>K80R/K80R</sup> with FA injection (n=5, 5, 5 animals). (B-D) Normalized kidney weight (B) serum ALT and AST levels (C), and H&E staining of liver, lung, spleen, intestine and heart (D) of *Pten*<sup>WT/K80R</sup> + vehicle, *Pten*<sup>WT/K80R</sup> + FA, or *Pten*<sup>K80R/K80R</sup> + FA animals (n=5 animals per group). Scale bar: 100 μm. (E-H) Tubule area of measurement of α-SMA (E), Ub-PTEN (K80) (F), MEX3C (G), TWIST (H) staining intensity per tubule of *Pten*<sup>WT/K80R</sup>

+ vehicle,  $Pten^{WT/K80R}$  + FA, or  $Pten^{K80R/K80R}$  + FA kidneys. 6 independent area for each animal is shown, n=8 animals and 6 independent fields per experimental condition. All error bars, SD, n.s.,  $p > 0.05$ ,  $*p < 0.05$ ,  $**p < 0.01$ ,  $***p < 0.001$ , and  $****p < 0.0001$ , one-way ANOVA.

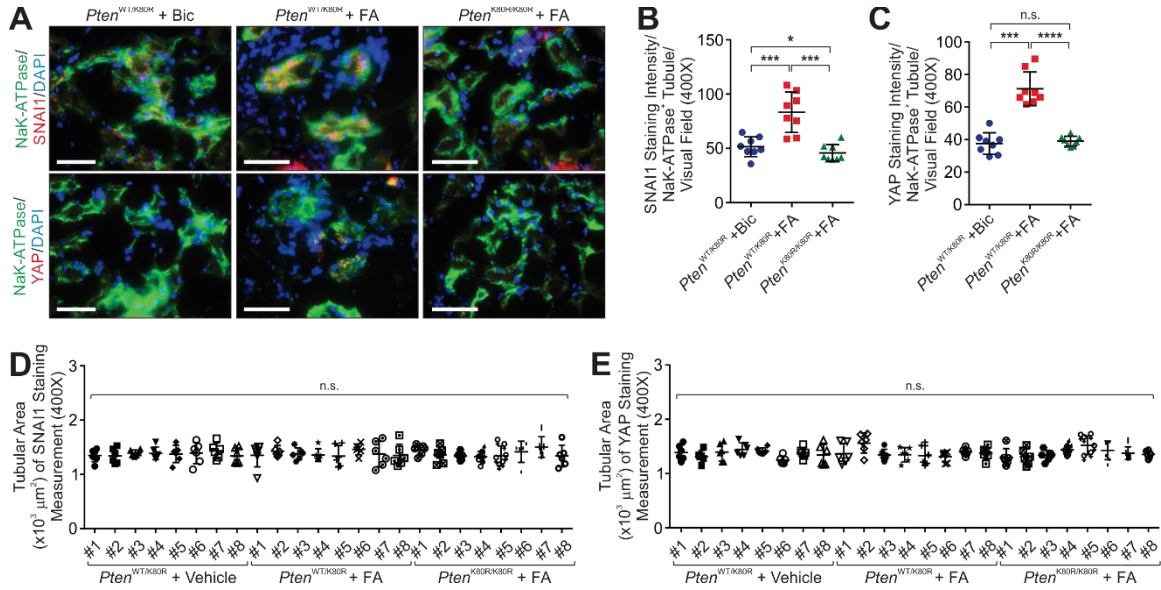

**Supplemental Figure 8. PTEN K80R inhibit expression of EMT regulators upon FA-induced injury.**

(A) Representative images of immunofluorescence staining using indicated antibodies in  $Pten^{WT/K80R}$  with bicarbonate (Bic),  $Pten^{WT/K80R}$  with FA, and  $Pten^{K80R/K80R}$  with FA injection kidneys. Scale bar: 100  $\mu$ m. (B-C) Statistical analysis of staining intensity of SNAIL (B), and YAP (C) per  $\text{Na}^+\text{K}^+$ -ATPase positive tubule per visual field. Error bars, SD, n=8 animals and 6 independent field per animal is calculated. Error bars, SD, one-way ANOVA. (D-E) Tubule area of measurement of SNAIL (D) and YAP (E) staining intensity per tubule of  $Pten^{WT/K80R}$  + vehicle,  $Pten^{WT/K80R}$  + FA, or  $Pten^{K80R/K80R}$  + FA kidneys. 6 independent area for each animal is shown. Error bars, SD, n=8 animals and 6 independent

fields per experimental condition (n.s.,  $p > 0.05$ ,  $*p < 0.05$ ,  $**p < 0.01$ ,  $***p < 0.001$ , and  $****p < 0.0001$ , one-way ANOVA).

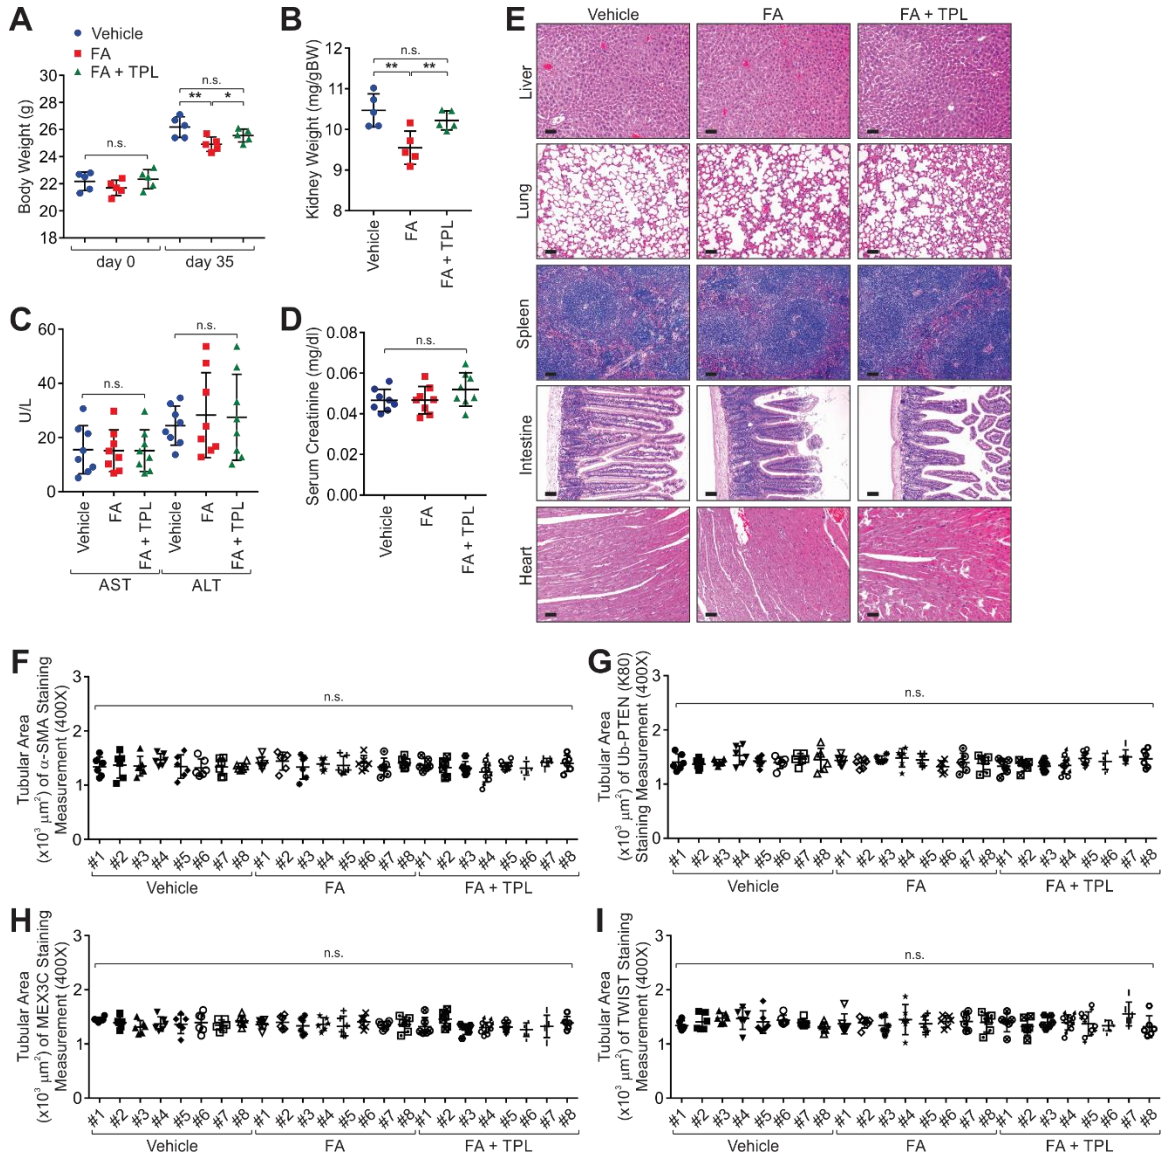

**Supplemental Figure 9.  $PTEN^{K27-polyUb}$  promotes FA-induced renal fibrosis.**

(A) Body weight of C57BL/6J + vehicle, C57BL/6J + FA, or C57BL/6J + FA treated with TPL animals (n=5, 5, 5). (B-E) Normalized kidney weight (n=5, 5, 5) (B), serum ALT and AST levels (n=8, 8, 8) (C), serum creatinine level measured by mass spectrometry (n=8, 8,

8) (D) and H&E staining of liver, lung, spleen, intestine and heart (E) of vehicle, FA, or FA with TPL treatment animals. Scale bar: 100  $\mu\text{m}$ . (F-I) Tubule area of measurement of  $\alpha\text{-SMA}$  (F), Ub-PTEN (K80) (G), MEX3C (H), TWIST (I) staining intensity per tubule of kidneys. 6 independent area for each animal is shown,  $n=8$  animals and 6 independent fields per experimental condition. All error bars, SD, n.s.,  $p>0.05$ ,  $*p<0.05$ ,  $**p<0.01$ ,  $***p<0.001$ , and  $****p<0.0001$ , one-way ANOVA.

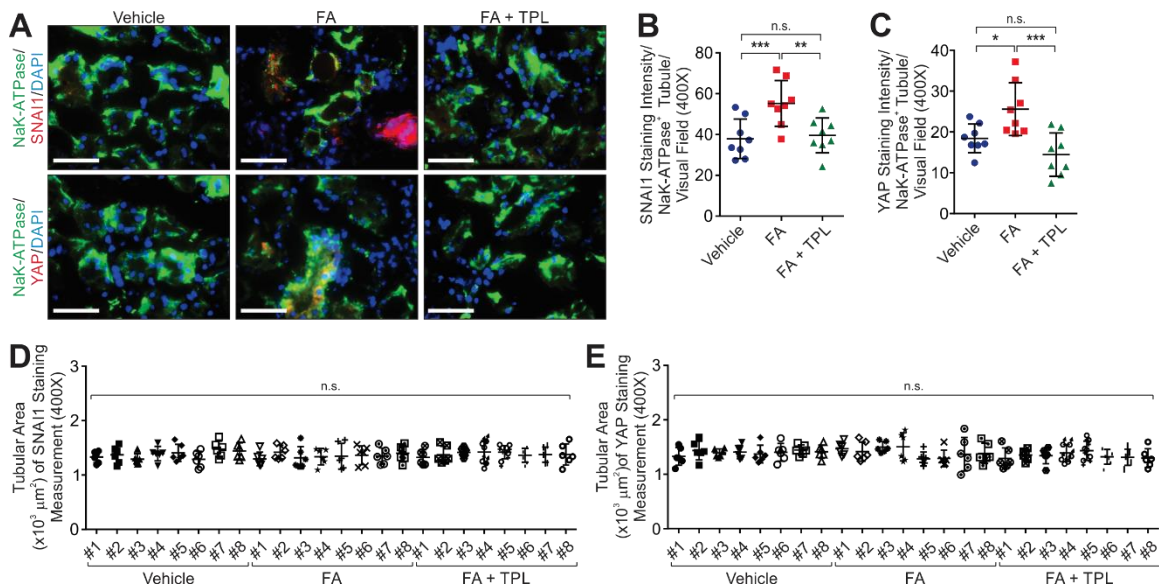

### Supplemental Figure 10. PTEN K80R inhibits FA-induced renal fibrosis.

(A) Representative images of immunofluorescence staining using indicated antibodies in vehicle, FA and FA + TPL kidneys. Scale bar: 100  $\mu\text{m}$ . (B-C) Statistical analysis of staining intensity of SNAIL1 (B), and YAP (C) per  $\text{Na}^+\text{K}^+\text{-ATPase}$  positive tubule per visual field. Error bars, SD,  $n=8$  animals and 6 independent field per animal is calculated (one-way ANOVA). (D-E) Tubule area of measurement of SNAIL1 (D) and YAP (E) staining intensity per tubule of vehicle, FA and FA + TPL kidneys. 6 independent area for each animal is

shown. Error bars, SD, n=8 animals and 6 independent fields per experimental condition (n.s.,  $p>0.05$ ,  $*p<0.05$ ,  $**p<0.01$ ,  $***p<0.001$ , and  $****p<0.0001$ , one-way ANOVA).

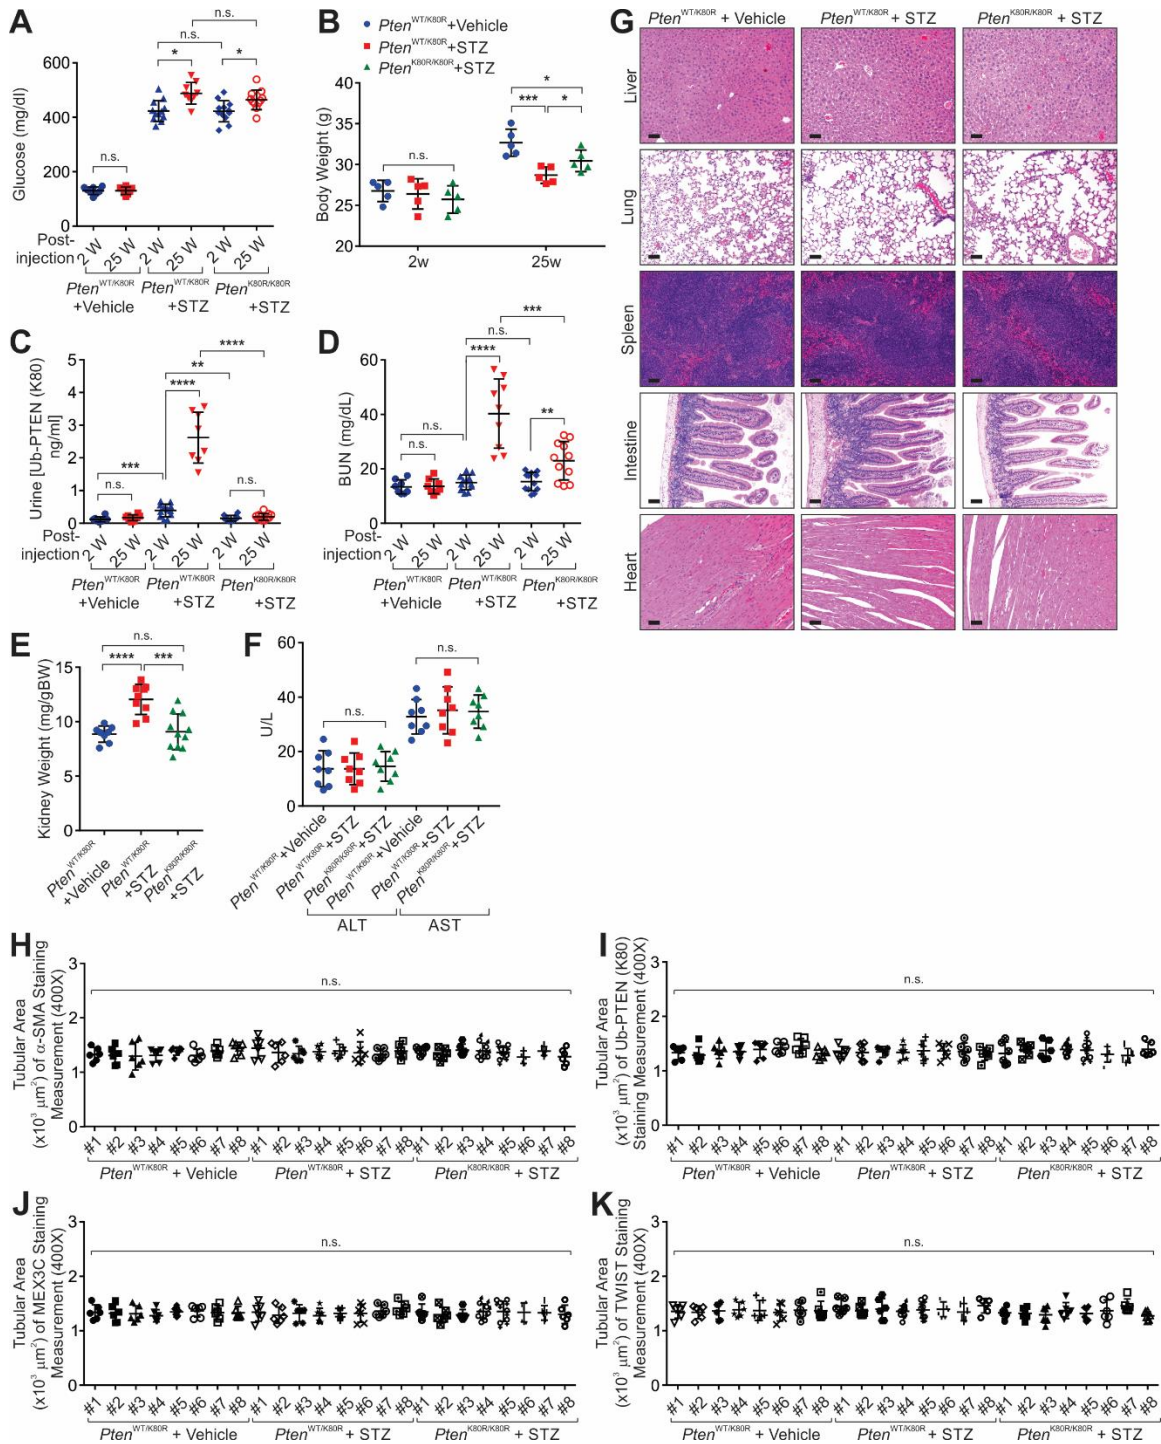

**Supplemental Figure 11. Genetic inhibition of PTEN<sup>K27-polyUb</sup> reduces STZ-induced kidney injury.**

(A) Blood glucose levels of *Pten*<sup>WT/K80R</sup> and *Pten*<sup>K80R/K80R</sup> mice 2 and 25 weeks after STZ injection (n=8, 8, 12, 9, 12, 11). (B-G) Body weight (n=5, 5, 5) (B), urine Ub-PTEN (K80)

level (n=8, 8, 8) (C), measurement of BUN (n=8, 8, 12, 9, 12, 11) (D), normalized kidney weight (n=8, 9, 11) (E), serum ALT and AST levels (n=8, 8, 8) (F) and H&E staining of liver, lung, spleen, intestine and heart (G) in *Pten*<sup>WT/K80R</sup> + vehicle, *Pten*<sup>WT/K80R</sup> + STZ, or *Pten*<sup>K80R/K80R</sup> + STZ animals. Scale bar: 100  $\mu$ m. **(H-K)** The tubule area of measurement of  $\alpha$ -SMA (H), Ub-PTEN (K80) (I), MEX3C (J) and TWIST (K) staining intensity per tubule of *Pten*<sup>WT/K80R</sup> + vehicle, *Pten*<sup>WT/K80R</sup> + STZ, or *Pten*<sup>K80R/K80R</sup> + STZ kidneys. 6 independent area for each animal is shown, n=8 animals and 6 independent fields per experimental condition. All error bars, SD, n.s.,  $p > 0.05$ , \* $p < 0.05$ , \*\* $p < 0.01$ , \*\*\* $p < 0.001$ , and \*\*\*\* $p < 0.0001$ , one-way ANOVA.



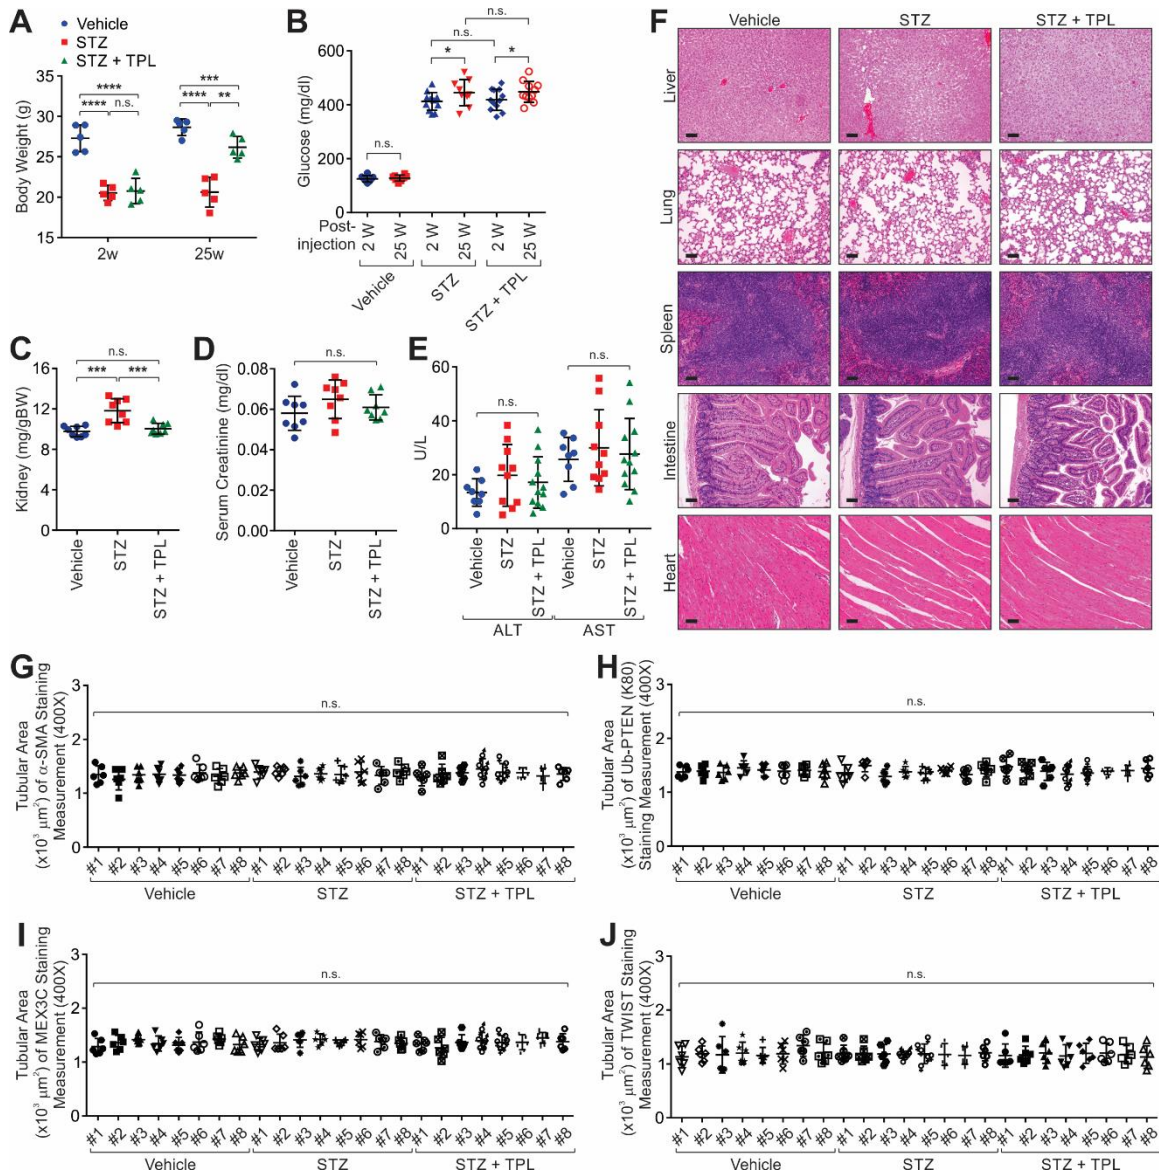

### Supplemental Figure 12. Triptolide reduces STZ-induced kidney damage.

(A) Body weight of *Pten*<sup>WT/K80R</sup> +vehicle injection; *Pten*<sup>WT/K80R</sup> +STZ and *Pten*<sup>K80R/K80R</sup> +STZ animals 2 and 25 weeks after STZ injection (n=5, 5, 5). Error bars, SD, one-way ANOVA. (B-F) Blood glucose levels (n=8, 8, 12, 9, 12, 11) (B), normalized kidney weight (n=8, 8, 8) (C), serum creatinine measured by mass spectrometry (n=8, 8, 8) (D), serum ALT and AST levels (n=5, 5, 5) (E) and H&E staining of liver, lung, spleen, intestine and heart (F) in vehicle, STZ, or STZ + TPL treated animals Scale bar: 100  $\mu\text{m}$ . Error bars, SD,

one-way ANOVA. **(G-J)** Tubule area of measurement of  $\alpha$ -SMA (G), Ub-PTEN (K80) (H), MEX3C (I) and TWIST (J) staining intensity per tubule of vehicle, STZ, or STZ + TPL kidneys. 6 independent area for each animal is shown. Error bars, SD,  $n=8$  animals and 6 independent field per experimental condition. Error bars, SD, one-way ANOVA. (n.s.,  $p>0.05$ ,  $*p<0.05$ ,  $**p<0.01$ ,  $***p<0.001$ , and  $****p<0.0001$ ).

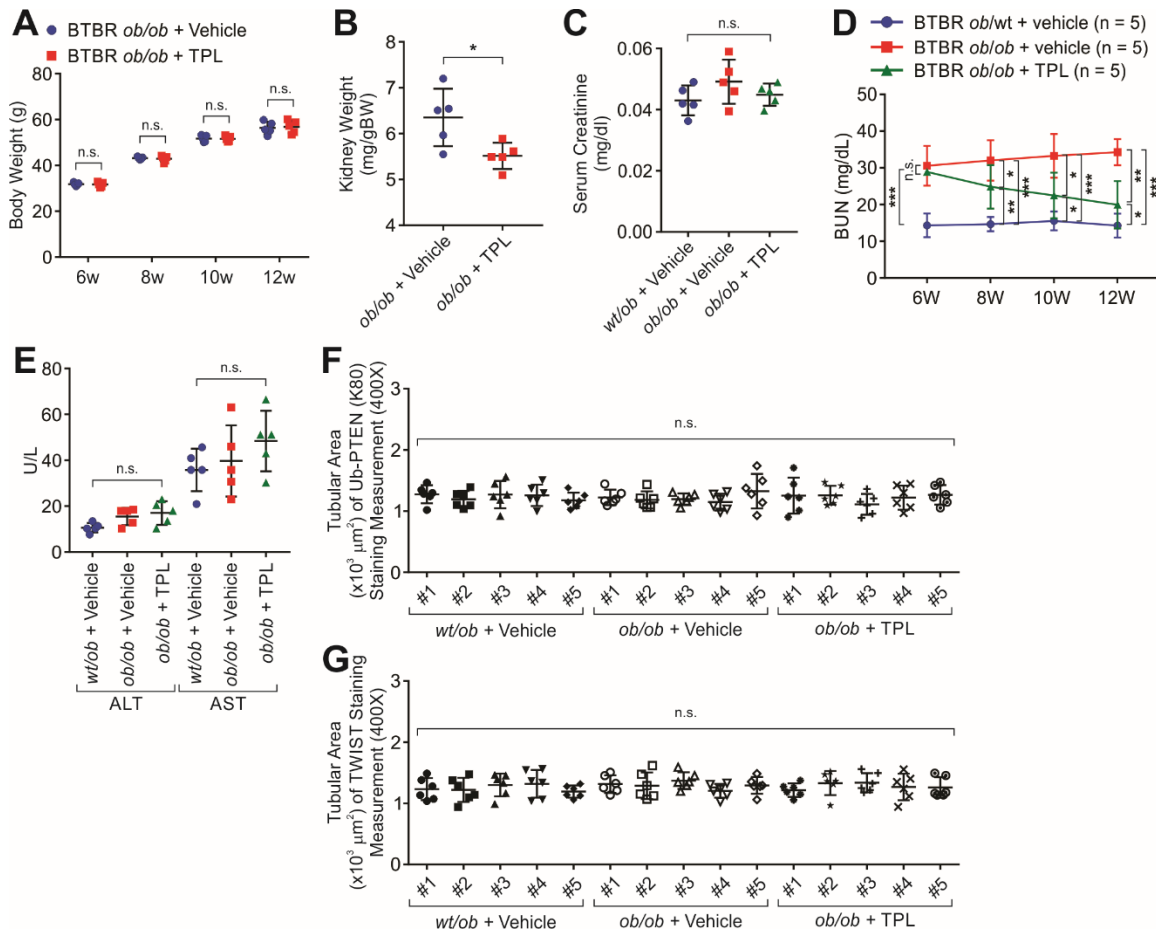

**Supplemental Figure 13. Triptolide alleviates BTBR *ob/ob* kidney damage.**

**(A)** Body weight of male BTBR *ob/ob* + vehicle and BTBR *ob/ob* + TPL animals at age of 6, 8, 10, 12 weeks ( $n=5$ , 5 animals). Error bars, SD, Student's t-test. **(B-C)** Normalized kidney weight (B), serum creatinine level measured by mass spectrometry (C) in BTBR

*ob/wt* + vehicle, BTBR *ob/ob* + vehicle and BTBR *ob/ob* + TPL animals at age of 12 weeks (n=5 animal per group). Error bars, SD, Student's t-test (B) or one-way ANOVA (C). (D) Measurement of BUN in BTBR *ob/wt* + vehicle, BTBR *ob/ob* + vehicle and BTBR *ob/ob* + TPL animals at age of 6, 8, 10, 12 weeks (n=5, 5, 5 animals). Error bars, SD, one-way ANOVA. (E) Measurement of ALT and AST in BTBR *ob/wt* + vehicle, BTBR *ob/ob* + vehicle and BTBR *ob/ob* + TPL animals at age of 12 weeks (n=5 animal per group). Error bars, SD, one-way ANOVA. (F-G) Tubule area of measurement of Ub-PTEN (K80) (F) and TWIST (G) staining intensity per tubule of BTBR *ob/wt* + vehicle, BTBR *ob/ob* + vehicle and BTBR *ob/ob* + TPL kidneys. 6 independent area for each animal is shown, n=5 animals and 6 independent fields per experimental condition. Error bars, SD, one-way ANOVA (n.s.,  $p>0.05$ ,  $*p<0.05$ ).

### **Supplemental Table Legends**

#### **Supplemental Table 1: Clinical information of tissue samples used in this study.**

Serum samples of healthy donors: Human serum samples of healthy donors with BMI and medical information.

Serum Samples of Diabetes: Human serum samples of type 1 or type 2 diabetes with diagnosis and symptom shown.

Serum samples of patients with diabetic nephropathy: Human serum samples of diabetic nephropathy patients, with Blood glucose (BG) levels, diabetic condition and medications shown.

Fresh frozen kidney tissues within normal limits and patients with diabetic nephropathy:

Fresh frozen sections of human kidney tissues within normal limits or diabetic nephropathy with case diagnosis, and cause of death shown.

Urine samples of Healthy Donors: Fresh frozen urine samples of healthy donors, with BMI, eGFR and medical information shown.

Urine samples of DKD patients: Fresh frozen urine samples of patients with diabetic kidney disease, with BMI, Creatinine, eGFR and medical histories shown.

Paired serum and urine samples: Fresh frozen paired serum and urine samples of healthy donor, type 2 diabetes and DKD, with diagnosis, and medical information shown.

**Extended Data Table 2. Summary of protein identification of Biotin-TPL pulldown from fibrotic mouse kidneys.**

Complete mass spectrometry results for Biotin-TPL associated proteins pulled down from *Col4a3<sup>-/-</sup>* fibrotic kidneys. This table has seven tabs, containing summary and six tabs corresponding to each band cut from silver staining of proteins in polyacrylamide gels. The number of unique and shared peptides and quarry numbers are shown.

**Supplemental Table 1. Clinical information of human biospecimens used in this study.**

| Human Serum of Healthy Donors                       |                    |            |        |               |            |             |            |                        |               |                          |                   |                             |                                                                             |                                                                  |                     |  |  |  |  |  |  |  |  |  |  |  |  |  |  |  |
|-----------------------------------------------------|--------------------|------------|--------|---------------|------------|-------------|------------|------------------------|---------------|--------------------------|-------------------|-----------------------------|-----------------------------------------------------------------------------|------------------------------------------------------------------|---------------------|--|--|--|--|--|--|--|--|--|--|--|--|--|--|--|
| KITID                                               | DCMDATE            | PATIENTID  | GENDER | AGE           | BMI        | SURVEYID    | TOBACCO    | ETHNICITY              | BSL_ID        | MAT_TYPE                 | VOLUME            |                             |                                                                             |                                                                  |                     |  |  |  |  |  |  |  |  |  |  |  |  |  |  |  |
| ONOIO                                               | 36731              | G100013713 | FEMALE | 19            | 22.676     | CONTROL_4_1 | NO         | HISPANIC/LATINO        | GF083097 0002 | B1                       | 1000              |                             |                                                                             |                                                                  |                     |  |  |  |  |  |  |  |  |  |  |  |  |  |  |  |
| FGB2H                                               | 36656              | G100001925 | MALE   | 21            | 18.365     | CONTROL_4_1 | NO         | WHITE/CAUCSIAN(POLISH) | GF051739 0007 | B1                       | 1000              |                             |                                                                             |                                                                  |                     |  |  |  |  |  |  |  |  |  |  |  |  |  |  |  |
| X9YLT                                               | 36724              | G100014071 | FEMALE | 22            | 23.373     | CONTROL_4_1 | NO         | WHITE/CAUCSIAN         | GF112455 0002 | B1                       | 1000              |                             |                                                                             |                                                                  |                     |  |  |  |  |  |  |  |  |  |  |  |  |  |  |  |
| UV494                                               | 36703              | G100014110 | MALE   | 22            | 23.590     | CONTROL_4_1 | NO         | WHITE/CAUCSIAN         | GF104399 0002 | B1                       | 1000              |                             |                                                                             |                                                                  |                     |  |  |  |  |  |  |  |  |  |  |  |  |  |  |  |
| ODT4Y                                               | 36752              | G100013137 | FEMALE | 32            | 20.889     | CONTROL_4_1 | NO         | ASIAN                  | GF082148 0003 | B1                       | 1000              |                             |                                                                             |                                                                  |                     |  |  |  |  |  |  |  |  |  |  |  |  |  |  |  |
| VOBL3                                               | 36991              | G100063629 | MALE   | 32            | 22.097     | CONTROL_4_1 | NO         | WHITE/CAUCSIAN         | GF107154 0003 | B1                       | 1000              |                             |                                                                             |                                                                  |                     |  |  |  |  |  |  |  |  |  |  |  |  |  |  |  |
| 6FQU8                                               | 36623              | G100001621 | FEMALE | 40            | 23.309     | CONTROL_4_1 | NO         | WHITE/CAUCSIAN(POLISH) | GF018569 0002 | B1                       | 1000              |                             |                                                                             |                                                                  |                     |  |  |  |  |  |  |  |  |  |  |  |  |  |  |  |
| AYCBV                                               | 36804              | G100014684 | MALE   | 42            | 24.251     | CONTROL_4_1 | NO         | BLACK/AFRICAN-AMERICAN | GF033970 0002 | B1                       | 1000              |                             |                                                                             |                                                                  |                     |  |  |  |  |  |  |  |  |  |  |  |  |  |  |  |
| LDPGP                                               | 36696              | G100002465 | MALE   | 50            | 22.598     | CONTROL_4_1 | NO         | WHITE/CAUCSIAN(POLISH) | GF071885 0006 | B1                       | 1000              |                             |                                                                             |                                                                  |                     |  |  |  |  |  |  |  |  |  |  |  |  |  |  |  |
| YDZGT                                               | 36740              | G100013372 | FEMALE | 50            | 24.977     | CONTROL_4_1 | NO         | ASIAN                  | GF116345 0003 | B1                       | 1000              |                             |                                                                             |                                                                  |                     |  |  |  |  |  |  |  |  |  |  |  |  |  |  |  |
| Human Serum of Diabetic type I and type II Patients |                    |            |        |               |            |             |            |                        |               |                          |                   |                             |                                                                             |                                                                  |                     |  |  |  |  |  |  |  |  |  |  |  |  |  |  |  |
| Sample ID                                           | Date of collection | Sex        | Age    | Specimen type | Volume, mL | Ethnicity   | Height, cm | Weight, kg             | BMI           | Diagnosis                | Date of diagnosis | Blood Glucose level, mmol/L | Symptoms                                                                    | Current medications                                              | Smoking history     |  |  |  |  |  |  |  |  |  |  |  |  |  |  |  |
| 71356S                                              | 10/21/2013         | M          | 71     | serum         | 1x1mL      | Caucasian   | 170        | 80                     | 27.7          | Diabetes Mellitus type 2 | 2011              | 7.5                         | dry skin, thirst, increased appetite                                        | actoprid, Protaphane, Captopril, Egilok, Furosemide              | no                  |  |  |  |  |  |  |  |  |  |  |  |  |  |  |  |
| 71357S                                              | 10/21/2013         | F          | 80     | serum         | 1x1mL      | Caucasian   | 167        | 70                     | 25.1          | Diabetes Mellitus type 2 | 2005              | 7.6                         | excessive thirst, frequent urination, genital itching                       | actoprid, Captopril, Egilok, Verospiron                          | no                  |  |  |  |  |  |  |  |  |  |  |  |  |  |  |  |
| 71358S                                              | 10/21/2013         | F          | 72     | serum         | 1x1mL      | Caucasian   | 169        | 67                     | 23.5          | Diabetes Mellitus type 2 | 2012              | 7.8                         | itchy skin, thirst, dizziness                                               | actoprid, Enalapril, Perindopril, Furosemide, Bisoprolol         | no                  |  |  |  |  |  |  |  |  |  |  |  |  |  |  |  |
| 71350S                                              | 10/16/2013         | F          | 81     | serum         | 1x1mL      | Caucasian   | 167        | 80                     | 28.7          | Diabetes Mellitus type 2 | 2001              | 7.5                         | excessive thirst, skin itching, fatigue                                     | Diabetone, Metformin, Egilok, Captopril, Hypothiazide            | no                  |  |  |  |  |  |  |  |  |  |  |  |  |  |  |  |
| 71351S                                              | 10/21/2013         | F          | 75     | serum         | 1x1mL      | Caucasian   | 167        | 86                     | 30.8          | Diabetes Mellitus type 2 | 2004              | 7.6                         | excessive thirst, irritability, skin scratches                              | actoprid, Enalapril, Bisoprolol, Nifecard, Verospiron            | no                  |  |  |  |  |  |  |  |  |  |  |  |  |  |  |  |
| 71352S                                              | 10/21/2013         | F          | 80     | serum         | 1x1mL      | Caucasian   | 167        | 80                     | 28.7          | Diabetes Mellitus type 2 | 1998              | 7.6                         | excessive thirst, appetite, dry skin, headaches                             | insulin therapy, Captopril, Egilok, Hypothiazide                 | no                  |  |  |  |  |  |  |  |  |  |  |  |  |  |  |  |
| 71354S                                              | 10/21/2013         | F          | 73     | serum         | 1x1mL      | Caucasian   | 170        | 86                     | 29.8          | Diabetes Mellitus type 2 | 2003              | 7.7                         | dry skin, excessive thirst, fatigue                                         | immunotherapy, Cordaflex, Egilok, Furosemide                     | no                  |  |  |  |  |  |  |  |  |  |  |  |  |  |  |  |
| 71348S                                              | 10/16/2013         | F          | 75     | serum         | 1x1mL      | Caucasian   | 170        | 86                     | 29.8          | Diabetes Mellitus type 2 | 2010              | 7.6                         | excessive thirst, dry skin, headache, fatigue                               | Diabetone, Metformin, Enalapril, Betaloc, Verospiron             | no                  |  |  |  |  |  |  |  |  |  |  |  |  |  |  |  |
| 71334S                                              | 8/20/2013          | F          | 76     | serum         | 1x1mL      | Caucasian   | 170        | 89                     | 30.8          | Diabetes Mellitus type 2 | 2012              | 7.6                         | excessive thirst, dyspnea at rest, headaches, fatigue                       | anaprilin, Maninil, Metformin, Losartan, Perindopril, Verospiron | no                  |  |  |  |  |  |  |  |  |  |  |  |  |  |  |  |
| 71338S                                              | 8/26/2013          | M          | 72     | serum         | 1x1mL      | Caucasian   | 175        | 80                     | 26.1          | Diabetes Mellitus type 2 | 2012              | 7.6                         | headache, fatigue, itchy skin, excessive thirst                             | Diabetone, Metformin, Egilok, Losartan, Verospiron               | no                  |  |  |  |  |  |  |  |  |  |  |  |  |  |  |  |
| 71490S                                              | 9/10/2014          | M          | 36     | serum         | 1x1ml      | Caucasian   | 180        | 80                     | 24.7          | Diabetes Mellitus type I | 2007              | 8.6                         | excessive thirst, fatigue                                                   | insulin therapy, No-Spa, papaverine, platyphylline, arifon       | 12 years 1 pack/day |  |  |  |  |  |  |  |  |  |  |  |  |  |  |  |
| 71492S                                              | 9/10/2014          | F          | 40     | serum         | 1x1ml      | Caucasian   | 167        | 75                     | 26.9          | Diabetes Mellitus type I | 2008              | 8.2                         | frequent urination                                                          | insulin therapy, pancreatin, Lozapine, arifon, No-Spa            | no                  |  |  |  |  |  |  |  |  |  |  |  |  |  |  |  |
| 71488S                                              | 9/10/2014          | M          | 40     | serum         | 1x1ml      | Caucasian   | 168        | 80                     | 28.3          | Diabetes Mellitus type I | 2008              | 8.6                         | headache, excessive thirst, increased appetite                              | actrapid, papaverine, platyphylline, enalapril, arifon           | no                  |  |  |  |  |  |  |  |  |  |  |  |  |  |  |  |
| 71479S                                              | 9/8/2014           | F          | 40     | serum         | 1x1ml      | Caucasian   | 167        | 70                     | 25.1          | Diabetes Mellitus type I | 2007              | 8.6                         | excessive thirst, frequent urination, fatigue, tiredness                    | insulin therapy, papaverine, platyphylline, mesim forte          | no                  |  |  |  |  |  |  |  |  |  |  |  |  |  |  |  |
| 71457S                                              | 6/3/2014           | M          | 47     | serum         | 1x1ml      | Caucasian   | 167        | 75                     | 26.9          | Diabetes Mellitus type I | 1998              | 8.5                         | headache, excessive thirst, increased appetite, itching, sleep disturbance  | actrapid, Lozapine, enalapril, arifon                            | no                  |  |  |  |  |  |  |  |  |  |  |  |  |  |  |  |
| 71458S                                              | 6/3/2014           | M          | 45     | serum         | 1x1ml      | Caucasian   | 165        | 80                     | 29.4          | Diabetes Mellitus type I | 1998              | 8.3                         | excessive thirst, increased appetite, frequent urination, headache, fatigue | insulin therapy, losartan, enalapril, arifon                     | no                  |  |  |  |  |  |  |  |  |  |  |  |  |  |  |  |
| 71452S                                              | 5/27/2014          | M          | 41     | serum         | 1x1ml      | Caucasian   | 170        | 75                     | 26            | Diabetes Mellitus type I | 1996              | 8.2                         | excessive thirst, increased appetite, itching, sleep disturbance            | insulin therapy, Prestarium, Lozapine, arifon                    | no                  |  |  |  |  |  |  |  |  |  |  |  |  |  |  |  |

|                                                          |           |          |        |       |                   |           |        |                                                      |               |                          |         |         |                                                                                                                                                                                                                                                                                        |                                                                                                                           |                     |  |  |  |
|----------------------------------------------------------|-----------|----------|--------|-------|-------------------|-----------|--------|------------------------------------------------------|---------------|--------------------------|---------|---------|----------------------------------------------------------------------------------------------------------------------------------------------------------------------------------------------------------------------------------------------------------------------------------------|---------------------------------------------------------------------------------------------------------------------------|---------------------|--|--|--|
| 71448S                                                   | 5/27/2014 | M        | 50     | serum | 1x1ml             | Caucasian | 170    | 75                                                   | 26            | Diabetes Mellitus type I | 1998    | 8.2     | excessive thirst, increased appetite, itching, headache, tachycardia                                                                                                                                                                                                                   | insulin therapy, Digoxin, ephylline, verosipron, enalapril                                                                | 20 years 1 pack/day |  |  |  |
| 71446S                                                   | 5/27/2014 | F        | 44     | serum | 1x1ml             | Caucasian | 166    | 66                                                   | 24            | Diabetes Mellitus type I | 2008    | 8.5     | tachycardia, excessive thirst, increased appetite, frequent urination, fatigue                                                                                                                                                                                                         | insulin therapy, monopril, egiloc, furosemide                                                                             | no                  |  |  |  |
| 71447S                                                   | 5/27/2014 | F        | 48     | serum | 1x1ml             | Caucasian | 167    | 70                                                   | 25.1          | Diabetes Mellitus type I | 2009    | 8.2     | excessive thirst, itching, blurry vision                                                                                                                                                                                                                                               | actrapid, Physiotens, egiloc, arifon                                                                                      | no                  |  |  |  |
| <b>Human Serum of Diabetic Patients with Nephropathy</b> |           |          |        |       |                   |           |        |                                                      |               |                          |         |         |                                                                                                                                                                                                                                                                                        |                                                                                                                           |                     |  |  |  |
| study                                                    | sample_id | Mat_type | Volume | age   | DIABETES_DIAG_age | Gender    | BMI    | ETHNIC_you                                           | DIABETES_TYPE | BG_LEVEL                 | BG_UNIT | BG_TYPE | DIAB_CONDITION                                                                                                                                                                                                                                                                         | Pres_Medications                                                                                                          |                     |  |  |  |
| DIABETES_4_1                                             | YKNY6     | Serum    | 2000   | 29    | 2                 | FEMALE    | 36.328 | WHITE/CAUCASIAN ** AMERICAN INDIAN OR ALASKAN NATIVE | TYPE I        | 1300                     | mg/dL   | RANDOM  | EYE PROBLEMS ( YES ) ** DIABETIC NEUROPATHY ( YES ) ** DIABETIC NEPHROPATHY ( YES ) ** PERIPHERAL VASCULAR DISEASE ( NO ) ** ULCER OR INFECTION OF THE FOOT OR LEG ( NO ) ** LOWER EXTREMITY AMPUTATION ( NO ) ** VEIN GRAFT ( NO ) ** IMPOTENCE ( NO ) ** HEART ATTACK ( NO )         | INSULIN(1973) ** LOTENSIN(2000)                                                                                           |                     |  |  |  |
| DIABETES_4_1                                             | T6i5U     | Serum    | 2000   | 32    | 11                | FEMALE    | 36.934 | WHITE/CAUCASIAN ** AMERICAN INDIAN OR ALASKAN NATIVE | TYPE I        | 700                      | mg/dL   | FASTING | EYE PROBLEMS ( YES ) ** DIABETIC NEUROPATHY ( YES ) ** DIABETIC NEPHROPATHY ( YES ) ** PERIPHERAL VASCULAR DISEASE ( NO ) ** ULCER OR INFECTION OF THE FOOT OR LEG ( NO ) ** LOWER EXTREMITY AMPUTATION ( NO ) ** VEIN GRAFT ( NO ) ** IMPOTENCE ( NO ) ** HEART ATTACK ( NO )         | RHINOCORT(1999) ** CLARITIN(1998) ** PROZAC(1995) ** ALESSE(1999) ** INSULIN N(1978) ** INSULIN R(1978) ** MONOPRIL(1998) |                     |  |  |  |
| DIABETES_4_1                                             | 21Q1F     | Serum    | 1900   | 32    | 10                | MALE      | 22.145 | WHITE/CAUCASIAN                                      | TYPE I        | 1200                     | mg/dL   | FASTING | EYE PROBLEMS ( YES ) ** DIABETIC NEUROPATHY ( YES ) ** DIABETIC NEPHROPATHY ( YES ) ** PERIPHERAL VASCULAR DISEASE ( YES ) ** ULCER OR INFECTION OF THE FOOT OR LEG ( NO ) ** LOWER EXTREMITY AMPUTATION ( NO ) ** VEIN GRAFT ( NO ) ** IMPOTENCE ( NO ) ** HEART ATTACK ( NO )        | INSULIN(1978) ** PEPCID(1980)                                                                                             |                     |  |  |  |
| DIABETES_4_1                                             | QOQ3B     | Serum    | 1000   | 40    | 9                 | MALE      | 26.026 | WHITE/CAUCASIAN                                      | TYPE I        | 600                      | mg/dL   | FASTING | EYE PROBLEMS ( YES ) ** DIABETIC NEUROPATHY ( YES ) ** DIABETIC NEPHROPATHY ( YES ) ** PERIPHERAL VASCULAR DISEASE ( YES ) ** ULCER OR INFECTION OF THE FOOT OR LEG ( NO ) ** LOWER EXTREMITY AMPUTATION ( NO ) ** VEIN GRAFT ( NO ) ** IMPOTENCE ( NO ) ** HEART ATTACK ( NO )        | INSULIN(1969) ** PRESTARUM(1998) ** CARDURA(1998) ** AMLOZEK(1999) ** POLFILIN(1999)                                      |                     |  |  |  |
| DIABETES_4_1                                             | H9HPR     | Serum    | 2000   | 43    | 36                | FEMALE    | 22.032 | WHITE/CAUCASIAN                                      | TYPE II       | 570                      | mg/dL   | FASTING | EYE PROBLEMS ( YES ) ** DIABETIC NEUROPATHY ( YES ) ** DIABETIC NEPHROPATHY ( YES ) ** PERIPHERAL VASCULAR DISEASE ( NO ) ** ULCER OR INFECTION OF THE FOOT OR LEG ( NO ) ** LOWER EXTREMITY AMPUTATION ( NO ) ** VEIN GRAFT ( NO ) ** IMPOTENCE ( DON'T KNOW ) ** HEART ATTACK ( NO ) | HUMULIN M3(1997)                                                                                                          |                     |  |  |  |

|              |       |       |      |    |    |        |        |                                   |         |     |       |         |                                                                                                                                                                                                                                                                                                 |                                                                                                                                                                                                              |
|--------------|-------|-------|------|----|----|--------|--------|-----------------------------------|---------|-----|-------|---------|-------------------------------------------------------------------------------------------------------------------------------------------------------------------------------------------------------------------------------------------------------------------------------------------------|--------------------------------------------------------------------------------------------------------------------------------------------------------------------------------------------------------------|
| DIABETES_4_1 | 28CSD | Serum | 2000 | 46 | 46 | FEMALE | 50.712 | AMERICAN INDIAN OR ALASKAN NATIVE | TYPE II | 700 | mg/dL | RANDOM  | EYE PROBLEMS ( YES ) ** DIABETIC NEUROPATHY ( YES ) ** DIABETIC NEPHROPATHY ( YES ) ** PERIPHERAL VASCULAR DISEASE ( YES ) ** ULCER OR INFECTION OF THE FOOT OR LEG ( NO ) ** LOWER EXTREMITY AMPUTATION ( NO ) ** VEIN GRAFT ( NO ) ** IMPOTENCE ( DON'T KNOW ) ** HEART ATTACK ( DON'T KNOW ) | SYNTHROID(1976) ** ELAVIL(1994) ** PRILOSEC(2000) ** NITROSTAT(1996) ** COMPAZINE(1998) ** ALBUTEROL(1980) ** ALTACE(2000) ** PAXIL(1998) ** HUMALIN(2000) ** HUMALOG(2000) ** DYAZIDE(1999) ** ULTRAM(2000) |
| DIABETES_4_1 | EVWUK | Serum | 2000 | 47 | 30 | MALE   | 21.296 | WHITE/CAUCASIAN                   | TYPE I  | 600 | mg/dL | RANDOM  | EYE PROBLEMS ( YES ) ** DIABETIC NEUROPATHY ( YES ) ** DIABETIC NEPHROPATHY ( YES ) ** PERIPHERAL VASCULAR DISEASE ( YES ) ** ULCER OR INFECTION OF THE FOOT OR LEG ( YES ) ** LOWER EXTREMITY AMPUTATION ( YES ) ** VEIN GRAFT ( NO ) ** IMPOTENCE ( NO ) ** HEART ATTACK ( NO )               | HUMALOG INSULIN(1984) ** ACIPHEX(1998) ** NORVASC(1998) ** FLOMAX(1998) ** LASIX(1998) ** PLAVIX(1998) ** ZAROXOLYN(1998)                                                                                    |
| DIABETES_4_1 | KOPLF | Serum | 1750 | 50 | 30 | FEMALE | 28.197 | WHITE/CAUCASIAN                   | TYPE I  | 800 | mg/dL | RANDOM  | EYE PROBLEMS ( YES ) ** DIABETIC NEUROPATHY ( NO ) ** DIABETIC NEPHROPATHY ( YES ) ** PERIPHERAL VASCULAR DISEASE ( NO ) ** ULCER OR INFECTION OF THE FOOT OR LEG ( NO ) ** LOWER EXTREMITY AMPUTATION ( NO ) ** VEIN GRAFT ( NO ) ** IMPOTENCE ( NO ) ** HEART ATTACK ( NO )                   | LISINAPRIL(1992) ** LEVOTHROID(1998) ** PREMARIN(1999) ** MEDROXYPROGESTERONE (1999) ** LOVASTATIN(2000)                                                                                                     |
| DIABETES_4_1 | IN7GU | Serum | 2000 | 52 | 45 | MALE   | 41.667 | WHITE/CAUCASIAN                   | TYPE II | 587 | mg/dL | RANDOM  | EYE PROBLEMS ( YES ) ** DIABETIC NEUROPATHY ( YES ) ** DIABETIC NEPHROPATHY ( YES ) ** PERIPHERAL VASCULAR DISEASE ( NO ) ** ULCER OR INFECTION OF THE FOOT OR LEG ( NO ) ** LOWER EXTREMITY AMPUTATION ( NO ) ** VEIN GRAFT ( NO ) ** IMPOTENCE ( NO ) ** HEART ATTACK ( YES )                 | LOPRESSOR(1994) ** LIPITOR(1996) ** GLUCOPHAGE(1993) ** GLYNASE(1993) ** MONOPRIL(2000) ** ACTOS(2000)                                                                                                       |
| DIABETES_4_1 | GRYKD | Serum | 2000 | 53 | 41 | FEMALE | 29.997 | WHITE/CAUCASIAN                   | TYPE II | 566 | mg/dL | 0       | EYE PROBLEMS ( YES ) ** DIABETIC NEUROPATHY ( YES ) ** DIABETIC NEPHROPATHY ( YES ) ** PERIPHERAL VASCULAR DISEASE ( YES ) ** ULCER OR INFECTION OF THE FOOT OR LEG ( YES ) ** LOWER EXTREMITY AMPUTATION ( NO ) ** VEIN GRAFT ( NO ) ** IMPOTENCE ( DON'T KNOW ) ** HEART ATTACK ( NO )        | HUMALOG(2001) ** GLUCOBAY(2001)                                                                                                                                                                              |
| DIABETES_4_1 | 8LK6I | Serum | 2000 | 63 | 62 | MALE   | 21.778 | BLACK/AFRICAN-AMERICAN            | TYPE II | 800 | mg/dL | RANDOM  | EYE PROBLEMS ( YES ) ** DIABETIC NEUROPATHY ( NO ) ** DIABETIC NEPHROPATHY ( YES ) ** PERIPHERAL VASCULAR DISEASE ( NO ) ** ULCER OR INFECTION OF THE FOOT OR LEG ( NO ) ** LOWER EXTREMITY AMPUTATION ( NO ) ** VEIN GRAFT ( NO ) ** IMPOTENCE ( NO ) ** HEART ATTACK ( NO )                   | 0                                                                                                                                                                                                            |
| DIABETES_4_1 | 873U3 | Serum | 1000 | 69 | 58 | MALE   | 31.02  | BLACK/AFRICAN-AMERICAN            | TYPE II | 702 | mg/dL | FASTING | EYE PROBLEMS ( NO ) ** DIABETIC NEUROPATHY ( YES ) ** DIABETIC NEPHROPATHY ( YES ) ** PERIPHERAL VASCULAR DISEASE ( YES ) ** ULCER OR INFECTION OF THE FOOT OR LEG ( NO ) ** LOWER EXTREMITY AMPUTATION ( NO ) ** VEIN GRAFT ( NO ) ** IMPOTENCE ( YES ) ** HEART ATTACK ( NO )                 | TOPROL(1999) ** PROCARDIA(1998) ** ISOSORBIDE(1998) ** LASIX(1998) ** ACTOS(1999) ** ZOCOR(1998) ** HYDRALAZINE(1999) ** K-DUR(1999) ** PLETAL(1999)                                                         |

| Fresh Frozen Human Kidney Tissues with or without Renal Disease |                    |     |              |               |         |                 |            |                   |                    |                                                                 |                                                                      |                 |                 |            |      |
|-----------------------------------------------------------------|--------------------|-----|--------------|---------------|---------|-----------------|------------|-------------------|--------------------|-----------------------------------------------------------------|----------------------------------------------------------------------|-----------------|-----------------|------------|------|
| Sample ID                                                       | Sex                | Age | Ethnic backg | Sample type   | Matrix  | Date of autopsy | PMI, hours | BMI               | Diabetes yes / no  | Cause of death                                                  | Renal disease                                                        | Weight, gm      |                 |            |      |
| 052025A(4)                                                      | M                  | 90  | Caucasian    | FF            | kidney  | 06/19/2017      | 3          | 24.8              | yes                | coronary sclerosis, circulatory insufficiency                   | diabetic nephropathy                                                 | 0.8             |                 |            |      |
| 051980A(4)                                                      | F                  | 61  | Caucasian    | FF            | kidney  | 03/10/2017      | 2.5        | 41.5              | yes                | COPD, pneumonia, cardiovascular failure                         | diabetic nephropathy                                                 | 0.8             |                 |            |      |
| 051979A(1)                                                      | F                  | 68  | Caucasian    | FF            | kidney  | 03/03/2017      | 3          | 51.9              | yes                | heart failure                                                   | diabetic nephropathy                                                 | 0.8             |                 |            |      |
| 051937A(3)                                                      | F                  | 69  | Caucasian    | FF            | kidney  | 09/01/2016      | 2.5        | 25.7              | yes                | ischemic stroke, pulmonary embolism                             | diabetic nephropathy                                                 | 0.9             |                 |            |      |
| 051917A(4)                                                      | M                  | 84  | Caucasian    | FF            | kidney  | 06/09/2016      | 4.5        | 24.5              | yes                | discirculatory encephalopathy, pneumonia                        | diabetic nephropathy                                                 | 0.7             |                 |            |      |
| 051904A(3)                                                      | M                  | 64  | Caucasian    | FF            | kidney  | 04/29/2016      | 4          | 32.7              | yes                | ischemic stroke, cerebral edema                                 | diabetic nephropathy                                                 | 0.8             |                 |            |      |
| 051727A(5)                                                      | F                  | 58  | Caucasian    | FF            | kidney  | 06/04/2015      | 5          | 32.9              | yes                | ischemic stroke                                                 | diabetic nephropathy                                                 | 0.9             |                 |            |      |
| 051707A(7)                                                      | M                  | 57  | Caucasian    | FF            | kidney  | 05/21/2015      | 6          | 27.5              | yes                | MI, asystole, renal failure                                     | diabetic nephropathy                                                 | 0.9             |                 |            |      |
| 05771A(1)                                                       | F                  | 72  | Caucasian    | FF            | kidney  | 08/13/2011      | 5          | N/A               | yes                | recurrent stroke, cerebral edema, brain stem dislocation        | diabetic nephropathy                                                 | 0.8             |                 |            |      |
| 051982A(7)                                                      | F                  | 44  | Caucasian    | FF            | kidney  | 03/17/2017      | 2.5        | 26.0              | no                 | peptic ulcer perforation, peritonitis                           | no                                                                   | 0.9             |                 |            |      |
| 051918A(3)                                                      | M                  | 67  | Caucasian    | FF            | kidney  | 06/22/2016      | 4.5        | 26.1              | no                 | hemorrhagic stroke, PE                                          | no                                                                   | 0.7             |                 |            |      |
| 051912A(3)                                                      | M                  | 32  | Caucasian    | FF            | kidney  | 05/12/2016      | 3          | 29.6              | no                 | subarachnoid hemorrhage, cerebral edema, brain stem dislocation | no                                                                   | 0.8             |                 |            |      |
| 051696A(5)                                                      | F                  | 60  | Caucasian    | FF            | kidney  | 04/13/2015      | 4.5        | 31.9              | no                 | PE                                                              | no                                                                   | 0.5             |                 |            |      |
| 051659A(8)                                                      | M                  | 54  | Caucasian    | FF            | kidney  | 12/09/2014      | 1.5        | 31.0              | no                 | acute coronary syndrome                                         | no                                                                   | 0.9             |                 |            |      |
| 051617A(12)                                                     | M                  | 34  | Caucasian    | FF            | kidney  | 09/01/2014      | 2.5        | 22.8              | no                 | poisoning by unspecified substance                              | no                                                                   | 0.6             |                 |            |      |
| 051553A(13)                                                     | M                  | 58  | Caucasian    | FF            | kidney  | 06/19/2014      | 1.5        | 28.9              | no                 | acute ethanol poisoning                                         | no                                                                   | 0.8             |                 |            |      |
| 051102A(1)                                                      | M                  | 65  | Caucasian    | FF            | kidney  | 02/19/2013      | 5.5        | N/A               | no                 | ischemic stroke, cerebral edema                                 | no                                                                   | 0.45            |                 |            |      |
| 051079A(3)                                                      | M                  | 59  | Caucasian    | FF            | kidney  | 01/24/2013      | 3          | N/A               | no                 | abscess of the anterior abdominal wall, intoxication            | no                                                                   | 0.9             |                 |            |      |
| Urine Samples of Healthy Donors                                 |                    |     |              |               |         |                 |            |                   |                    |                                                                 |                                                                      |                 |                 |            |      |
| Donor ID                                                        | Date collected     | Sex | Age          | Specimen type | Volume  | Ethnicity       | Height, cm | Weight, kg        | BMI                | Patient diagnosis                                               | eGFR, mL/min/1.73m2                                                  | Smoking history | Medical history |            |      |
| D5715Ur                                                         | 41613              | F   | 56           | urine         | 1 x 5mL | Caucasian       | 170        | 60                | 20.8               | normal donor                                                    | 136                                                                  | no              | no              |            |      |
| D5714Ur                                                         | 41613              | F   | 54           | urine         | 1 x 5mL | Caucasian       | 161        | 55                | 21.2               | normal donor                                                    | 157                                                                  | no              | no              |            |      |
| D5712Ur                                                         | 41613              | M   | 53           | urine         | 1 x 5mL | Caucasian       | 176        | 75                | 24.2               | normal donor                                                    | 124                                                                  | no              | no              |            |      |
| D5711Ur                                                         | 41613              | M   | 55           | urine         | 1 x 5mL | Caucasian       | 180        | 90                | 27.8               | normal donor                                                    | 117                                                                  | no              | no              |            |      |
| D5745Ur                                                         | 41617              | F   | 57           | urine         | 1 x 5mL | Caucasian       | 165        | 62                | 22.8               | normal donor                                                    | 142                                                                  | no              | no              |            |      |
| D5744Ur                                                         | 41617              | F   | 60           | urine         | 1 x 5mL | Caucasian       | 161        | 70                | 27                 | normal donor                                                    | 139                                                                  | no              | no              |            |      |
| D5743Ur                                                         | 41617              | F   | 51           | urine         | 1 x 5mL | Caucasian       | 152        | 50                | 21.6               | normal donor                                                    | 116                                                                  | no              | no              |            |      |
| D5741Ur                                                         | 41617              | M   | 50           | urine         | 1 x 5mL | Caucasian       | 180        | 90                | 27.8               | normal donor                                                    | 128                                                                  | no              | no              |            |      |
| D5967Ur                                                         | 41668              | F   | 55           | urine         | 1 x 5mL | Caucasian       | 161        | 72                | 27.8               | normal donor                                                    | 133                                                                  | no              | no              |            |      |
| D5964Ur                                                         | 41668              | F   | 47           | urine         | 1 x 5mL | Caucasian       | 165        | 66                | 24.2               | normal donor                                                    | 141                                                                  | no              | no              |            |      |
| Urine Samples of DKD Patients                                   |                    |     |              |               |         |                 |            |                   |                    |                                                                 |                                                                      |                 |                 |            |      |
| Sample ID                                                       | Date of collection | Sex | Age          | Specimen type | Volume  | Ethnicity       | Diagnosis  | Date of diagnosis | Creatinine, µmol/L | eGFR, mL/min/1.73m2                                             | Medical history                                                      | Smoking history | Height, cm      | Weight, kg | BMI  |
| 60035Ur                                                         | 41606              | F   | 82           | urine         | 1 x 5mL | Caucasian       | DKD        | 2010              | 190                | 31                                                              | Diabetes mellitus type II, Diabetic Nephropathy, Diabetic Neuropathy | no              | 163             | 71         | 26.7 |
| 60036Ur                                                         | 41607              | F   | 64           | urine         | 1 x 5mL | Caucasian       | DKD        | 2012              | 210                | 29                                                              | Diabetes mellitus type II, Diabetic Nephropathy                      | no              | 169             | 79         | 27.7 |
| 60037Ur                                                         | 41607              | F   | 62           | urine         | 1 x 5mL | Caucasian       | DKD        | 2012              | 130                | 51                                                              | Diabetes mellitus type II, Diabetic Nephropathy                      | no              | 165             | 58         | 21.3 |
| 60038Ur                                                         | 41607              | M   | 65           | urine         | 1 x 5mL | Caucasian       | DKD        | 2011              | 190                | 44                                                              | Diabetes mellitus type II, Diabetic Nephropathy, Hypertension        | no              | 178             | 86         | 27.1 |



| 60040Ur                               | 41612   | M     | 61          | urine              | 1 x 5mL                      | Caucasian | DKD       | 2012   | 180       | 47               | Diabetes mellitus type II, Diabetic Nephropathy, Coronary Artery Disease      | no                                                                                                                                                                                                                              | 179                                                                                                                                                                       | 87 | 27.2 |  |
|---------------------------------------|---------|-------|-------------|--------------------|------------------------------|-----------|-----------|--------|-----------|------------------|-------------------------------------------------------------------------------|---------------------------------------------------------------------------------------------------------------------------------------------------------------------------------------------------------------------------------|---------------------------------------------------------------------------------------------------------------------------------------------------------------------------|----|------|--|
| 60068Ur                               | 41863   | F     | 59          | urine              | 1 x 5mL                      | Caucasian | DKD       | 2013   | 399       | 14               | Diabetes mellitus type II, Diabetic Nephropathy, Diabetic Neuropathy, obesity | 24 years 1 pack/day                                                                                                                                                                                                             | 162                                                                                                                                                                       | 98 | 37.3 |  |
| <b>Paired Serum and Urine Samples</b> |         |       |             |                    |                              |           |           |        |           |                  |                                                                               |                                                                                                                                                                                                                                 |                                                                                                                                                                           |    |      |  |
| Healthy donor                         |         |       |             |                    |                              |           |           |        |           |                  |                                                                               |                                                                                                                                                                                                                                 |                                                                                                                                                                           |    |      |  |
| UID                                   | Donor # | Type  | Volume (mL) | Hemolyzed (Yes/No) | Viral Status (HTV, HIV, HBV) | Age       | Age Units | Gender | Race      | Ethnicity        | Country of Collection                                                         | Diagnosis                                                                                                                                                                                                                       | Medications                                                                                                                                                               |    |      |  |
| 337419                                | 3       | Serum | 7           | Non-Hemolyzed      | Not Tested                   | 64        | Year(s)   | Female | N/A       | Hispanic         | United States of America (USA)                                                | Normal Donor                                                                                                                                                                                                                    | None                                                                                                                                                                      |    |      |  |
| 337420                                | 3       | Urine | 5.5         | Non-Hemolyzed      | Not Tested                   | 64        | Year(s)   | Female | N/A       | Hispanic         | United States of America (USA)                                                | Normal Donor                                                                                                                                                                                                                    | None                                                                                                                                                                      |    |      |  |
| 339284                                | 15      | Serum | 6.5         | Non-Hemolyzed      | Not Tested                   | 41        | Year(s)   | Male   | African   | African American | United States of America (USA)                                                | Normal Donor                                                                                                                                                                                                                    | None                                                                                                                                                                      |    |      |  |
| 339285                                | 15      | Urine | 36.5        | Non-Hemolyzed      | Not Tested                   | 41        | Year(s)   | Male   | African   | African American | United States of America (USA)                                                | Normal Donor                                                                                                                                                                                                                    | None                                                                                                                                                                      |    |      |  |
| 413624                                | 57      | Serum | 10.5        | Non-Hemolyzed      | Not Tested                   | 50        | Year(s)   | Male   | Caucasian | N/A              | United States of America (USA)                                                | Normal Donor                                                                                                                                                                                                                    | None                                                                                                                                                                      |    |      |  |
| 413575                                | 57      | Urine | 2           | Non-Hemolyzed      | Not Tested                   | 50        | Year(s)   | Male   | Caucasian | N/A              | United States of America (USA)                                                | Normal Donor                                                                                                                                                                                                                    | None                                                                                                                                                                      |    |      |  |
| Type 2 diabetics                      |         |       |             |                    |                              |           |           |        |           |                  |                                                                               |                                                                                                                                                                                                                                 |                                                                                                                                                                           |    |      |  |
| 411578                                | 32      | Serum | 13.5        | Non-Hemolyzed      | N/A                          | 40        | Year(s)   | Female | Caucasian | N/A              | United States of America (USA)                                                | Type 2 Diabetes, Polycystic Ovary Syndrome (PCOS)                                                                                                                                                                               | Metformin 500mg                                                                                                                                                           |    |      |  |
| 411545                                | 32      | Urine | 32.5        | Non-Hemolyzed      | N/A                          | 40        | Year(s)   | Female | Caucasian | N/A              | United States of America (USA)                                                | Type 2 Diabetes, Polycystic Ovary Syndrome (PCOS)                                                                                                                                                                               | Metformin 500mg                                                                                                                                                           |    |      |  |
| 411521                                | 119     | Serum | 6           | Non-Hemolyzed      | N/A                          | 55        | Year(s)   | Female | Other     | N/A              | United States of America (USA)                                                | Type 2 Diabetes                                                                                                                                                                                                                 | Lasix 40mg, Metformin 1000mg, Levothyroxine 0.075mg, Novolog 80units, Levemir 220mg, Omeprazole 40mg, Carvedilol 25mg                                                     |    |      |  |
| 411480                                | 119     | Urine | 24.5        | Non-Hemolyzed      | N/A                          | 55        | Year(s)   | Female | Other     | N/A              | United States of America (USA)                                                | Type 2 Diabetes                                                                                                                                                                                                                 | Lasix 40mg, Metformin 1000mg, Levothyroxine 0.075mg, Novolog 80units, Levemir 220mg, Omeprazole 40mg, Carvedilol 25mg                                                     |    |      |  |
| 380715                                | 72      | Serum | 11          | Non-Hemolyzed      | N/A                          | 51        | Year(s)   | Male   | N/A       | Hispanic         | United States of America (USA)                                                | Type 2 Diabetes, Hypertension (HTN)                                                                                                                                                                                             | Losartan 25mg, Aspirin 81mg, Lisinopril 5mg, Metformin 500mg                                                                                                              |    |      |  |
| 380716                                | 72      | Urine | 31.5        | Non-Hemolyzed      | N/A                          | 51        | Year(s)   | Male   | N/A       | Hispanic         | United States of America (USA)                                                | Glucose >110, Hypertension (HTN), Type 2 Diabetes                                                                                                                                                                               | Losartan 25mg, Aspirin 81mg, Lisinopril 5mg, Metformin 500mg                                                                                                              |    |      |  |
| 414123                                | 101     | Serum | 15.5        | Non-Hemolyzed      | N/A                          | 62        | Year(s)   | Male   | Caucasian | N/A              | United States of America (USA)                                                | Type 2 Diabetes, Gouty Arthritis                                                                                                                                                                                                | Allopurinol 300mg, Benazepril 20mg, Atorvastatin 40mg, Clopidogrel 75mg, Cyclobenzaprine 10mg                                                                             |    |      |  |
| 414100                                | 101     | Urine | 27.5        | Non-Hemolyzed      | N/A                          | 62        | Year(s)   | Male   | Caucasian | N/A              | United States of America (USA)                                                | Type 2 Diabetes, Gouty Arthritis                                                                                                                                                                                                | Allopurinol 300mg, Benazepril 20mg, Atorvastatin 40mg, Clopidogrel 75mg, Cyclobenzaprine 10mg                                                                             |    |      |  |
| DKD                                   |         |       |             |                    |                              |           |           |        |           |                  |                                                                               |                                                                                                                                                                                                                                 |                                                                                                                                                                           |    |      |  |
| 177774                                | 3       | Serum | 2           | Non-Hemolyzed      | Negative                     | 60        | Year(s)   | Male   | Caucasian | N/A              | United States of America (USA)                                                | Diabetic Nephropathy, Diabetic Neuropathy, Type 2 Diabetes, Dyslipidemia, Hypertension (HTN), Hypogonadism, Thyroid Goiter, Gastroesophageal Reflux Disease (GERD), Sleep Apnea, Erectile Dysfunction (ED), Chronic Lumbar Pain | Lantus 30units, Novolin 30units, Novolog 10units, Metformin 1000mg, Ultracet 37.5mg-325mg, Cymbalta 60mg, Jyrica 150mg, Loratadine 10mg, Lovastatin 40mg, Lisinopril 40mg |    |      |  |



**Supplemental Table 2: Summary of protein identification of Biotin-TPL pulldown from fibrotic mouse kidneys.**

| <b>Band</b> | <b>Description</b>                                            | <b>Protein ID</b> | <b>Gene ID</b> | <b>Aliases</b>                       |
|-------------|---------------------------------------------------------------|-------------------|----------------|--------------------------------------|
| 1           | E3 ubiquitin-protein ligase TRIM71                            | LIN-41            | TRIM71         | LIN-41, LIN41                        |
| 2           | TFIIH basal transcription factor complex helicase XPB subunit | ERCC3             | ERCC3          | BTF2, GTF2H, RAD25, TFIIH, TTD2, XPB |
| 3           | RNA-binding E3 ubiquitin-protein ligase MEX3C                 | MEX3C             | MEX3C          | BM-013, RNF194, RKHD2                |
| 4           | E3 ubiquitin-protein ligase TRIM63                            | TRI63             | TRIM63         | MuRF1, Rnf28, RF1                    |
| 5           | 26S proteasome non-ATPase regulatory subunit                  | PSD10             | PSMD10         |                                      |
| 6           | dCTP pyrophosphatase 1                                        | DCTP1             | DCTPP1         | CDA03, RS21C6, XTP3TPA               |

| Biotin-TPL pulldown Band #1 |                                                                                    |           |           |      |      |       |          |      |        |                                                                                                                                                                                                                                                                                                                                                                                                                                                                                           |  |
|-----------------------------|------------------------------------------------------------------------------------|-----------|-----------|------|------|-------|----------|------|--------|-------------------------------------------------------------------------------------------------------------------------------------------------------------------------------------------------------------------------------------------------------------------------------------------------------------------------------------------------------------------------------------------------------------------------------------------------------------------------------------------|--|
| 1.                          | LIN41_MOUSE Mass: 91996 Score: 16348 Matches: 345(345) Sequences: 5(5) emPAI: 0.46 |           |           |      |      |       |          |      |        |                                                                                                                                                                                                                                                                                                                                                                                                                                                                                           |  |
|                             | E3 ubiquitin-protein ligase TRIM71 OS=Mus musculus GN=Trim71 PE=1 SV=1             |           |           |      |      |       |          |      |        |                                                                                                                                                                                                                                                                                                                                                                                                                                                                                           |  |
| Query                       | Observed                                                                           | Mr(expt)  | Mr(calc)  | ppm  | Miss | Score | Expect   | Rank | Unique | Peptide                                                                                                                                                                                                                                                                                                                                                                                                                                                                                   |  |
| 1321                        | 416.9032                                                                           | 1247.6879 | 1247.6874 | 0.40 | 0    | (71)  | 7.3e-007 | 1    | U      | R.LPAPGGAGPAEALK.L 1314                                                                                                                                                                                                                                                                                                                                                                                                                                                                   |  |
| 1322                        | 624.8513                                                                           | 1247.6881 | 1247.6874 | 0.58 | 0    | 95    | 3.1e-009 | 1    | U      | R.LPAPGGAGPAEALK.L 1300 1301 1302 1303 1304 1305 1306 1307 1308 1309 1310 1312 1313 1315 1316 1317 1318 1319 1320                                                                                                                                                                                                                                                                                                                                                                         |  |
| 3144                        | 499.9510                                                                           | 1496.8311 | 1496.8311 | 0.05 | 0    | (90)  | 6.4e-009 | 1    | U      | R.ALTIQLLADAQQGR.Q 3051 3052 3053 3062 3063 3068 3069 3070 3081 3082 3083 3093 3094 3095 3096 3097 3098 3099 3115 3116 3117 3127 3128 3140 3141 3142 3143 3145 3153 3154 3165 3166 3170 3171 3172 3173 3174                                                                                                                                                                                                                                                                               |  |
| 3176                        | 749.4231                                                                           | 1496.8316 | 1496.8311 | 0.39 | 0    | 113   | 3.3e-011 | 1    | U      | R.ALTIQLLADAQQGR.Q 3044 3045 3046 3047 3048 3050 3052 3054 3055 3057 3058 3059 3060 3061 3064 3065 3066 3067 3071 3072 3073 3074 3075 3076 3077 3078 3079 3080 3084 3085 3086 3087 3088 3089 3090 3091 3092 3100 3101 3102 3103 3104 3105 3106 3107 3108 3109 3110 3111 3112 3113 3114 3118 3119 3120 3121 3122 3123 3124 3125 3129 3130 3131 3132 3133 3134 3135 3136 3137 3138 3139 3146 3147 3148 3149 3150 3151 3152 3155 3156 3157 3158 3160 3161 3162 3163 3164 3167 3168 3175 3177 |  |

|  |      |          |           |           |       |   |      |          |   |   |                                                                                                                                                                                                                                                                                                                                                                                                                                                                          |
|--|------|----------|-----------|-----------|-------|---|------|----------|---|---|--------------------------------------------------------------------------------------------------------------------------------------------------------------------------------------------------------------------------------------------------------------------------------------------------------------------------------------------------------------------------------------------------------------------------------------------------------------------------|
|  | 3870 | 528.6324 | 1582.8755 | 1582.8759 | -0.25 | 0 | (86) | 2e-008   | 1 | U | R.IQIFTFEGQFLK.F 3785 3789 3790 3793 3794 3795 3798 3810 3811 3812 3813 3814 3815 3816 3817 3818 3819 3830 3831 3832 3833 3834 3835 3836 3838 3839 3840 3865 3866 3867 3868 3869 3871 3887 3888 3889 3890 3891 3892 3893 3910 3912 3913 3917 3918 3925 3926 3928 3929 3931 3934 3935                                                                                                                                                                                     |
|  | 3916 | 792.4452 | 1582.8759 | 1582.8759 | 0.02  | 0 | 115  | 2.6e-011 | 1 | U | R.IQIFTFEGQFLK.F 3786 3787 3788 3791 3792 3796 3797 3800 3801 3802 3803 3804 3805 3806 3807 3808 3809 3821 3822 3823 3824 3825 3826 3827 3828 3829 3841 3842 3843 3844 3845 3846 3847 3848 3849 3850 3851 3852 3853 3854 3855 3856 3857 3858 3859 3860 3861 3862 3863 3864 3872 3873 3874 3875 3876 3877 3878 3879 3880 3881 3882 3883 3884 3885 3894 3895 3896 3897 3898 3899 3900 3901 3902 3903 3904 3905 3906 3907 3908 3909 3914 3915 3919 3920 3921 3927 3932 3933 |
|  | 4667 | 825.8285 | 1649.6425 | 1649.6418 | 0.43  | 0 | (59) | 2.3e-006 | 1 | U | R.CLDCQEHLCDNCVR.A 4664 4666                                                                                                                                                                                                                                                                                                                                                                                                                                             |
|  | 4668 | 550.8882 | 1649.6427 | 1649.6418 | 0.52  | 0 | (49) | 2e-005   | 1 | U | R.CLDCQEHLCDNCVR.A 4662 4663 4665                                                                                                                                                                                                                                                                                                                                                                                                                                        |
|  | 5022 | 849.8207 | 1697.6268 | 1697.6266 | 0.13  | 0 | 80   | 1.3e-008 | 1 | U | R.CLDCQEHLCDNCVR.A                                                                                                                                                                                                                                                                                                                                                                                                                                                       |
|  | 5269 | 574.3162 | 1719.9268 | 1719.9269 | -0.06 | 0 | (69) | 1.2e-006 | 1 | U | R.IMFTPPDQALYLALK.S 5245 5253 5257 5258 5265 5268 5270 5271 5284 5289 5290                                                                                                                                                                                                                                                                                                                                                                                               |

|    |                                                                                                                                                                           |          |           |           |       |      |       |          |      |        |                                                                                   |
|----|---------------------------------------------------------------------------------------------------------------------------------------------------------------------------|----------|-----------|-----------|-------|------|-------|----------|------|--------|-----------------------------------------------------------------------------------|
|    | 5286                                                                                                                                                                      | 860.9709 | 1719.9272 | 1719.9269 | 0.17  | 0    | (88)  | 1.3e-008 | 1    | U      | R.IMFTPPDQALYLALK.S 5250 525<br>1 5252 5255 5256 5277 5278 5279<br>5285 5287 5293 |
|    | 5422                                                                                                                                                                      | 868.9681 | 1735.9216 | 1735.9219 | -0.15 | 0    | 99    | 1.1e-009 | 1    | U      | R.IMFTPPDQALYLALK.S 5412 541<br>4 5415 5416 5421 5424 5425 5426<br>5428 5429 5430 |
|    | 5423                                                                                                                                                                      | 579.6478 | 1735.9217 | 1735.9219 | -0.11 | 0    | (61)  | 7.2e-006 | 1    | U      | R.IMFTPPDQALYLALK.S 5417 541<br>8 5419 5427                                       |
|    | 5484                                                                                                                                                                      | 873.8128 | 1745.6110 | 1745.6113 | -0.16 | 0    | (63)  | 4.6e-007 | 1    | U      | R.CLDCQEHLCDNCVR.A 5485 548<br>6                                                  |
| 2. | DDB1_MOUSE Mass: 126772 Score: 71 Matches: 2(2) Sequences: 2(2) emPAI: 0.07<br>DNA damage-binding protein 1 OS=Mus musculus GN=Ddb1 PE=1 SV=2                             |          |           |           |       |      |       |          |      |        |                                                                                   |
|    | Query                                                                                                                                                                     | Observed | Mr(expt)  | Mr(calc)  | ppm   | Miss | Score | Expect   | Rank | Unique | Peptide                                                                           |
|    | 1584                                                                                                                                                                      | 651.3133 | 1300.6120 | 1300.6122 | -0.11 | 0    | 63    | 4.7e-006 | 1    | U      | K.GAVYSMVEFNGK.L                                                                  |
|    | 4394                                                                                                                                                                      | 548.6348 | 1642.8827 | 1642.8831 | -0.26 | 0    | 30    | 0.0092   | 1    | U      | R.ALYYLQIHPQELR.Q                                                                 |
| 3. | CO6A6_MOUSE Mass: 246169 Score: 51 Matches: 2(2) Sequences: 1(1) emPAI: 0.02<br>Collagen alpha-6(VI) chain OS=Mus musculus GN=Col6a6 PE=1 SV=2                            |          |           |           |       |      |       |          |      |        |                                                                                   |
|    | Query                                                                                                                                                                     | Observed | Mr(expt)  | Mr(calc)  | ppm   | Miss | Score | Expect   | Rank | Unique | Peptide                                                                           |
|    | 74                                                                                                                                                                        | 378.7158 | 755.4171  | 755.4177  | -0.78 | 1    | 33    | 0.00053  | 1    | U      | K.QGKEAIK.A 75                                                                    |
| 4. | OLIG1_MOUSE Mass: 27124 Score: 50 Matches: 1(1) Sequences: 1(1) emPAI: 0.17<br>Oligodendrocyte transcription factor 1 OS=Mus musculus GN=Olig1 PE=1 SV=2                  |          |           |           |       |      |       |          |      |        |                                                                                   |
|    | Query                                                                                                                                                                     | Observed | Mr(expt)  | Mr(calc)  | ppm   | Miss | Score | Expect   | Rank | Unique | Peptide                                                                           |
|    | 262                                                                                                                                                                       | 435.7931 | 869.5716  | 869.5698  | 2.09  | 0    | 50    | 1.7e-005 | 1    | U      | K.IATLLLLAR.N                                                                     |
|    | OLIG2_MOUSE Mass: 32386 Score: 50 Matches: 1(1) Sequences: 1(1)<br>Oligodendrocyte transcription factor 2 OS=Mus musculus GN=Olig2 PE=1 SV=1                              |          |           |           |       |      |       |          |      |        |                                                                                   |
|    | OLIG3_MOUSE Mass: 29488 Score: 50 Matches: 1(1) Sequences: 1(1)<br>Oligodendrocyte transcription factor 3 OS=Mus musculus GN=Olig3 PE=2 SV=1                              |          |           |           |       |      |       |          |      |        |                                                                                   |
| 5. | HA23_MOUSE Mass: 29089 Score: 50 Matches: 2(2) Sequences: 1(1) emPAI: 0.16<br>H-2 class II histocompatibility antigen, E-U alpha chain OS=Mus musculus GN=H2-Ea PE=2 SV=2 |          |           |           |       |      |       |          |      |        |                                                                                   |
|    | Query                                                                                                                                                                     | Observed | Mr(expt)  | Mr(calc)  | ppm   | Miss | Score | Expect   | Rank | Unique | Peptide                                                                           |

|     |                                                                                                                                                                |          |           |           |       |      |       |          |      |        |                      |
|-----|----------------------------------------------------------------------------------------------------------------------------------------------------------------|----------|-----------|-----------|-------|------|-------|----------|------|--------|----------------------|
|     | 341                                                                                                                                                            | 464.3030 | 926.5913  | 926.5913  | 0.08  | 0    | 35    | 0.00071  | 1    | U      | M.ATIGALLLR.F 339    |
| 6.  | CCNF_MOUSE Mass: 86568 Score: 46 Matches: 2(2) Sequences: 1(1) emPAI: 0.05<br>Cyclin-F OS=Mus musculus GN=Ccnf PE=2 SV=2                                       |          |           |           |       |      |       |          |      |        |                      |
|     | Query                                                                                                                                                          | Observed | Mr(expt)  | Mr(calc)  | ppm   | Miss | Score | Expect   | Rank | Unique | Peptide              |
|     | 562                                                                                                                                                            | 499.8214 | 997.6282  | 997.6284  | -0.16 | 0    | 35    | 0.00068  | 1    | U      | R.LASAALLLAR.L 561   |
| 7.  | COG2_MOUSE Mass: 81988 Score: 45 Matches: 1(1) Sequences: 1(1) emPAI: 0.05<br>Conserved oligomeric Golgi complex subunit 2 OS=Mus musculus GN=Cog2 PE=1 SV=2   |          |           |           |       |      |       |          |      |        |                      |
|     | Query                                                                                                                                                          | Observed | Mr(expt)  | Mr(calc)  | ppm   | Miss | Score | Expect   | Rank | Unique | Peptide              |
|     | 340                                                                                                                                                            | 464.3029 | 926.5912  | 926.5913  | -0.12 | 0    | 45    | 6.5e-005 | 1    | U      | R.LTLQILAR.F         |
| 8.  | NPA1P_MOUSE Mass: 254452 Score: 44 Matches: 2(2) Sequences: 1(1) emPAI: 0.02<br>Nucleolar pre-ribosomal-associated protein 1 OS=Mus musculus GN=Urb1 PE=1 SV=2 |          |           |           |       |      |       |          |      |        |                      |
|     | Query                                                                                                                                                          | Observed | Mr(expt)  | Mr(calc)  | ppm   | Miss | Score | Expect   | Rank | Unique | Peptide              |
|     | 2284                                                                                                                                                           | 704.8988 | 1407.7830 | 1407.7908 | -5.50 | 2    | 34    | 0.0021   | 1    | U      | R.ATIILFKDMGR.F 2287 |
| 9.  | EDC4_MOUSE Mass: 152389 Score: 38 Matches: 1(1) Sequences: 1(1) emPAI: 0.03<br>Enhancer of mRNA-decapping protein 4 OS=Mus musculus GN=Edc4 PE=1 SV=2          |          |           |           |       |      |       |          |      |        |                      |
|     | Query                                                                                                                                                          | Observed | Mr(expt)  | Mr(calc)  | ppm   | Miss | Score | Expect   | Rank | Unique | Peptide              |
|     | 268                                                                                                                                                            | 436.7328 | 871.4511  | 871.4512  | -0.08 | 0    | 38    | 0.001    | 1    | U      | R.ALAEGQQR.G         |
| 10. | SMUF1_MOUSE Mass: 83303 Score: 36 Matches: 1(1) Sequences: 1(1) emPAI: 0.05<br>E3 ubiquitin-protein ligase SMURF1 OS=Mus musculus GN=Smurf1 PE=1 SV=2          |          |           |           |       |      |       |          |      |        |                      |
|     | Query                                                                                                                                                          | Observed | Mr(expt)  | Mr(calc)  | ppm   | Miss | Score | Expect   | Rank | Unique | Peptide              |
|     | 2247                                                                                                                                                           | 467.5773 | 1399.7100 | 1399.7096 | 0.29  | 0    | 36    | 0.0029   | 1    | U      | K.TDSITISVWNHK.K     |
| 11. | NBR1_MOUSE Mass: 109889 Score: 35 Matches: 1(1) Sequences: 1(1) emPAI: 0.04<br>Next to BRCA1 gene 1 protein OS=Mus musculus GN=Nbr1 PE=1 SV=1                  |          |           |           |       |      |       |          |      |        |                      |
|     | Query                                                                                                                                                          | Observed | Mr(expt)  | Mr(calc)  | ppm   | Miss | Score | Expect   | Rank | Unique | Peptide              |
|     | 666                                                                                                                                                            | 531.7950 | 1061.5755 | 1061.5791 | -3.34 | 1    | 35    | 0.0037   | 1    | U      | K.KDVLVPCLK.A        |
| 12. | DYSF_MOUSE Mass: 237759 Score: 34 Matches: 1(1) Sequences: 1(1) emPAI: 0.02<br>Dysferlin OS=Mus musculus GN=Dysf PE=1 SV=3                                     |          |           |           |       |      |       |          |      |        |                      |

|     | Query                                                                                                                                                                  | Observed | Mr(expt)  | Mr(calc)  | ppm   | Miss | Score | Expect  | Rank | Unique | Peptide        |
|-----|------------------------------------------------------------------------------------------------------------------------------------------------------------------------|----------|-----------|-----------|-------|------|-------|---------|------|--------|----------------|
|     | 248                                                                                                                                                                    | 431.7734 | 861.5323  | 861.5324  | -0.06 | 0    | 34    | 0.00064 | 1    | U      | K.LQTIFLK.Y    |
| 13. | MK67I_MOUSE Mass: 36242 Score: 33 Matches: 1(1) Sequences: 1(1) emPAI: 0.13<br>MKI67 FHA domain-interacting nucleolar phosphoprotein OS=Mus musculus GN=Nifk PE=1 SV=1 |          |           |           |       |      |       |         |      |        |                |
|     | 288                                                                                                                                                                    | 443.7591 | 885.5036  | 885.5032  | 0.41  | 0    | 33    | 0.004   | 1    | U      | K.ALTQIQGR.T   |
| 14. | PPR21_MOUSE Mass: 88282 Score: 31 Matches: 1(1) Sequences: 1(1) emPAI: 0.05<br>Protein phosphatase 1 regulatory subunit 21 OS=Mus musculus GN=Ppp1r21 PE=1 SV=2        |          |           |           |       |      |       |         |      |        |                |
|     | 576                                                                                                                                                                    | 501.8209 | 1001.6273 | 1001.6273 | 0.03  | 1    | 31    | 0.001   | 1    | U      | R.KILPYQLK.S   |
| 15. | RCOR3_MOUSE Mass: 49748 Score: 31 Matches: 3(3) Sequences: 1(1) emPAI: 0.19<br>REST corepressor 3 OS=Mus musculus GN=Rcor3 PE=1 SV=2                                   |          |           |           |       |      |       |         |      |        |                |
|     | 56                                                                                                                                                                     | 371.7083 | 741.4020  | 741.4021  | -0.12 | 0    | (16)  | 0.029   | 3    | U      | K.QVNSALK.Q    |
|     | 81                                                                                                                                                                     | 380.2236 | 758.4326  | 758.4286  | 5.29  | 0    | 28    | 0.013   | 1    | U      | K.QVNSALK.Q 80 |
| 16. | ADRM1_MOUSE Mass: 42034 Score: 30 Matches: 1(1) Sequences: 1(1) emPAI: 0.11<br>Proteasomal ubiquitin receptor ADRM1 OS=Mus musculus GN=Adrm1 PE=1 SV=2                 |          |           |           |       |      |       |         |      |        |                |
|     | 70                                                                                                                                                                     | 375.7127 | 749.4109  | 749.4105  | 0.52  | 1    | 30    | 0.002   | 1    | U      | R.AGKMSLK.G    |
| 17. | MTEF3_MOUSE Mass: 47328 Score: 30 Matches: 1(1) Sequences: 1(1) emPAI: 0.10<br>Transcription termination factor 3, mitochondrial OS=Mus musculus GN=Mterf3 PE=2 SV=1   |          |           |           |       |      |       |         |      |        |                |
|     | 274                                                                                                                                                                    | 437.7916 | 873.5686  | 873.5688  | -0.22 | 0    | 30    | 0.00093 | 1    | U      | K.QILLFLK.D    |
| 18. | CCL19_MOUSE Mass: 11903 Score: 30 Matches: 1(1) Sequences: 1(1) emPAI: 0.42<br>C-C motif chemokine 19 OS=Mus musculus GN=Ccl19 PE=1 SV=1                               |          |           |           |       |      |       |         |      |        |                |
|     | 84                                                                                                                                                                     | 381.2495 | 760.4845  | 760.4807  | 5.02  | 2    | 30    | 0.00098 | 1    | U      | R.LKKSSAK.N    |



|     |                                                                                                             |          |           |           |       |      |       |        |      |        |                    |
|-----|-------------------------------------------------------------------------------------------------------------|----------|-----------|-----------|-------|------|-------|--------|------|--------|--------------------|
| 19. | VGLL3_MOUSE Mass: 35976 Score: 30 Matches: 1(1) Sequences: 1(1) emPAI: 0.13                                 |          |           |           |       |      |       |        |      |        |                    |
|     | Transcription cofactor vestigial-like protein 3 OS=Mus musculus GN=Vgl3 PE=2 SV=1                           |          |           |           |       |      |       |        |      |        |                    |
|     | Query                                                                                                       | Observed | Mr(expt)  | Mr(calc)  | ppm   | Miss | Score | Expect | Rank | Unique | Peptide            |
|     | 909                                                                                                         | 571.7943 | 1141.5741 | 1141.5801 | -5.32 | 0    | 30    | 0.009  | 1    | U      | R.IPAPQCDITK.T     |
| 20. | WDR12_MOUSE Mass: 47317 Score: 30 Matches: 1(1) Sequences: 1(1) emPAI: 0.10                                 |          |           |           |       |      |       |        |      |        |                    |
|     | Ribosome biogenesis protein WDR12 OS=Mus musculus GN=Wdr12 PE=1 SV=1                                        |          |           |           |       |      |       |        |      |        |                    |
|     | Query                                                                                                       | Observed | Mr(expt)  | Mr(calc)  | ppm   | Miss | Score | Expect | Rank | Unique | Peptide            |
|     | 927                                                                                                         | 574.3108 | 1146.6071 | 1146.6073 | -0.17 | 0    | 30    | 0.013  | 1    | U      | K.HVEFDFLIK.G      |
| 21. | MED1_MOUSE Mass: 167036 Score: 29 Matches: 1(1) Sequences: 1(1) emPAI: 0.03                                 |          |           |           |       |      |       |        |      |        |                    |
|     | Mediator of RNA polymerase II transcription subunit 1 OS=Mus musculus GN=Med1 PE=1 SV=2                     |          |           |           |       |      |       |        |      |        |                    |
|     | Query                                                                                                       | Observed | Mr(expt)  | Mr(calc)  | ppm   | Miss | Score | Expect | Rank | Unique | Peptide            |
|     | 3294                                                                                                        | 507.2599 | 1518.7578 | 1518.7579 | -0.10 | 0    | 29    | 0.019  | 1    | U      | K.FNQNRPWSETIK.L   |
| 22. | XIRP2_MOUSE Mass: 427993 Score: 28 Matches: 1(1) Sequences: 1(1) emPAI: 0.01                                |          |           |           |       |      |       |        |      |        |                    |
|     | Xin actin-binding repeat-containing protein 2 OS=Mus musculus GN=Xirp2 PE=1 SV=1                            |          |           |           |       |      |       |        |      |        |                    |
|     | Query                                                                                                       | Observed | Mr(expt)  | Mr(calc)  | ppm   | Miss | Score | Expect | Rank | Unique | Peptide            |
|     | 5161                                                                                                        | 856.9664 | 1711.9182 | 1711.9153 | 1.67  | 2    | 28    | 0.013  | 1    | U      | K.LKIVWPPCQEMPCK.N |
| 23. | MMAD_MOUSE Mass: 32974 Score: 28 Matches: 1(1) Sequences: 1(1) emPAI: 0.14                                  |          |           |           |       |      |       |        |      |        |                    |
|     | Methylmalonic aciduria and homocystinuria type D homolog, mitochondrial OS=Mus musculus GN=Mmadhc PE=1 SV=1 |          |           |           |       |      |       |        |      |        |                    |
|     | Query                                                                                                       | Observed | Mr(expt)  | Mr(calc)  | ppm   | Miss | Score | Expect | Rank | Unique | Peptide            |
|     | 667                                                                                                         | 531.8132 | 1061.6119 | 1061.6155 | -3.35 | 0    | 28    | 0.0066 | 1    | U      | K.LMILTVTQK.T      |
| 24. | PDIA6_MOUSE Mass: 48070 Score: 28 Matches: 1(1) Sequences: 1(1) emPAI: 0.09                                 |          |           |           |       |      |       |        |      |        |                    |
|     | Protein disulfide-isomerase A6 OS=Mus musculus GN=Pdia6 PE=1 SV=3                                           |          |           |           |       |      |       |        |      |        |                    |
|     | Query                                                                                                       | Observed | Mr(expt)  | Mr(calc)  | ppm   | Miss | Score | Expect | Rank | Unique | Peptide            |
|     | 507                                                                                                         | 489.8103 | 977.6060  | 977.6096  | -3.59 | 2    | 28    | 0.0029 | 1    | U      | R.KMKFALLK.G       |
| 25. | GT2D2_MOUSE Mass: 104511 Score: 28 Matches: 1(1) Sequences: 1(1) emPAI: 0.04                                |          |           |           |       |      |       |        |      |        |                    |
|     | General transcription factor II-I repeat domain-containing protein 2 OS=Mus musculus GN=Gtf2ird2 PE=2 SV=1  |          |           |           |       |      |       |        |      |        |                    |
|     | Query                                                                                                       | Observed | Mr(expt)  | Mr(calc)  | ppm   | Miss | Score | Expect | Rank | Unique | Peptide            |
|     | 45                                                                                                          | 367.2157 | 732.4169  | 732.4204  | -4.72 | 0    | 28    | 0.005  | 1    | U      | R.AAAMLIK.T        |

|     |                                                                                                                                                                                                 |          |           |           |       |      |       |        |      |        |                         |
|-----|-------------------------------------------------------------------------------------------------------------------------------------------------------------------------------------------------|----------|-----------|-----------|-------|------|-------|--------|------|--------|-------------------------|
| 26. | BCAR1_MOUSE Mass: 94227 Score: 28 Matches: 2(2) Sequences: 1(1) emPAI: 0.05<br>Breast cancer anti-estrogen resistance protein 1 OS=Mus musculus GN=Bcar1 PE=1 SV=2                              |          |           |           |       |      |       |        |      |        |                         |
|     | Query                                                                                                                                                                                           | Observed | Mr(expt)  | Mr(calc)  | ppm   | Miss | Score | Expect | Rank | Unique | Peptide                 |
|     | 1059                                                                                                                                                                                            | 598.3398 | 1194.6650 | 1194.6682 | -2.68 | 1    | 26    | 0.016  | 1    | U      | R.LKILVGMYSK.K 1057     |
| 27. | ARLY_MOUSE Mass: 51707 Score: 27 Matches: 1(1) Sequences: 1(1) emPAI: 0.09<br>Argininosuccinate lyase OS=Mus musculus GN=Asl PE=1 SV=1                                                          |          |           |           |       |      |       |        |      |        |                         |
|     | Query                                                                                                                                                                                           | Observed | Mr(expt)  | Mr(calc)  | ppm   | Miss | Score | Expect | Rank | Unique | Peptide                 |
|     | 1507                                                                                                                                                                                            | 642.8795 | 1283.7445 | 1283.7561 | -9.04 | 2    | 27    | 0.01   | 1    | U      | R.RLKELIGEAGK.L         |
| 28. | ANCHR_MOUSE Mass: 43245 Score: 27 Matches: 1(1) Sequences: 1(1) emPAI: 0.10<br>Abscission/NoCut checkpoint regulator OS=Mus musculus GN=Zfyve19 PE=1 SV=2                                       |          |           |           |       |      |       |        |      |        |                         |
|     | Query                                                                                                                                                                                           | Observed | Mr(expt)  | Mr(calc)  | ppm   | Miss | Score | Expect | Rank | Unique | Peptide                 |
|     | 1071                                                                                                                                                                                            | 599.3693 | 1196.7241 | 1196.7353 | -9.36 | 2    | 27    | 0.0062 | 1    | U      | R.QERILALAKR.L          |
| 29. | ANR28_MOUSE Mass: 112826 Score: 27 Matches: 2(2) Sequences: 1(1) emPAI: 0.04<br>Serine/threonine-protein phosphatase 6 regulatory ankyrin repeat subunit A OS=Mus musculus GN=Ankrd28 PE=1 SV=1 |          |           |           |       |      |       |        |      |        |                         |
|     | Query                                                                                                                                                                                           | Observed | Mr(expt)  | Mr(calc)  | ppm   | Miss | Score | Expect | Rank | Unique | Peptide                 |
|     | 4204                                                                                                                                                                                            | 809.4370 | 1616.8595 | 1616.8443 | 9.36  | 0    | 26    | 0.029  | 1    | U      | R.AVASCSEEAQILLK.H 4207 |
| 30. | ANGP4_MOUSE Mass: 57769 Score: 27 Matches: 1(1) Sequences: 1(1) emPAI: 0.08<br>Angiopoietin-4 OS=Mus musculus GN=Angpt4 PE=1 SV=1                                                               |          |           |           |       |      |       |        |      |        |                         |
|     | Query                                                                                                                                                                                           | Observed | Mr(expt)  | Mr(calc)  | ppm   | Miss | Score | Expect | Rank | Unique | Peptide                 |
|     | 312                                                                                                                                                                                             | 455.2140 | 908.4134  | 908.4208  | -8.11 | 0    | 27    | 0.012  | 1    | U      | R.QMLMQSR.E             |
| 31. | RGS9_MOUSE Mass: 76929 Score: 27 Matches: 1(1) Sequences: 1(1) emPAI: 0.06<br>Regulator of G-protein signaling 9 OS=Mus musculus GN=Rgs9 PE=1 SV=3                                              |          |           |           |       |      |       |        |      |        |                         |
|     | Query                                                                                                                                                                                           | Observed | Mr(expt)  | Mr(calc)  | ppm   | Miss | Score | Expect | Rank | Unique | Peptide                 |
|     | 915                                                                                                                                                                                             | 572.3058 | 1142.5970 | 1142.6084 | -9.92 | 2    | 27    | 0.023  | 1    | U      | K.KDSYARYLK.S           |
| 32. | ADCY7_MOUSE Mass: 122628 Score: 27 Matches: 1(1) Sequences: 1(1) emPAI: 0.04<br>Adenylate cyclase type 7 OS=Mus musculus GN=Adcy7 PE=2 SV=2                                                     |          |           |           |       |      |       |        |      |        |                         |
|     | Query                                                                                                                                                                                           | Observed | Mr(expt)  | Mr(calc)  | ppm   | Miss | Score | Expect | Rank | Unique | Peptide                 |

|     |                                                                                                                                                                             |          |           |           |       |      |       |        |      |        |                  |
|-----|-----------------------------------------------------------------------------------------------------------------------------------------------------------------------------|----------|-----------|-----------|-------|------|-------|--------|------|--------|------------------|
|     | 795                                                                                                                                                                         | 554.7768 | 1107.5390 | 1107.5304 | 7.79  | 0    | 27    | 0.022  | 1    | U      | K.MGLDICEAIK.Q   |
| 33. | ITPR3_MOUSE Mass: 304080 Score: 27 Matches: 2(2) Sequences: 2(2) emPAI: 0.03<br>Inositol 1,4,5-trisphosphate receptor type 3 OS=Mus musculus GN=Itp3 PE=1 SV=3              |          |           |           |       |      |       |        |      |        |                  |
|     | Query                                                                                                                                                                       | Observed | Mr(expt)  | Mr(calc)  | ppm   | Miss | Score | Expect | Rank | Unique | Peptide          |
|     | 81                                                                                                                                                                          | 380.2236 | 758.4326  | 758.4286  | 5.31  | 1    | 25    | 0.024  | 2    | U      | R.NAGEKIK.Y      |
|     | 147                                                                                                                                                                         | 400.7221 | 799.4297  | 799.4300  | -0.46 | 0    | 21    | 0.028  | 1    | U      | K.AAGLGAQGR.T    |
| 34. | CBX2_MOUSE Mass: 54885 Score: 27 Matches: 1(1) Sequences: 1(1) emPAI: 0.08<br>Chromobox protein homolog 2 OS=Mus musculus GN=Cbx2 PE=1 SV=2                                 |          |           |           |       |      |       |        |      |        |                  |
|     | Query                                                                                                                                                                       | Observed | Mr(expt)  | Mr(calc)  | ppm   | Miss | Score | Expect | Rank | Unique | Peptide          |
|     | 173                                                                                                                                                                         | 409.7241 | 817.4337  | 817.4368  | -3.77 | 0    | 27    | 0.026  | 1    | U      | K.CGLGLDLK.V     |
| 35. | HMCS2_MOUSE Mass: 56786 Score: 27 Matches: 1(1) Sequences: 1(1) emPAI: 0.08<br>Hydroxymethylglutaryl-CoA synthase, mitochondrial OS=Mus musculus GN=Hmgcs2 PE=1 SV=2        |          |           |           |       |      |       |        |      |        |                  |
|     | Query                                                                                                                                                                       | Observed | Mr(expt)  | Mr(calc)  | ppm   | Miss | Score | Expect | Rank | Unique | Peptide          |
|     | 696                                                                                                                                                                         | 536.3113 | 1070.6081 | 1070.6019 | 5.86  | 1    | 27    | 0.019  | 1    | U      | -.MQRLLAPAR.R    |
| 36. | PKHG6_MOUSE Mass: 89093 Score: 27 Matches: 2(2) Sequences: 1(1) emPAI: 0.05<br>Pleckstrin homology domain-containing family G member 6 OS=Mus musculus GN=Plekhg6 PE=2 SV=2 |          |           |           |       |      |       |        |      |        |                  |
|     | Query                                                                                                                                                                       | Observed | Mr(expt)  | Mr(calc)  | ppm   | Miss | Score | Expect | Rank | Unique | Peptide          |
|     | 430                                                                                                                                                                         | 471.7902 | 941.5658  | 941.5658  | -0.03 | 0    | 26    | 0.014  | 1    | U      | R.LTLAQLQR.M 429 |
| 37. | FAS_MOUSE Mass: 272257 Score: 26 Matches: 1(1) Sequences: 1(1) emPAI: 0.02<br>Fatty acid synthase OS=Mus musculus GN=Fasn PE=1 SV=2                                         |          |           |           |       |      |       |        |      |        |                  |
|     | Query                                                                                                                                                                       | Observed | Mr(expt)  | Mr(calc)  | ppm   | Miss | Score | Expect | Rank | Unique | Peptide          |
|     | 170                                                                                                                                                                         | 408.7341 | 815.4537  | 815.4541  | -0.52 | 0    | 26    | 0.032  | 1    | U      | R.WVSSPLK.H      |
| 38. | ZFAN4_MOUSE Mass: 81502 Score: 26 Matches: 2(2) Sequences: 1(1) emPAI: 0.05<br>AN1-type zinc finger protein 4 OS=Mus musculus GN=Zfand4 PE=4 SV=2                           |          |           |           |       |      |       |        |      |        |                  |
|     | Query                                                                                                                                                                       | Observed | Mr(expt)  | Mr(calc)  | ppm   | Miss | Score | Expect | Rank | Unique | Peptide          |
|     | 193                                                                                                                                                                         | 416.2762 | 830.5378  | 830.5411  | -4.01 | 2    | 22    | 0.013  | 1    | U      | K.MKLLKAK.M 192  |
| 39. | DSCR6_MOUSE Mass: 16954 Score: 26 Matches: 1(1) Sequences: 1(1) emPAI: 0.28                                                                                                 |          |           |           |       |      |       |        |      |        |                  |

|     |                                                                                                                                                                   |          |           |           |       |      |       |        |      |        |                 |
|-----|-------------------------------------------------------------------------------------------------------------------------------------------------------------------|----------|-----------|-----------|-------|------|-------|--------|------|--------|-----------------|
|     | Protein ripply3 OS=Mus musculus GN=Ripply3 PE=1 SV=2                                                                                                              |          |           |           |       |      |       |        |      |        |                 |
|     | Query                                                                                                                                                             | Observed | Mr(expt)  | Mr(calc)  | ppm   | Miss | Score | Expect | Rank | Unique | Peptide         |
|     | 196                                                                                                                                                               | 417.6836 | 833.3526  | 833.3515  | 1.28  | 0    | 26    | 0.0052 | 1    | U      | R.DSAQEER.A     |
| 40. | PDE7B_MOUSE Mass: 51304 Score: 26 Matches: 1(1) Sequences: 1(1) emPAI: 0.09<br>cAMP-specific 3',5'-cyclic phosphodiesterase 7B OS=Mus musculus GN=Pde7b PE=1 SV=1 |          |           |           |       |      |       |        |      |        |                 |
|     | Query                                                                                                                                                             | Observed | Mr(expt)  | Mr(calc)  | ppm   | Miss | Score | Expect | Rank | Unique | Peptide         |
|     | 772                                                                                                                                                               | 550.7341 | 1099.4536 | 1099.4460 | 6.86  | 0    | 26    | 0.012  | 1    | U      | K.CVCMLGDVR.L   |
| 41. | NIM1_MOUSE Mass: 49746 Score: 25 Matches: 1(1) Sequences: 1(1) emPAI: 0.09<br>Serine/threonine-protein kinase NIM1 OS=Mus musculus GN=Nim1k PE=2 SV=1             |          |           |           |       |      |       |        |      |        |                 |
|     | Query                                                                                                                                                             | Observed | Mr(expt)  | Mr(calc)  | ppm   | Miss | Score | Expect | Rank | Unique | Peptide         |
|     | 246                                                                                                                                                               | 431.7369 | 861.4593  | 861.4596  | -0.33 | 0    | 25    | 0.026  | 1    | U      | R.QLTPFEK.L     |
| 42. | KI26A_MOUSE Mass: 196191 Score: 25 Matches: 1(1) Sequences: 1(1) emPAI: 0.02<br>Kinesin-like protein KIF26A OS=Mus musculus GN=Kif26a PE=1 SV=2                   |          |           |           |       |      |       |        |      |        |                 |
|     | Query                                                                                                                                                             | Observed | Mr(expt)  | Mr(calc)  | ppm   | Miss | Score | Expect | Rank | Unique | Peptide         |
|     | 309                                                                                                                                                               | 451.7708 | 901.5269  | 901.5345  | -8.36 | 2    | 25    | 0.033  | 1    | U      | R.SRSLKSPK.K    |
| 43. | CC162_MOUSE Mass: 104270 Score: 25 Matches: 1(1) Sequences: 1(1) emPAI: 0.04<br>Coiled-coil domain-containing protein 162 OS=Mus musculus GN=Ccdc162p PE=1 SV=4   |          |           |           |       |      |       |        |      |        |                 |
|     | Query                                                                                                                                                             | Observed | Mr(expt)  | Mr(calc)  | ppm   | Miss | Score | Expect | Rank | Unique | Peptide         |
|     | 1625                                                                                                                                                              | 656.8426 | 1311.6706 | 1311.6744 | -2.88 | 1    | 25    | 0.035  | 1    | U      | R.EMTLFLSEKSK.E |
| 44. | DLK1_MOUSE Mass: 41292 Score: 25 Matches: 1(1) Sequences: 1(1) emPAI: 0.11<br>Protein delta homolog 1 OS=Mus musculus GN=Dlk1 PE=1 SV=1                           |          |           |           |       |      |       |        |      |        |                 |
|     | Query                                                                                                                                                             | Observed | Mr(expt)  | Mr(calc)  | ppm   | Miss | Score | Expect | Rank | Unique | Peptide         |
|     | 167                                                                                                                                                               | 407.7608 | 813.5070  | 813.5072  | -0.21 | 0    | 25    | 0.02   | 1    | U      | M.IATGALLR.V    |
| 45. | DYHC1_MOUSE Mass: 531710 Score: 25 Matches: 1(1) Sequences: 1(1) emPAI: 0.01<br>Cytoplasmic dynein 1 heavy chain 1 OS=Mus musculus GN=Dync1h1 PE=1 SV=2           |          |           |           |       |      |       |        |      |        |                 |
|     | Query                                                                                                                                                             | Observed | Mr(expt)  | Mr(calc)  | ppm   | Miss | Score | Expect | Rank | Unique | Peptide         |
|     | 148                                                                                                                                                               | 401.2087 | 800.4029  | 800.4028  | 0.06  | 0    | 25    | 0.015  | 1    | U      | R.QNISPDK.I     |

|     |                                                                                                                           |              |           |               |                 |             |       |        |      |        |                   |
|-----|---------------------------------------------------------------------------------------------------------------------------|--------------|-----------|---------------|-----------------|-------------|-------|--------|------|--------|-------------------|
| 46. | TEAN2_MOUSE                                                                                                               | Mass: 24185  | Score: 25 | Matches: 2(2) | Sequences: 1(1) | emPAI: 0.19 |       |        |      |        |                   |
|     | Transcription elongation factor A N-terminal and central domain-containing protein 2 OS=Mus musculus GN=Tceanc2 PE=2 SV=2 |              |           |               |                 |             |       |        |      |        |                   |
|     | Query                                                                                                                     | Observed     | Mr(expt)  | Mr(calc)      | ppm             | Miss        | Score | Expect | Rank | Unique | Peptide           |
|     | 136                                                                                                                       | 396.2548     | 790.4950  | 790.4953      | -0.31           | 0           | 20    | 0.011  | 1    | U      | R.ALVFTLK.H 138   |
| 47. | GOGA1_MOUSE                                                                                                               | Mass: 87284  | Score: 25 | Matches: 1(1) | Sequences: 1(1) | emPAI: 0.05 |       |        |      |        |                   |
|     | Golgin subfamily A member 1 OS=Mus musculus GN=Golga1 PE=1 SV=2                                                           |              |           |               |                 |             |       |        |      |        |                   |
|     | Query                                                                                                                     | Observed     | Mr(expt)  | Mr(calc)      | ppm             | Miss        | Score | Expect | Rank | Unique | Peptide           |
|     | 2929                                                                                                                      | 740.3970     | 1478.7795 | 1478.7762     | 2.22            | 2           | 25    | 0.041  | 1    | U      | K.LQRELEALKTCK.A  |
| 48. | LBR_MOUSE                                                                                                                 | Mass: 71395  | Score: 24 | Matches: 1(1) | Sequences: 1(1) | emPAI: 0.06 |       |        |      |        |                   |
|     | Lamin-B receptor OS=Mus musculus GN=Lbr PE=1 SV=2                                                                         |              |           |               |                 |             |       |        |      |        |                   |
|     | Query                                                                                                                     | Observed     | Mr(expt)  | Mr(calc)      | ppm             | Miss        | Score | Expect | Rank | Unique | Peptide           |
|     | 284                                                                                                                       | 443.2795     | 884.5444  | 884.5443      | 0.09            | 1           | 24    | 0.018  | 1    | U      | R.REILQVK.L       |
| 49. | RPA1_MOUSE                                                                                                                | Mass: 193987 | Score: 24 | Matches: 1(1) | Sequences: 1(1) | emPAI: 0.02 |       |        |      |        |                   |
|     | DNA-directed RNA polymerase I subunit RPA1 OS=Mus musculus GN=Polr1a PE=1 SV=2                                            |              |           |               |                 |             |       |        |      |        |                   |
|     | Query                                                                                                                     | Observed     | Mr(expt)  | Mr(calc)      | ppm             | Miss        | Score | Expect | Rank | Unique | Peptide           |
|     | 1222                                                                                                                      | 614.8157     | 1227.6168 | 1227.6281     | -9.24           | 1           | 24    | 0.035  | 1    | U      | R.SGYLQRCIIK.H    |
| 50. | M3K6_MOUSE                                                                                                                | Mass: 142964 | Score: 24 | Matches: 1(1) | Sequences: 1(1) | emPAI: 0.03 |       |        |      |        |                   |
|     | Mitogen-activated protein kinase kinase kinase 6 OS=Mus musculus GN=Map3k6 PE=1 SV=4                                      |              |           |               |                 |             |       |        |      |        |                   |
|     | Query                                                                                                                     | Observed     | Mr(expt)  | Mr(calc)      | ppm             | Miss        | Score | Expect | Rank | Unique | Peptide           |
|     | 868                                                                                                                       | 563.8506     | 1125.6867 | 1125.6771     | 8.60            | 1           | 24    | 0.009  | 1    | U      | R.IWRAILAQR.A     |
| 51. | PRP8_MOUSE                                                                                                                | Mass: 273443 | Score: 24 | Matches: 1(1) | Sequences: 1(1) | emPAI: 0.02 |       |        |      |        |                   |
|     | Pre-mRNA-processing-splicing factor 8 OS=Mus musculus GN=Prpf8 PE=1 SV=2                                                  |              |           |               |                 |             |       |        |      |        |                   |
|     | Query                                                                                                                     | Observed     | Mr(expt)  | Mr(calc)      | ppm             | Miss        | Score | Expect | Rank | Unique | Peptide           |
|     | 2129                                                                                                                      | 692.8587     | 1383.7028 | 1383.7068     | -2.86           | 0           | 24    | 0.046  | 1    | U      | R.QILMASGSTTFTK.I |
| 52. | RIMS1_MOUSE                                                                                                               | Mass: 163061 | Score: 24 | Matches: 1(1) | Sequences: 1(1) | emPAI: 0.03 |       |        |      |        |                   |
|     | Regulating synaptic membrane exocytosis protein 1 OS=Mus musculus GN=Rims1 PE=1 SV=2                                      |              |           |               |                 |             |       |        |      |        |                   |
|     | Query                                                                                                                     | Observed     | Mr(expt)  | Mr(calc)      | ppm             | Miss        | Score | Expect | Rank | Unique | Peptide           |
|     | 69                                                                                                                        | 375.2315     | 748.4485  | 748.4483      | 0.20            | 0           | 24    | 0.004  | 1    | U      | R.LGAFITK.V       |

|     |                                                                                                                                                                         |          |           |           |       |      |       |        |      |        |                 |
|-----|-------------------------------------------------------------------------------------------------------------------------------------------------------------------------|----------|-----------|-----------|-------|------|-------|--------|------|--------|-----------------|
| 53. | LMOD2_MOUSE Mass: 61980 Score: 24 Matches: 1(1) Sequences: 1(1) emPAI: 0.07<br>Leiomodin-2 OS=Mus musculus GN=Lmod2 PE=1 SV=1                                           |          |           |           |       |      |       |        |      |        |                 |
|     | Query                                                                                                                                                                   | Observed | Mr(expt)  | Mr(calc)  | ppm   | Miss | Score | Expect | Rank | Unique | Peptide         |
|     | 185                                                                                                                                                                     | 413.7466 | 825.4786  | 825.4708  | 9.43  | 0    | 24    | 0.021  | 1    | U      | K.QPNNILK.E     |
| 54. | CD158_MOUSE Mass: 126748 Score: 24 Matches: 1(1) Sequences: 1(1) emPAI: 0.03<br>Coiled-coil domain-containing protein 158 OS=Mus musculus GN=Ccdc158 PE=2 SV=1          |          |           |           |       |      |       |        |      |        |                 |
|     | Query                                                                                                                                                                   | Observed | Mr(expt)  | Mr(calc)  | ppm   | Miss | Score | Expect | Rank | Unique | Peptide         |
|     | 1639                                                                                                                                                                    | 657.3621 | 1312.7096 | 1312.7099 | -0.25 | 1    | 24    | 0.045  | 1    | U      | R.TPSLGALEDVR.D |
| 55. | CC177_MOUSE Mass: 79809 Score: 23 Matches: 1(1) Sequences: 1(1) emPAI: 0.06<br>Coiled-coil domain-containing protein 177 OS=Mus musculus GN=Ccdc177 PE=1 SV=1           |          |           |           |       |      |       |        |      |        |                 |
|     | Query                                                                                                                                                                   | Observed | Mr(expt)  | Mr(calc)  | ppm   | Miss | Score | Expect | Rank | Unique | Peptide         |
|     | 1020                                                                                                                                                                    | 592.3615 | 1182.7085 | 1182.7197 | -9.45 | 2    | 23    | 0.022  | 1    | U      | R.RELLQAIGRK.L  |
| 56. | IMP4_MOUSE Mass: 33635 Score: 23 Matches: 1(1) Sequences: 1(1) emPAI: 0.14<br>U3 small nucleolar ribonucleoprotein protein IMP4 OS=Mus musculus GN=Imp4 PE=2 SV=1       |          |           |           |       |      |       |        |      |        |                 |
|     | Query                                                                                                                                                                   | Observed | Mr(expt)  | Mr(calc)  | ppm   | Miss | Score | Expect | Rank | Unique | Peptide         |
|     | 791                                                                                                                                                                     | 554.3318 | 1106.6490 | 1106.6521 | -2.82 | 2    | 23    | 0.016  | 1    | U      | R.LKMFAKELK.L   |
| 57. | RFX6_MOUSE Mass: 102501 Score: 23 Matches: 1(1) Sequences: 1(1) emPAI: 0.04<br>DNA-binding protein RFX6 OS=Mus musculus GN=Rfx6 PE=1 SV=2                               |          |           |           |       |      |       |        |      |        |                 |
|     | Query                                                                                                                                                                   | Observed | Mr(expt)  | Mr(calc)  | ppm   | Miss | Score | Expect | Rank | Unique | Peptide         |
|     | 197                                                                                                                                                                     | 417.7395 | 833.4644  | 833.4647  | -0.36 | 0    | 23    | 0.033  | 1    | U      | R.AQDFLLK.W     |
| 58. | CAMP2_MOUSE Mass: 164230 Score: 23 Matches: 1(1) Sequences: 1(1) emPAI: 0.03<br>Calmodulin-regulated spectrin-associated protein 2 OS=Mus musculus GN=Camsap2 PE=1 SV=3 |          |           |           |       |      |       |        |      |        |                 |
|     | Query                                                                                                                                                                   | Observed | Mr(expt)  | Mr(calc)  | ppm   | Miss | Score | Expect | Rank | Unique | Peptide         |
|     | 514                                                                                                                                                                     | 491.2738 | 980.5330  | 980.5365  | -3.53 | 1    | 23    | 0.034  | 1    | U      | K.KMIEGLYK.Y    |
| 59. | BI1_MOUSE Mass: 26460 Score: 23 Matches: 1(1) Sequences: 1(1) emPAI: 0.18<br>Bax inhibitor 1 OS=Mus musculus GN=Tmbim6 PE=1 SV=1                                        |          |           |           |       |      |       |        |      |        |                 |
|     | Query                                                                                                                                                                   | Observed | Mr(expt)  | Mr(calc)  | ppm   | Miss | Score | Expect | Rank | Unique | Peptide         |

|     |                                                                                                                                                                          |          |           |           |       |      |       |        |      |        |                 |
|-----|--------------------------------------------------------------------------------------------------------------------------------------------------------------------------|----------|-----------|-----------|-------|------|-------|--------|------|--------|-----------------|
|     | 1835                                                                                                                                                                     | 668.3874 | 1334.7602 | 1334.7632 | -2.19 | 1    | 23    | 0.027  | 1    | U      | R.KLMLILAFNEK.D |
| 60. | MSL2_MOUSE Mass: 62497 Score: 23 Matches: 1(1) Sequences: 1(1) emPAI: 0.07<br>E3 ubiquitin-protein ligase MSL2 OS=Mus musculus GN=Msl2 PE=2 SV=2                         |          |           |           |       |      |       |        |      |        |                 |
|     | Query                                                                                                                                                                    | Observed | Mr(expt)  | Mr(calc)  | ppm   | Miss | Score | Expect | Rank | Unique | Peptide         |
|     | 570                                                                                                                                                                      | 501.1999 | 1000.3853 | 1000.3776 | 7.68  | 0    | 23    | 0.01   | 1    | U      | K.ACLDCICR.G    |
| 61. | LRIF1_MOUSE Mass: 82946 Score: 22 Matches: 1(1) Sequences: 1(1) emPAI: 0.05<br>Ligand-dependent nuclear receptor-interacting factor 1 OS=Mus musculus GN=Lrif1 PE=2 SV=2 |          |           |           |       |      |       |        |      |        |                 |
|     | Query                                                                                                                                                                    | Observed | Mr(expt)  | Mr(calc)  | ppm   | Miss | Score | Expect | Rank | Unique | Peptide         |
|     | 253                                                                                                                                                                      | 432.7505 | 863.4865  | 863.4865  | 0.01  | 0    | 22    | 0.032  | 1    | U      | K.IPAHAEVK.S    |
| 62. | SPD2B_MOUSE Mass: 101454 Score: 22 Matches: 1(1) Sequences: 1(1) emPAI: 0.04<br>SH3 and PX domain-containing protein 2B OS=Mus musculus GN=Sh3pxd2b PE=1 SV=1            |          |           |           |       |      |       |        |      |        |                 |
|     | Query                                                                                                                                                                    | Observed | Mr(expt)  | Mr(calc)  | ppm   | Miss | Score | Expect | Rank | Unique | Peptide         |
|     | 60                                                                                                                                                                       | 372.6979 | 743.3812  | 743.3814  | -0.21 | 0    | 22    | 0.013  | 1    | U      | R.QDGLSPK.E     |
| 63. | KLDC3_MOUSE Mass: 43054 Score: 22 Matches: 1(1) Sequences: 1(1) emPAI: 0.11<br>Kelch domain-containing protein 3 OS=Mus musculus GN=Klhdc3 PE=2 SV=1                     |          |           |           |       |      |       |        |      |        |                 |
|     | Query                                                                                                                                                                    | Observed | Mr(expt)  | Mr(calc)  | ppm   | Miss | Score | Expect | Rank | Unique | Peptide         |
|     | 260                                                                                                                                                                      | 435.7375 | 869.4604  | 869.4654  | -5.69 | 2    | 22    | 0.028  | 1    | U      | K.GKGPCPRR.R    |
| 64. | CROCC_MOUSE Mass: 226809 Score: 22 Matches: 1(1) Sequences: 1(1) emPAI: 0.02<br>Rootletin OS=Mus musculus GN=Crocc PE=1 SV=2                                             |          |           |           |       |      |       |        |      |        |                 |
|     | Query                                                                                                                                                                    | Observed | Mr(expt)  | Mr(calc)  | ppm   | Miss | Score | Expect | Rank | Unique | Peptide         |
|     | 1634                                                                                                                                                                     | 656.8827 | 1311.7509 | 1311.7623 | -8.62 | 1    | 22    | 0.043  | 1    | U      | R.LLQERLGSLQR.A |
| 65. | IQEC2_MOUSE Mass: 161687 Score: 22 Matches: 1(1) Sequences: 1(1) emPAI: 0.03<br>IQ motif and SEC7 domain-containing protein 2 OS=Mus musculus GN=Iqsec2 PE=1 SV=3        |          |           |           |       |      |       |        |      |        |                 |
|     | Query                                                                                                                                                                    | Observed | Mr(expt)  | Mr(calc)  | ppm   | Miss | Score | Expect | Rank | Unique | Peptide         |
|     | 585                                                                                                                                                                      | 505.2713 | 1008.5280 | 1008.5314 | -3.37 | 1    | 22    | 0.044  | 1    | U      | K.MKLDDFIK.N    |
| 66. | ATAD5_MOUSE Mass: 203783 Score: 22 Matches: 1(1) Sequences: 1(1) emPAI: 0.02<br>ATPase family AAA domain-containing protein 5 OS=Mus musculus GN=Atad5 PE=1 SV=1         |          |           |           |       |      |       |        |      |        |                 |

|     | Query                                                                                                                                                              | Observed | Mr(expt)  | Mr(calc)  | ppm   | Miss | Score | Expect | Rank | Unique | Peptide         |
|-----|--------------------------------------------------------------------------------------------------------------------------------------------------------------------|----------|-----------|-----------|-------|------|-------|--------|------|--------|-----------------|
|     | 226                                                                                                                                                                | 427.2627 | 852.5109  | 852.5069  | 4.72  | 1    | 22    | 0.023  | 1    | U      | R.KLPPSSPK.T    |
| 67. | TAF4B_MOUSE Mass: 90028 Score: 22 Matches: 1(1) Sequences: 1(1) emPAI: 0.05<br>Transcription initiation factor TFIID subunit 4B OS=Mus musculus GN=Taf4b PE=2 SV=1 |          |           |           |       |      |       |        |      |        |                 |
|     | 513                                                                                                                                                                | 491.2737 | 980.5328  | 980.5365  | -3.73 | 0    | 22    | 0.047  | 1    | U      | K.NFLSMLIK.L    |
| 68. | CLC1A_MOUSE Mass: 30938 Score: 21 Matches: 1(1) Sequences: 1(1) emPAI: 0.15<br>C-type lectin domain family 1 member A OS=Mus musculus GN=Clec1a PE=1 SV=1          |          |           |           |       |      |       |        |      |        |                 |
|     | 897                                                                                                                                                                | 569.8289 | 1137.6432 | 1137.6506 | -6.54 | 1    | 21    | 0.036  | 1    | U      | R.IAGRVVPGELQ.- |
| 69. | LSG1_MOUSE Mass: 73111 Score: 21 Matches: 1(1) Sequences: 1(1) emPAI: 0.06<br>Large subunit GTPase 1 homolog OS=Mus musculus GN=Lsg1 PE=1 SV=2                     |          |           |           |       |      |       |        |      |        |                 |
|     | 225                                                                                                                                                                | 427.2425 | 852.4705  | 852.4678  | 3.22  | 2    | 21    | 0.033  | 1    | U      | K.KHGNNRNK.K    |
| 70. | RT18A_MOUSE Mass: 22307 Score: 21 Matches: 1(1) Sequences: 1(1) emPAI: 0.21<br>28S ribosomal protein S18a, mitochondrial OS=Mus musculus GN=Mrps18a PE=2 SV=1      |          |           |           |       |      |       |        |      |        |                 |
|     | 616                                                                                                                                                                | 517.7977 | 1033.5808 | 1033.5709 | 9.59  | 1    | 21    | 0.042  | 1    | U      | R.YLTRWAPK.S    |
| 71. | AR13B_MOUSE Mass: 48114 Score: 21 Matches: 1(1) Sequences: 1(1) emPAI: 0.09<br>ADP-ribosylation factor-like protein 13B OS=Mus musculus GN=Arl13b PE=1 SV=2        |          |           |           |       |      |       |        |      |        |                 |
|     | 191                                                                                                                                                                | 416.2706 | 830.5266  | 830.5225  | 4.90  | 2    | 21    | 0.024  | 1    | U      | K.KIDKSIK.K     |
| 72. | FAN_MOUSE Mass: 104479 Score: 21 Matches: 1(1) Sequences: 1(1) emPAI: 0.04<br>Protein FAN OS=Mus musculus GN=Nsmaf PE=1 SV=2                                       |          |           |           |       |      |       |        |      |        |                 |
|     | 2481                                                                                                                                                               | 718.9109 | 1435.8072 | 1435.7935 | 9.53  | 1    | 21    | 0.038  | 1    | U      | K.LQLHEQYKIHK.E |
| 73. | ATS16_MOUSE Mass: 136193 Score: 21 Matches: 2(2) Sequences: 1(1) emPAI: 0.03                                                                                       |          |           |           |       |      |       |        |      |        |                 |



|     |                                                                                                                                                                           |          |           |           |       |      |       |        |      |        |                   |
|-----|---------------------------------------------------------------------------------------------------------------------------------------------------------------------------|----------|-----------|-----------|-------|------|-------|--------|------|--------|-------------------|
|     | A disintegrin and metalloproteinase with thrombospondin motifs 16 OS=Mus musculus GN=Adamts16 PE=2 SV=2                                                                   |          |           |           |       |      |       |        |      |        |                   |
|     | Query                                                                                                                                                                     | Observed | Mr(expt)  | Mr(calc)  | ppm   | Miss | Score | Expect | Rank | Unique | Peptide           |
|     | 675                                                                                                                                                                       | 533.7094 | 1065.4043 | 1065.4033 | 0.90  | 0    | 20    | 0.018  | 1    | U      | K.DGTPCEDSR.N 676 |
| 74. | SSF1_MOUSE Mass: 52724 Score: 21 Matches: 1(1) Sequences: 1(1) emPAI: 0.09<br>Suppressor of SWI4 1 homolog OS=Mus musculus GN=Ppan PE=1 SV=2                              |          |           |           |       |      |       |        |      |        |                   |
|     | Query                                                                                                                                                                     | Observed | Mr(expt)  | Mr(calc)  | ppm   | Miss | Score | Expect | Rank | Unique | Peptide           |
|     | 247                                                                                                                                                                       | 431.7552 | 861.4959  | 861.4994  | -3.96 | 0    | 21    | 0.03   | 1    | U      | R.MTLQLIK.I       |
| 75. | NRAP_MOUSE Mass: 195633 Score: 20 Matches: 1(1) Sequences: 1(1) emPAI: 0.02<br>Nebulin-related-anchoring protein OS=Mus musculus GN=Nrap PE=1 SV=3                        |          |           |           |       |      |       |        |      |        |                   |
|     | Query                                                                                                                                                                     | Observed | Mr(expt)  | Mr(calc)  | ppm   | Miss | Score | Expect | Rank | Unique | Peptide           |
|     | 257                                                                                                                                                                       | 434.7663 | 867.5180  | 867.5112  | 7.84  | 1    | 20    | 0.027  | 1    | U      | R.RMLHALK.V       |
| 76. | ASH1L_MOUSE Mass: 331126 Score: 20 Matches: 1(1) Sequences: 1(1) emPAI: 0.01<br>Histone-lysine N-methyltransferase ASH1L OS=Mus musculus GN=Ash1l PE=1 SV=3               |          |           |           |       |      |       |        |      |        |                   |
|     | Query                                                                                                                                                                     | Observed | Mr(expt)  | Mr(calc)  | ppm   | Miss | Score | Expect | Rank | Unique | Peptide           |
|     | 1595                                                                                                                                                                      | 652.8823 | 1303.7500 | 1303.7500 | -0.00 | 1    | 20    | 0.045  | 1    | U      | K.IPASKVFSLQSK.E  |
| 77. | ATR_MOUSE Mass: 300030 Score: 20 Matches: 1(1) Sequences: 1(1) emPAI: 0.01<br>Serine/threonine-protein kinase ATR OS=Mus musculus GN=Atr PE=1 SV=2                        |          |           |           |       |      |       |        |      |        |                   |
|     | Query                                                                                                                                                                     | Observed | Mr(expt)  | Mr(calc)  | ppm   | Miss | Score | Expect | Rank | Unique | Peptide           |
|     | 280                                                                                                                                                                       | 441.7741 | 881.5337  | 881.5334  | 0.27  | 0    | 20    | 0.026  | 1    | U      | R.IHALTSLK.E      |
| 78. | TRRAP_MOUSE Mass: 291370 Score: 19 Matches: 2(2) Sequences: 2(2) emPAI: 0.03<br>Transformation/transcription domain-associated protein OS=Mus musculus GN=Trrap PE=1 SV=2 |          |           |           |       |      |       |        |      |        |                   |
|     | Query                                                                                                                                                                     | Observed | Mr(expt)  | Mr(calc)  | ppm   | Miss | Score | Expect | Rank | Unique | Peptide           |
|     | 79                                                                                                                                                                        | 379.7298 | 757.4451  | 757.4446  | 0.64  | 0    | 21    | 0.039  | 1    | U      | R.LATVQAR.G       |
|     | 196                                                                                                                                                                       | 417.6836 | 833.3526  | 833.3524  | 0.22  | 0    | 16    | 0.05   | 2    | U      | K.ACVDPACR.Y      |
| 79. | ANR22_MOUSE Mass: 21895 Score: 19 Matches: 1(1) Sequences: 1(1) emPAI: 0.22<br>Ankyrin repeat domain-containing protein 22 OS=Mus musculus GN=Ankrd22 PE=2 SV=1           |          |           |           |       |      |       |        |      |        |                   |
|     | Query                                                                                                                                                                     | Observed | Mr(expt)  | Mr(calc)  | ppm   | Miss | Score | Expect | Rank | Unique | Peptide           |
|     | 1603                                                                                                                                                                      | 654.3895 | 1306.7645 | 1306.7683 | -2.86 | 1    | 19    | 0.027  | 1    | U      | R.LKFSQIALMLK.R   |

|     |                                                                                                                                                                   |          |           |           |       |      |       |        |      |        |                        |
|-----|-------------------------------------------------------------------------------------------------------------------------------------------------------------------|----------|-----------|-----------|-------|------|-------|--------|------|--------|------------------------|
| 80. | MICA1_MOUSE Mass: 116711 Score: 19 Matches: 1(1) Sequences: 1(1) emPAI: 0.04<br>[F-actin]-methionine sulfoxide oxidase MICAL1 OS=Mus musculus GN=Mical1 PE=1 SV=1 |          |           |           |       |      |       |        |      |        |                        |
|     | Query                                                                                                                                                             | Observed | Mr(expt)  | Mr(calc)  | ppm   | Miss | Score | Expect | Rank | Unique | Peptide                |
|     | 5037                                                                                                                                                              | 850.4907 | 1698.9669 | 1698.9515 | 9.03  | 2    | 19    | 0.046  | 1    | U      | R.ELEAEGTKLELALRK.E    |
| 81. | K22E_MOUSE Mass: 70880 Score: 19 Matches: 1(1) Sequences: 1(1) emPAI: 0.06<br>Keratin, type II cytoskeletal 2 epidermal OS=Mus musculus GN=Krt2 PE=1 SV=1         |          |           |           |       |      |       |        |      |        |                        |
|     | Query                                                                                                                                                             | Observed | Mr(expt)  | Mr(calc)  | ppm   | Miss | Score | Expect | Rank | Unique | Peptide                |
|     | 2435                                                                                                                                                              | 715.8023 | 1429.5901 | 1429.5818 | 5.75  | 0    | 19    | 0.04   | 1    | U      | R.GSGSGSGGGGYSSGGGSR.G |
| 82. | S27A2_MOUSE Mass: 70378 Score: 19 Matches: 1(1) Sequences: 1(1) emPAI: 0.06<br>Very long-chain acyl-CoA synthetase OS=Mus musculus GN=Slc27a2 PE=1 SV=2           |          |           |           |       |      |       |        |      |        |                        |
|     | Query                                                                                                                                                             | Observed | Mr(expt)  | Mr(calc)  | ppm   | Miss | Score | Expect | Rank | Unique | Peptide                |
|     | 462                                                                                                                                                               | 480.7974 | 959.5802  | 959.5837  | -3.66 | 1    | 19    | 0.038  | 1    | U      | R.IGMASLKIK.E          |
| 83. | AKTIP_MOUSE Mass: 32921 Score: 18 Matches: 1(1) Sequences: 1(1) emPAI: 0.14<br>AKT-interacting protein OS=Mus musculus GN=Aktip PE=1 SV=1                         |          |           |           |       |      |       |        |      |        |                        |
|     | Query                                                                                                                                                             | Observed | Mr(expt)  | Mr(calc)  | ppm   | Miss | Score | Expect | Rank | Unique | Peptide                |
|     | 120                                                                                                                                                               | 391.7442 | 781.4738  | 781.4698  | 5.14  | 0    | 18    | 0.037  | 1    | U      | K.QLPSIPK.N            |
| 84. | NRIP1_MOUSE Mass: 126259 Score: 18 Matches: 1(1) Sequences: 1(1) emPAI: 0.03<br>Nuclear receptor-interacting protein 1 OS=Mus musculus GN=Nrip1 PE=1 SV=1         |          |           |           |       |      |       |        |      |        |                        |
|     | Query                                                                                                                                                             | Observed | Mr(expt)  | Mr(calc)  | ppm   | Miss | Score | Expect | Rank | Unique | Peptide                |
|     | 53                                                                                                                                                                | 371.2291 | 740.4437  | 740.4432  | 0.64  | 0    | 18    | 0.023  | 1    | U      | K.IPGVDIK.E            |
| 85. | CE042_MOUSE Mass: 358324 Score: 17 Matches: 1(1) Sequences: 1(1) emPAI: 0.01<br>Protein JBTS17 OS=Mus musculus GN=Jbts17 PE=1 SV=4                                |          |           |           |       |      |       |        |      |        |                        |
|     | Query                                                                                                                                                             | Observed | Mr(expt)  | Mr(calc)  | ppm   | Miss | Score | Expect | Rank | Unique | Peptide                |
|     | 8                                                                                                                                                                 | 353.2183 | 704.4221  | 704.4221  | 0.06  | 0    | 17    | 0.022  | 1    | U      | R.AGLFGLK.Q            |
| 86. | TENA_MOUSE Mass: 231659 Score: 15 Matches: 1(1) Sequences: 1(1) emPAI: 0.02<br>Tenascin OS=Mus musculus GN=Tnc PE=1 SV=1                                          |          |           |           |       |      |       |        |      |        |                        |
|     | Query                                                                                                                                                             | Observed | Mr(expt)  | Mr(calc)  | ppm   | Miss | Score | Expect | Rank | Unique | Peptide                |

|     |                                                                                                                                                              |          |           |           |       |      |       |        |      |        |                |
|-----|--------------------------------------------------------------------------------------------------------------------------------------------------------------|----------|-----------|-----------|-------|------|-------|--------|------|--------|----------------|
|     | 684                                                                                                                                                          | 535.2133 | 1068.4120 | 1068.4077 | 4.02  | 1    | 15    | 0.047  | 1    | U      | R.CPRDCSQR.G   |
| 87. | DDX1_MOUSE Mass: 82448 Score: 15 Matches: 1(1) Sequences: 1(1) emPAI: 0.05<br>ATP-dependent RNA helicase DDX1 OS=Mus musculus GN=Ddx1 PE=1 SV=1              |          |           |           |       |      |       |        |      |        |                |
|     | Query                                                                                                                                                        | Observed | Mr(expt)  | Mr(calc)  | ppm   | Miss | Score | Expect | Rank | Unique | Peptide        |
|     | 110                                                                                                                                                          | 388.2575 | 774.5005  | 774.4963  | 5.35  | 2    | 15    | 0.028  | 1    | U      | K.KGKTTIK.T    |
| 88. | ETAA1_MOUSE Mass: 96492 Score: 15 Matches: 2(2) Sequences: 2(2) emPAI: 0.09<br>Ewing's tumor-associated antigen 1 homolog OS=Mus musculus GN=Etaa1 PE=2 SV=1 |          |           |           |       |      |       |        |      |        |                |
|     | Query                                                                                                                                                        | Observed | Mr(expt)  | Mr(calc)  | ppm   | Miss | Score | Expect | Rank | Unique | Peptide        |
|     | 64                                                                                                                                                           | 373.1829 | 744.3513  | 744.3515  | -0.23 | 0    | 13    | 0.046  | 1    | U      | R.QAAADGGR.S   |
|     | 70                                                                                                                                                           | 375.7127 | 749.4109  | 749.4105  | 0.52  | 1    | 17    | 0.047  | 2    | U      | K.ASCTKLK.T    |
| 89. | MUC19_MOUSE Mass: 693090 Score: 15 Matches: 1(1) Sequences: 1(1) emPAI: 0.01<br>Mucin-19 OS=Mus musculus GN=Muc19 PE=2 SV=2                                  |          |           |           |       |      |       |        |      |        |                |
|     | Query                                                                                                                                                        | Observed | Mr(expt)  | Mr(calc)  | ppm   | Miss | Score | Expect | Rank | Unique | Peptide        |
|     | 1013                                                                                                                                                         | 590.7309 | 1179.4472 | 1179.4359 | 9.65  | 0    | 15    | 0.044  | 1    | U      | R.GCYCPVGMVR.N |
| 90. | DOCK3_MOUSE Mass: 232760 Score: 15 Matches: 1(1) Sequences: 1(1) emPAI: 0.02<br>Dedicator of cytokinesis protein 3 OS=Mus musculus GN=Dock3 PE=1 SV=1        |          |           |           |       |      |       |        |      |        |                |
|     | Query                                                                                                                                                        | Observed | Mr(expt)  | Mr(calc)  | ppm   | Miss | Score | Expect | Rank | Unique | Peptide        |
|     | 183                                                                                                                                                          | 412.2554 | 822.4963  | 822.4963  | -0.02 | 0    | 15    | 0.039  | 1    | U      | K.LPIPIDR.F    |
| 91. | FBXL8_MOUSE Mass: 41119 Score: 15 Matches: 1(1) Sequences: 1(1) emPAI: 0.11<br>F-box/LRR-repeat protein 8 OS=Mus musculus GN=Fbxl8 PE=1 SV=1                 |          |           |           |       |      |       |        |      |        |                |
|     | Query                                                                                                                                                        | Observed | Mr(expt)  | Mr(calc)  | ppm   | Miss | Score | Expect | Rank | Unique | Peptide        |
|     | 251                                                                                                                                                          | 432.6706 | 863.3266  | 863.3266  | 0.02  | 0    | 15    | 0.035  | 1    | U      | R.CACPEDAR.A   |
| 92. | ACATN_MOUSE Mass: 61036 Score: 14 Matches: 1(1) Sequences: 1(1) emPAI: 0.07<br>Acetyl-coenzyme A transporter 1 OS=Mus musculus GN=Slc33a1 PE=1 SV=1          |          |           |           |       |      |       |        |      |        |                |
|     | Query                                                                                                                                                        | Observed | Mr(expt)  | Mr(calc)  | ppm   | Miss | Score | Expect | Rank | Unique | Peptide        |
|     | 195                                                                                                                                                          | 417.2782 | 832.5418  | 832.5422  | -0.43 | 0    | 14    | 0.035  | 1    | U      | K.LLFSIIK.M    |
| 93. | STAB1_MOUSE Mass: 276074 Score: 14 Matches: 1(1) Sequences: 1(1) emPAI: 0.02                                                                                 |          |           |           |       |      |       |        |      |        |                |



| Biotin-TPL pulldown Band #2 |                                                                                                  |           |           |       |      |       |          |      |        |                                                                                                                                                                                                                                                                                                                                                                                                                                                                                                                                                                                                                                                                                                                      |  |
|-----------------------------|--------------------------------------------------------------------------------------------------|-----------|-----------|-------|------|-------|----------|------|--------|----------------------------------------------------------------------------------------------------------------------------------------------------------------------------------------------------------------------------------------------------------------------------------------------------------------------------------------------------------------------------------------------------------------------------------------------------------------------------------------------------------------------------------------------------------------------------------------------------------------------------------------------------------------------------------------------------------------------|--|
| 1.                          | ERCC3_MOUSE Mass: 89070 Score: 15598 Matches: 319(319) Sequences: 5(5) emPAI: 0.47               |           |           |       |      |       |          |      |        |                                                                                                                                                                                                                                                                                                                                                                                                                                                                                                                                                                                                                                                                                                                      |  |
|                             | TFIIH basal transcription factor complex helicase XPB subunit OS=Mus musculus GN=Ercc3 PE=2 SV=1 |           |           |       |      |       |          |      |        |                                                                                                                                                                                                                                                                                                                                                                                                                                                                                                                                                                                                                                                                                                                      |  |
| Query                       | Observed                                                                                         | Mr(expt)  | Mr(calc)  | ppm   | Miss | Score | Expect   | Rank | Unique | Peptide                                                                                                                                                                                                                                                                                                                                                                                                                                                                                                                                                                                                                                                                                                              |  |
| 1341                        | 644.3686                                                                                         | 1286.7226 | 1286.7235 | -0.64 | 0    | 74    | 3.1e-007 | 1    | U      | K.TGVDPGIIQFIK.L 1334 1335<br>1340 1343 1344 1345 1346 135<br>3 1354 1358 1359 1360                                                                                                                                                                                                                                                                                                                                                                                                                                                                                                                                                                                                                                  |  |
| 1349                        | 429.9150                                                                                         | 1286.7231 | 1286.7235 | -0.26 | 0    | (63)  | 4.4e-006 | 1    | U      | K.TGVDPGIIQFIK.L 1348 1357                                                                                                                                                                                                                                                                                                                                                                                                                                                                                                                                                                                                                                                                                           |  |
| 3314                        | 777.8713                                                                                         | 1553.7280 | 1553.7283 | -0.18 | 0    | 127   | 2.3e-012 | 1    | U      | K.LAGMEEEEELAFSTK.E 3246<br>3247 3248 3249 3250 3251 325<br>2 3253 3254 3255 3256 3257 32<br>58 3259 3260 3261 3262 3263 3<br>264 3265 3266 3267 3268 3269<br>3270 3271 3273 3275 3276 327<br>7 3278 3281 3282 3283 3284 32<br>85 3286 3287 3288 3289 3290 3<br>291 3292 3293 3294 3296 3297<br>3298 3299 3300 3301 3302 330<br>3 3304 3305 3306 3307 3308 33<br>09 3310 3311 3312 3313 3315 3<br>316 3317 3318 3319 3320 3321<br>3322 3323 3324 3325 3326 332<br>7 3328 3329 3330 3331 3332 33<br>33 3334 3335 3336 3337 3338 3<br>339 3340 3341 3342 3343 3344<br>3345 3346 3347 3348 3349 335<br>0 3351 3354 3356 3357 3358 33<br>61 3362 3363 3364 3365 3366 3<br>367 3368 3369 3370 3371 3372<br>3374 3376 3377 |  |
| 3359                        | 518.9167                                                                                         | 1553.7284 | 1553.7283 | 0.09  | 0    | (78)  | 1.7e-007 | 1    | U      | K.LAGMEEEEELAFSTK.E 3373                                                                                                                                                                                                                                                                                                                                                                                                                                                                                                                                                                                                                                                                                             |  |

|  |      |          |           |           |       |   |       |          |   |   |                                                                                                                                                                                                                                                                                                                                                                                                                                                                                                                                                                                                                                                                                                                                                                                                                                              |
|--|------|----------|-----------|-----------|-------|---|-------|----------|---|---|----------------------------------------------------------------------------------------------------------------------------------------------------------------------------------------------------------------------------------------------------------------------------------------------------------------------------------------------------------------------------------------------------------------------------------------------------------------------------------------------------------------------------------------------------------------------------------------------------------------------------------------------------------------------------------------------------------------------------------------------------------------------------------------------------------------------------------------------|
|  | 3479 | 524.2481 | 1569.7223 | 1569.7232 | -0.56 | 0 | (69)  | 1.1e-006 | 1 | U | K.LAGMEEEEELAFSTK.E 3530<br>3564 3565 3585 3586 3587 362<br>2 3624 3625                                                                                                                                                                                                                                                                                                                                                                                                                                                                                                                                                                                                                                                                                                                                                                      |
|  | 3529 | 785.8687 | 1569.7227 | 1569.7232 | -0.29 | 0 | (115) | 3e-011   | 1 | U | K.LAGMEEEEELAFSTK.E 3465<br>3466 3467 3468 3469 3470 347<br>1 3472 3473 3474 3476 3477 34<br>78 3480 3482 3484 3485 3486 3<br>487 3488 3489 3490 3491 3492<br>3493 3494 3495 3496 3497 349<br>8 3499 3500 3501 3502 3503 35<br>05 3506 3507 3508 3509 3510 3<br>511 3512 3513 3515 3516 3517<br>3518 3519 3520 3521 3522 352<br>3 3524 3525 3526 3527 3528 35<br>31 3532 3533 3534 3536 3537 3<br>538 3539 3540 3541 3542 3543<br>3544 3545 3547 3548 3549 355<br>0 3551 3552 3553 3554 3555 35<br>56 3557 3558 3559 3560 3561 3<br>562 3563 3566 3567 3568 3569<br>3572 3573 3574 3575 3576 357<br>7 3578 3579 3580 3581 3582 35<br>83 3584 3588 3589 3590 3591 3<br>592 3593 3594 3595 3596 3597<br>3598 3599 3600 3601 3602 360<br>3 3604 3605 3606 3607 3608 36<br>09 3610 3611 3612 3614 3615 3<br>616 3618 3619 3620 3621 3623<br>3626 |
|  | 4073 | 816.9242 | 1631.8338 | 1631.8341 | -0.18 | 0 | 101   | 1.2e-009 | 1 | U | R.CLVLGNSAVSVEQWK.A 406<br>4 4066 4071 4072 4080 4087 40<br>89 4090                                                                                                                                                                                                                                                                                                                                                                                                                                                                                                                                                                                                                                                                                                                                                                          |

|    |                                                                                                                                                                  |          |           |           |       |      |       |          |      |        |                                                                                                                                                      |
|----|------------------------------------------------------------------------------------------------------------------------------------------------------------------|----------|-----------|-----------|-------|------|-------|----------|------|--------|------------------------------------------------------------------------------------------------------------------------------------------------------|
|    | 4078                                                                                                                                                             | 544.9520 | 1631.8341 | 1631.8341 | -0.02 | 0    | (57)  | 2.3e-005 | 1    | U      | R.CLVLGNSAVSVEQWK.A 405<br>8 4065 4074 4076 4077 4082                                                                                                |
|    | 4438                                                                                                                                                             | 840.9165 | 1679.8184 | 1679.8189 | -0.25 | 0    | (88)  | 2.3e-008 | 1    | U      | R.CLVLGNSAVSVEQWK.A 443<br>7                                                                                                                         |
|    | 4439                                                                                                                                                             | 560.9468 | 1679.8187 | 1679.8189 | -0.10 | 0    | (34)  | 0.0051   | 1    | U      | R.CLVLGNSAVSVEQWK.A                                                                                                                                  |
|    | 4655                                                                                                                                                             | 861.9440 | 1721.8734 | 1721.8737 | -0.16 | 0    | 75    | 3.9e-007 | 1    | U      | R.LNKPYIYGPTSQGER.M 465<br>4                                                                                                                         |
|    | 4663                                                                                                                                                             | 574.9655 | 1721.8745 | 1721.8737 | 0.50  | 0    | (60)  | 1.5e-005 | 1    | U      | R.LNKPYIYGPTSQGER.M 465<br>6 4658 4659 4660 4661                                                                                                     |
|    | 5102                                                                                                                                                             | 924.4386 | 1846.8626 | 1846.8633 | -0.38 | 0    | 44    | 0.00037  | 1    | U      | R.CICLEYPLLAEYDFR.N                                                                                                                                  |
|    | 5103                                                                                                                                                             | 616.6284 | 1846.8633 | 1846.8633 | -0.05 | 0    | (38)  | 0.0015   | 1    | U      | R.CICLEYPLLAEYDFR.N                                                                                                                                  |
|    | 5313                                                                                                                                                             | 972.4235 | 1942.8324 | 1942.8328 | -0.24 | 0    | (41)  | 0.00043  | 1    | U      | R.CICLEYPLLAEYDFR.N                                                                                                                                  |
| 2. | LIN41_MOUSE Mass: 91996 Score: 333 Matches: 27(27) Sequences: 2(2) emPAI: 0.10<br>E3 ubiquitin-protein ligase TRIM71 OS=Mus musculus GN=Trim71 PE=1 SV=1         |          |           |           |       |      |       |          |      |        |                                                                                                                                                      |
|    | Query                                                                                                                                                            | Observed | Mr(expt)  | Mr(calc)  | ppm   | Miss | Score | Expect   | Rank | Unique | Peptide                                                                                                                                              |
|    | 3697                                                                                                                                                             | 792.4448 | 1582.8750 | 1582.8759 | -0.60 | 0    | 68    | 1.1e-006 | 1    | U      | R.IQIFTFEGQFLK.F                                                                                                                                     |
|    | 4235                                                                                                                                                             | 825.8281 | 1649.6417 | 1649.6418 | -0.08 | 0    | (47)  | 3.3e-005 | 1    | U      | R.CLDCQEHLCDNCVR.A 4249                                                                                                                              |
|    | 4247                                                                                                                                                             | 550.8880 | 1649.6422 | 1649.6418 | 0.20  | 0    | 52    | 1.1e-005 | 1    | U      | R.CLDCQEHLCDNCVR.A 4225<br>4226 4227 4228 4229 4230 423<br>2 4234 4236 4237 4238 4241 42<br>45 4246 4251 4252 4253 4254 4<br>255 4256 4257 4258 4261 |
| 3. | ZFAN1_MOUSE Mass: 30183 Score: 103 Matches: 6(6) Sequences: 1(1) emPAI: 0.15<br>AN1-type zinc finger protein 1 OS=Mus musculus GN=Zfand1 PE=1 SV=1               |          |           |           |       |      |       |          |      |        |                                                                                                                                                      |
|    | Query                                                                                                                                                            | Observed | Mr(expt)  | Mr(calc)  | ppm   | Miss | Score | Expect   | Rank | Unique | Peptide                                                                                                                                              |
|    | 104                                                                                                                                                              | 409.7604 | 817.5063  | 817.5095  | -3.98 | 1    | 36    | 0.0008   | 1    | U      | K.VALMKLK.M 99 100 101 103<br>105                                                                                                                    |
| 4. | MT21A_MOUSE Mass: 24271 Score: 43 Matches: 3(3) Sequences: 1(1) emPAI: 0.19<br>Protein N-lysine methyltransferase METTL21A OS=Mus musculus GN=Mettl21A PE=2 SV=1 |          |           |           |       |      |       |          |      |        |                                                                                                                                                      |

|     | Query                                                                                                                                                       | Observed | Mr(expt)  | Mr(calc)  | ppm   | Miss | Score | Expect | Rank | Unique | Peptide             |
|-----|-------------------------------------------------------------------------------------------------------------------------------------------------------------|----------|-----------|-----------|-------|------|-------|--------|------|--------|---------------------|
|     | 108                                                                                                                                                         | 410.2524 | 818.4903  | 818.4902  | 0.12  | 0    | 30    | 0.0023 | 1    | U      | K.VALEFLK.S 106 107 |
| 5.  | STXB4_MOUSE Mass: 61650 Score: 34 Matches: 1(1) Sequences: 1(1) emPAI: 0.07<br>Syntaxin-binding protein 4 OS=Mus musculus GN=Stxbp4 PE=1 SV=1               |          |           |           |       |      |       |        |      |        |                     |
|     | 18                                                                                                                                                          | 359.2107 | 716.4069  | 716.4068  | 0.06  | 0    | 34    | 0.0012 | 1    | U      | K.ETGLGLK.I         |
| 6.  | COHA1_MOUSE Mass: 147884 Score: 32 Matches: 1(1) Sequences: 1(1) emPAI: 0.03<br>Collagen alpha-1(XVII) chain OS=Mus musculus GN=Col17a1 PE=1 SV=3           |          |           |           |       |      |       |        |      |        |                     |
|     | 2929                                                                                                                                                        | 755.8824 | 1509.7503 | 1509.7418 | 5.64  | 1    | 32    | 0.0069 | 1    | U      | K.EMELLIMTKDSGK.V   |
| 7.  | UNC80_MOUSE Mass: 363275 Score: 30 Matches: 1(1) Sequences: 1(1) emPAI: 0.01<br>Protein unc-80 homolog OS=Mus musculus GN=Unc80 PE=1 SV=2                   |          |           |           |       |      |       |        |      |        |                     |
|     | 170                                                                                                                                                         | 438.2711 | 874.5277  | 874.5276  | 0.13  | 0    | 30    | 0.0028 | 1    | U      | R.QLVQFIK.E         |
| 8.  | ANPRB_MOUSE Mass: 116986 Score: 29 Matches: 1(1) Sequences: 1(1) emPAI: 0.04<br>Atrial natriuretic peptide receptor 2 OS=Mus musculus GN=Npr2 PE=1 SV=2     |          |           |           |       |      |       |        |      |        |                     |
|     | 173                                                                                                                                                         | 438.7632 | 875.5118  | 875.5116  | 0.19  | 0    | 29    | 0.0053 | 1    | U      | R.QVLFELK.H         |
| 9.  | CDHR1_MOUSE Mass: 93969 Score: 28 Matches: 1(1) Sequences: 1(1) emPAI: 0.05<br>Cadherin-related family member 1 OS=Mus musculus GN=Cdhr1 PE=1 SV=1          |          |           |           |       |      |       |        |      |        |                     |
|     | 182                                                                                                                                                         | 444.2710 | 886.5275  | 886.5276  | -0.12 | 0    | 28    | 0.017  | 1    | U      | R.APALPPPK.M        |
| 10. | GRIP1_MOUSE Mass: 121982 Score: 28 Matches: 1(1) Sequences: 1(1) emPAI: 0.04<br>Glutamate receptor-interacting protein 1 OS=Mus musculus GN=Grip1 PE=1 SV=1 |          |           |           |       |      |       |        |      |        |                     |
|     | 4307                                                                                                                                                        | 553.6132 | 1657.8177 | 1657.8028 | 8.94  | 2    | 28    | 0.02   | 1    | U      | R.SLYSTSPRGTMRR.R   |
| 11. | FMNL1_MOUSE Mass: 121983 Score: 28 Matches: 1(1) Sequences: 1(1) emPAI: 0.04                                                                                |          |           |           |       |      |       |        |      |        |                     |



|     |                                                                                                                   |          |           |           |       |      |       |        |      |        |                   |
|-----|-------------------------------------------------------------------------------------------------------------------|----------|-----------|-----------|-------|------|-------|--------|------|--------|-------------------|
|     | Formin-like protein 1 OS=Mus musculus GN=Fmn1 PE=1 SV=1                                                           |          |           |           |       |      |       |        |      |        |                   |
|     | Query                                                                                                             | Observed | Mr(expt)  | Mr(calc)  | ppm   | Miss | Score | Expect | Rank | Unique | Peptide           |
|     | 1252                                                                                                              | 637.8225 | 1273.6303 | 1273.6302 | 0.09  | 1    | 28    | 0.017  | 1    | U      | K.KAEQEVEQWK.K    |
| 12. | 1A1L2_MOUSE Mass: 66086 Score: 27 Matches: 1(1) Sequences: 1(1) emPAI: 0.07                                       |          |           |           |       |      |       |        |      |        |                   |
|     | Probable inactive 1-aminocyclopropane-1-carboxylate synthase-like protein 2 OS=Mus musculus GN=Accs1 PE=2 SV=1    |          |           |           |       |      |       |        |      |        |                   |
|     | Query                                                                                                             | Observed | Mr(expt)  | Mr(calc)  | ppm   | Miss | Score | Expect | Rank | Unique | Peptide           |
|     | 495                                                                                                               | 519.7846 | 1037.5547 | 1037.5579 | -3.15 | 1    | 27    | 0.014  | 1    | U      | K.FVQEKMLK.F      |
| 13. | PLCD_MOUSE Mass: 43781 Score: 26 Matches: 1(1) Sequences: 1(1) emPAI: 0.10                                        |          |           |           |       |      |       |        |      |        |                   |
|     | 1-acyl-sn-glycerol-3-phosphate acyltransferase delta OS=Mus musculus GN=Agpat4 PE=1 SV=1                          |          |           |           |       |      |       |        |      |        |                   |
|     | Query                                                                                                             | Observed | Mr(expt)  | Mr(calc)  | ppm   | Miss | Score | Expect | Rank | Unique | Peptide           |
|     | 85                                                                                                                | 401.2471 | 800.4796  | 800.4756  | 5.07  | 0    | 26    | 0.029  | 1    | U      | R.LGILGNSK.V      |
| 14. | PCAT2_MOUSE Mass: 60215 Score: 26 Matches: 1(1) Sequences: 1(1) emPAI: 0.07                                       |          |           |           |       |      |       |        |      |        |                   |
|     | Lysophosphatidylcholine acyltransferase 2 OS=Mus musculus GN=Lpcat2 PE=1 SV=1                                     |          |           |           |       |      |       |        |      |        |                   |
|     | Query                                                                                                             | Observed | Mr(expt)  | Mr(calc)  | ppm   | Miss | Score | Expect | Rank | Unique | Peptide           |
|     | 118                                                                                                               | 416.2319 | 830.4493  | 830.4498  | -0.54 | 0    | 26    | 0.031  | 1    | U      | K.NTINEIK.K       |
| 15. | P3C2A_MOUSE Mass: 190637 Score: 25 Matches: 1(1) Sequences: 1(1) emPAI: 0.02                                      |          |           |           |       |      |       |        |      |        |                   |
|     | Phosphatidylinositol 4-phosphate 3-kinase C2 domain-containing subunit alpha OS=Mus musculus GN=Pik3c2a PE=1 SV=2 |          |           |           |       |      |       |        |      |        |                   |
|     | Query                                                                                                             | Observed | Mr(expt)  | Mr(calc)  | ppm   | Miss | Score | Expect | Rank | Unique | Peptide           |
|     | 2711                                                                                                              | 738.3326 | 1474.6507 | 1474.6585 | -5.25 | 0    | 25    | 0.02   | 1    | U      | K.SCSFFSSNAMPLK.V |
| 16. | AN34C_MOUSE Mass: 58135 Score: 25 Matches: 1(1) Sequences: 1(1) emPAI: 0.08                                       |          |           |           |       |      |       |        |      |        |                   |
|     | Ankyrin repeat domain-containing protein 34C OS=Mus musculus GN=Ankrd34c PE=1 SV=1                                |          |           |           |       |      |       |        |      |        |                   |
|     | Query                                                                                                             | Observed | Mr(expt)  | Mr(calc)  | ppm   | Miss | Score | Expect | Rank | Unique | Peptide           |
|     | 484                                                                                                               | 517.2692 | 1032.5238 | 1032.5240 | -0.21 | 0    | 25    | 0.035  | 1    | U      | K.VSASTPASWK.A    |
| 17. | KDM5D_MOUSE Mass: 176904 Score: 25 Matches: 1(1) Sequences: 1(1) emPAI: 0.02                                      |          |           |           |       |      |       |        |      |        |                   |
|     | Lysine-specific demethylase 5D OS=Mus musculus GN=Kdm5d PE=2 SV=2                                                 |          |           |           |       |      |       |        |      |        |                   |
|     | Query                                                                                                             | Observed | Mr(expt)  | Mr(calc)  | ppm   | Miss | Score | Expect | Rank | Unique | Peptide           |
|     | 187                                                                                                               | 445.2791 | 888.5436  | 888.5466  | -3.42 | 1    | 25    | 0.009  | 1    | U      | K.KLLVMGTK.V      |

|     |                                                                                                     |          |           |           |       |      |       |        |      |        |                  |
|-----|-----------------------------------------------------------------------------------------------------|----------|-----------|-----------|-------|------|-------|--------|------|--------|------------------|
| 18. | DHX36_MOUSE Mass: 113812 Score: 25 Matches: 1(1) Sequences: 1(1) emPAI: 0.04                        |          |           |           |       |      |       |        |      |        |                  |
|     | ATP-dependent RNA helicase DHX36 OS=Mus musculus GN=Dhx36 PE=1 SV=2                                 |          |           |           |       |      |       |        |      |        |                  |
|     | Query                                                                                               | Observed | Mr(expt)  | Mr(calc)  | ppm   | Miss | Score | Expect | Rank | Unique | Peptide          |
|     | 325                                                                                                 | 470.2322 | 938.4499  | 938.4531  | -3.49 | 0    | 25    | 0.028  | 1    | U      | K.LPSYGMQK.E     |
| 19. | AMER2_MOUSE Mass: 69890 Score: 24 Matches: 1(1) Sequences: 1(1) emPAI: 0.06                         |          |           |           |       |      |       |        |      |        |                  |
|     | APC membrane recruitment protein 2 OS=Mus musculus GN=Amer2 PE=1 SV=2                               |          |           |           |       |      |       |        |      |        |                  |
|     | Query                                                                                               | Observed | Mr(expt)  | Mr(calc)  | ppm   | Miss | Score | Expect | Rank | Unique | Peptide          |
|     | 27                                                                                                  | 365.2105 | 728.4065  | 728.4069  | -0.46 | 0    | 24    | 0.008  | 1    | U      | K.TGDVPIK.T      |
| 20. | UBP24_MOUSE Mass: 293814 Score: 24 Matches: 1(1) Sequences: 1(1) emPAI: 0.01                        |          |           |           |       |      |       |        |      |        |                  |
|     | Ubiquitin carboxyl-terminal hydrolase 24 OS=Mus musculus GN=Usp24 PE=1 SV=1                         |          |           |           |       |      |       |        |      |        |                  |
|     | Query                                                                                               | Observed | Mr(expt)  | Mr(calc)  | ppm   | Miss | Score | Expect | Rank | Unique | Peptide          |
|     | 55                                                                                                  | 389.2106 | 776.4066  | 776.4028  | 4.91  | 0    | 24    | 0.019  | 1    | U      | R.QQSVSTK.D      |
| 21. | RYP2_MOUSE Mass: 564458 Score: 24 Matches: 1(1) Sequences: 1(1) emPAI: 0.01                         |          |           |           |       |      |       |        |      |        |                  |
|     | Ryanodine receptor 2 OS=Mus musculus GN=Ryr2 PE=1 SV=1                                              |          |           |           |       |      |       |        |      |        |                  |
|     | Query                                                                                               | Observed | Mr(expt)  | Mr(calc)  | ppm   | Miss | Score | Expect | Rank | Unique | Peptide          |
|     | 1483                                                                                                | 652.8276 | 1303.6407 | 1303.6408 | -0.07 | 1    | 24    | 0.041  | 1    | U      | K.SEGQVDVEKWK.F  |
| 22. | TRPM2_MOUSE Mass: 172092 Score: 23 Matches: 1(1) Sequences: 1(1) emPAI: 0.03                        |          |           |           |       |      |       |        |      |        |                  |
|     | Transient receptor potential cation channel subfamily M member 2 OS=Mus musculus GN=Trpm2 PE=1 SV=2 |          |           |           |       |      |       |        |      |        |                  |
|     | Query                                                                                               | Observed | Mr(expt)  | Mr(calc)  | ppm   | Miss | Score | Expect | Rank | Unique | Peptide          |
|     | 49                                                                                                  | 388.7004 | 775.3863  | 775.3864  | -0.15 | 0    | 23    | 0.028  | 1    | U      | R.VSEAWGK.T      |
| 23. | GVIN1_MOUSE Mass: 280637 Score: 23 Matches: 1(1) Sequences: 1(1) emPAI: 0.02                        |          |           |           |       |      |       |        |      |        |                  |
|     | Interferon-induced very large GTPase 1 OS=Mus musculus GN=Gvin1 PE=1 SV=1                           |          |           |           |       |      |       |        |      |        |                  |
|     | Query                                                                                               | Observed | Mr(expt)  | Mr(calc)  | ppm   | Miss | Score | Expect | Rank | Unique | Peptide          |
|     | 1869                                                                                                | 679.8872 | 1357.7599 | 1357.7605 | -0.50 | 1    | 23    | 0.04   | 1    | U      | K.GSLPDLWTKITK.Q |
| 24. | ADCYA_MOUSE Mass: 186290 Score: 23 Matches: 1(1) Sequences: 1(1) emPAI: 0.02                        |          |           |           |       |      |       |        |      |        |                  |
|     | Adenylate cyclase type 10 OS=Mus musculus GN=Adcy10 PE=2 SV=2                                       |          |           |           |       |      |       |        |      |        |                  |
|     | Query                                                                                               | Observed | Mr(expt)  | Mr(calc)  | ppm   | Miss | Score | Expect | Rank | Unique | Peptide          |
|     | 334                                                                                                 | 473.3101 | 944.6056  | 944.6059  | -0.25 | 0    | 23    | 0.0049 | 1    | U      | R.LSKPLFLK.S     |

|     |                                                                                                                                                                  |          |           |           |       |      |       |        |      |        |                 |  |
|-----|------------------------------------------------------------------------------------------------------------------------------------------------------------------|----------|-----------|-----------|-------|------|-------|--------|------|--------|-----------------|--|
| 25. | CDC26_MOUSE Mass: 9755 Score: 23 Matches: 1(1) Sequences: 1(1) emPAI: 0.52<br>Anaphase-promoting complex subunit CDC26 OS=Mus musculus GN=Cdc26 PE=1 SV=1        |          |           |           |       |      |       |        |      |        |                 |  |
|     | Query                                                                                                                                                            | Observed | Mr(expt)  | Mr(calc)  | ppm   | Miss | Score | Expect | Rank | Unique | Peptide         |  |
|     | 339                                                                                                                                                              | 473.7897 | 945.5648  | 945.5647  | 0.06  | 0    | 23    | 0.019  | 1    | U      | R.IGYKPQLK.S    |  |
| 26. | DJC21_MOUSE Mass: 61696 Score: 22 Matches: 1(1) Sequences: 1(1) emPAI: 0.07<br>DnaJ homolog subfamily C member 21 OS=Mus musculus GN=Dnajc21 PE=1 SV=1           |          |           |           |       |      |       |        |      |        |                 |  |
|     | Query                                                                                                                                                            | Observed | Mr(expt)  | Mr(calc)  | ppm   | Miss | Score | Expect | Rank | Unique | Peptide         |  |
|     | 2483                                                                                                                                                             | 721.3292 | 1440.6439 | 1440.6554 | -8.02 | 1    | 22    | 0.04   | 1    | U      | K.ELQEMEARYEK.E |  |
| 27. | SMRC1_MOUSE Mass: 122813 Score: 22 Matches: 1(1) Sequences: 1(1) emPAI: 0.04<br>SWI/SNF complex subunit SMARCC1 OS=Mus musculus GN=Smarcc1 PE=1 SV=2             |          |           |           |       |      |       |        |      |        |                 |  |
|     | Query                                                                                                                                                            | Observed | Mr(expt)  | Mr(calc)  | ppm   | Miss | Score | Expect | Rank | Unique | Peptide         |  |
|     | 48                                                                                                                                                               | 388.2575 | 774.5003  | 774.4963  | 5.22  | 2    | 22    | 0.0065 | 1    | U      | K.KTLAKSK.G     |  |
| 28. | PGFRB_MOUSE Mass: 122728 Score: 22 Matches: 1(1) Sequences: 1(1) emPAI: 0.04<br>Platelet-derived growth factor receptor beta OS=Mus musculus GN=Pdgfrb PE=1 SV=1 |          |           |           |       |      |       |        |      |        |                 |  |
|     | Query                                                                                                                                                            | Observed | Mr(expt)  | Mr(calc)  | ppm   | Miss | Score | Expect | Rank | Unique | Peptide         |  |
|     | 89                                                                                                                                                               | 402.7526 | 803.4907  | 803.4939  | -3.97 | 1    | 22    | 0.017  | 1    | U      | K.VAVKMLK.S     |  |
|     | CSF1R_MOUSE Mass: 109110 Score: 22 Matches: 1(1) Sequences: 1(1)<br>Macrophage colony-stimulating factor 1 receptor OS=Mus musculus GN=Csf1r PE=1 SV=3           |          |           |           |       |      |       |        |      |        |                 |  |
|     | FGFR1_MOUSE Mass: 91922 Score: 22 Matches: 1(1) Sequences: 1(1)<br>Fibroblast growth factor receptor 1 OS=Mus musculus GN=Fgfr1 PE=1 SV=2                        |          |           |           |       |      |       |        |      |        |                 |  |
|     | TYRO3_MOUSE Mass: 96147 Score: 22 Matches: 1(1) Sequences: 1(1)<br>Tyrosine-protein kinase receptor TYRO3 OS=Mus musculus GN=Tyro3 PE=1 SV=2                     |          |           |           |       |      |       |        |      |        |                 |  |
| 29. | SKOR1_MOUSE Mass: 100183 Score: 21 Matches: 1(1) Sequences: 1(1) emPAI: 0.04<br>SKI family transcriptional corepressor 1 OS=Mus musculus GN=Skor1 PE=1 SV=2      |          |           |           |       |      |       |        |      |        |                 |  |
|     | Query                                                                                                                                                            | Observed | Mr(expt)  | Mr(calc)  | ppm   | Miss | Score | Expect | Rank | Unique | Peptide         |  |
|     | 411                                                                                                                                                              | 498.7993 | 995.5841  | 995.5876  | -3.51 | 2    | 21    | 0.029  | 1    | U      | R.RHLKLSDK.S    |  |
| 30. | VISTA_MOUSE Mass: 33538 Score: 21 Matches: 1(1) Sequences: 1(1) emPAI: 0.13                                                                                      |          |           |           |       |      |       |        |      |        |                 |  |

|     |                                                                                                                                                        |          |           |           |       |      |       |        |      |        |                    |
|-----|--------------------------------------------------------------------------------------------------------------------------------------------------------|----------|-----------|-----------|-------|------|-------|--------|------|--------|--------------------|
|     | V-type immunoglobulin domain-containing suppressor of T-cell activation OS=Mus musculus GN=Vsir PE=1 SV=2                                              |          |           |           |       |      |       |        |      |        |                    |
|     | Query                                                                                                                                                  | Observed | Mr(expt)  | Mr(calc)  | ppm   | Miss | Score | Expect | Rank | Unique | Peptide            |
|     | 3                                                                                                                                                      | 353.2183 | 704.4221  | 704.4221  | 0.06  | 0    | 21    | 0.0088 | 1    | U      | R.GLVAAFV.V        |
| 31. | CADH1_MOUSE Mass: 98195 Score: 20 Matches: 2(2) Sequences: 1(1) emPAI: 0.04<br>Cadherin-1 OS=Mus musculus GN=Cdh1 PE=1 SV=1                            |          |           |           |       |      |       |        |      |        |                    |
|     | Query                                                                                                                                                  | Observed | Mr(expt)  | Mr(calc)  | ppm   | Miss | Score | Expect | Rank | Unique | Peptide            |
|     | 316                                                                                                                                                    | 466.3023 | 930.5901  | 930.5875  | 2.73  | 2    | 19    | 0.024  | 1    | U      | K.RHLKLHK.L 315    |
| 32. | NSE2_MOUSE Mass: 28213 Score: 20 Matches: 1(1) Sequences: 1(1) emPAI: 0.16<br>E3 SUMO-protein ligase NSE2 OS=Mus musculus GN=Nsmce2 PE=2 SV=1          |          |           |           |       |      |       |        |      |        |                    |
|     | Query                                                                                                                                                  | Observed | Mr(expt)  | Mr(calc)  | ppm   | Miss | Score | Expect | Rank | Unique | Peptide            |
|     | 81                                                                                                                                                     | 399.7106 | 797.4067  | 797.4031  | 4.48  | 0    | 20    | 0.033  | 1    | U      | R.AIESHNK.K        |
| 33. | GPX3_MOUSE Mass: 25409 Score: 20 Matches: 1(1) Sequences: 1(1) emPAI: 0.18<br>Glutathione peroxidase 3 OS=Mus musculus GN=Gpx3 PE=1 SV=2               |          |           |           |       |      |       |        |      |        |                    |
|     | Query                                                                                                                                                  | Observed | Mr(expt)  | Mr(calc)  | ppm   | Miss | Score | Expect | Rank | Unique | Peptide            |
|     | 16                                                                                                                                                     | 358.7081 | 715.4016  | 715.3977  | 5.58  | 0    | 20    | 0.021  | 1    | U      | R.QAALSAR.G        |
| 34. | P66A_MOUSE Mass: 67292 Score: 19 Matches: 2(2) Sequences: 1(1) emPAI: 0.07<br>Transcriptional repressor p66 alpha OS=Mus musculus GN=Gatad2a PE=1 SV=2 |          |           |           |       |      |       |        |      |        |                    |
|     | Query                                                                                                                                                  | Observed | Mr(expt)  | Mr(calc)  | ppm   | Miss | Score | Expect | Rank | Unique | Peptide            |
|     | 52                                                                                                                                                     | 388.7550 | 775.4955  | 775.4956  | -0.08 | 1    | 17    | 0.022  | 1    | U      | R.LKAAFVK.A 51     |
| 35. | RSPH9_MOUSE Mass: 31311 Score: 19 Matches: 1(1) Sequences: 1(1) emPAI: 0.14<br>Radial spoke head protein 9 homolog OS=Mus musculus GN=Rsph9 PE=1 SV=1  |          |           |           |       |      |       |        |      |        |                    |
|     | Query                                                                                                                                                  | Observed | Mr(expt)  | Mr(calc)  | ppm   | Miss | Score | Expect | Rank | Unique | Peptide            |
|     | 1164                                                                                                                                                   | 628.3923 | 1254.7700 | 1254.7812 | -8.94 | 1    | 19    | 0.038  | 1    | U      | K.AVAIIPRGALFK.T   |
| 36. | GFRA1_MOUSE Mass: 51718 Score: 18 Matches: 1(1) Sequences: 1(1) emPAI: 0.09<br>GDNF family receptor alpha-1 OS=Mus musculus GN=Gfra1 PE=2 SV=2         |          |           |           |       |      |       |        |      |        |                    |
|     | Query                                                                                                                                                  | Observed | Mr(expt)  | Mr(calc)  | ppm   | Miss | Score | Expect | Rank | Unique | Peptide            |
|     | 3983                                                                                                                                                   | 541.8855 | 1622.6347 | 1622.6400 | -3.26 | 1    | 18    | 0.032  | 1    | U      | K.ASDQCLKEQSCSTK.Y |

|     |                                                                              |          |          |          |       |      |       |        |      |        |              |
|-----|------------------------------------------------------------------------------|----------|----------|----------|-------|------|-------|--------|------|--------|--------------|
| 37. | TICRR_MOUSE Mass: 208205 Score: 17 Matches: 1(1) Sequences: 1(1) emPAI: 0.02 |          |          |          |       |      |       |        |      |        |              |
|     | Treslin OS=Mus musculus GN=Ticrr PE=1 SV=2                                   |          |          |          |       |      |       |        |      |        |              |
|     | Query                                                                        | Observed | Mr(expt) | Mr(calc) | ppm   | Miss | Score | Expect | Rank | Unique | Peptide      |
|     | 333                                                                          | 472.8180 | 943.6214 | 943.6178 | 3.77  | 2    | 17    | 0.018  | 1    | U      | R.ILRSSKLK.E |
| 38. | KALRN_MOUSE Mass: 336788 Score: 17 Matches: 1(1) Sequences: 1(1) emPAI: 0.01 |          |          |          |       |      |       |        |      |        |              |
|     | Kalirin OS=Mus musculus GN=Kalrn PE=1 SV=1                                   |          |          |          |       |      |       |        |      |        |              |
|     | Query                                                                        | Observed | Mr(expt) | Mr(calc) | ppm   | Miss | Score | Expect | Rank | Unique | Peptide      |
|     | 122                                                                          | 416.7682 | 831.5218 | 831.5218 | -0.04 | 0    | 17    | 0.026  | 1    | U      | R.LAQLFIK.H  |
| 39. | HELZ_MOUSE Mass: 219742 Score: 16 Matches: 1(1) Sequences: 1(1) emPAI: 0.02  |          |          |          |       |      |       |        |      |        |              |
|     | Probable helicase with zinc finger domain OS=Mus musculus GN=Helz PE=1 SV=2  |          |          |          |       |      |       |        |      |        |              |
|     | Query                                                                        | Observed | Mr(expt) | Mr(calc) | ppm   | Miss | Score | Expect | Rank | Unique | Peptide      |
|     | 220                                                                          | 460.2842 | 918.5539 | 918.5538 | 0.10  | 0    | 16    | 0.037  | 1    | U      | R.IASFLQLK.N |
| 40. | C16L2_MOUSE Mass: 18208 Score: 13 Matches: 1(1) Sequences: 1(1) emPAI: 0.26  |          |          |          |       |      |       |        |      |        |              |
|     | CD164 sialomucin-like 2 protein OS=Mus musculus GN=Cd164l2 PE=2 SV=1         |          |          |          |       |      |       |        |      |        |              |
|     | Query                                                                        | Observed | Mr(expt) | Mr(calc) | ppm   | Miss | Score | Expect | Rank | Unique | Peptide      |
|     | 2                                                                            | 350.1823 | 698.3499 | 698.3534 | -4.89 | 0    | 13    | 0.048  | 1    | U      | -.MAAPGPR.A  |

**Biotin-TPL pulldown Band #3**

1. MEX3C\_MOUSE Mass: 68531 Score: 3644 Matches: 106(106) Sequences: 8(8) emPAI: 0.86

RNA-binding E3 ubiquitin-protein ligase MEX3C OS=Mus musculus GN=Mex3c PE=2 SV=2

| Query | Observed | Mr(expt)  | Mr(calc)  | ppm   | Miss | Score | Expect   | Rank | Unique | Peptide                                                                                                  |
|-------|----------|-----------|-----------|-------|------|-------|----------|------|--------|----------------------------------------------------------------------------------------------------------|
| 1121  | 549.2827 | 1096.5509 | 1096.5513 | -0.37 | 0    | 71    | 6.5e-007 | 1    | U      | R.ATGLAPEEPGR.L 1118 1119<br>1120 1122 1123 1124 1125 1126<br>1127 1128 1129 1130                        |
| 1651  | 602.3219 | 1202.6292 | 1202.6295 | -0.25 | 0    | 91    | 9.9e-009 | 1    | U      | R.GEEPIFVVTGR.K 1648 1649<br>1650 1652 1653 1654 1655 1656<br>1657 1658 1660 1662 1663 1666<br>1667 1668 |
| 1664  | 401.8839 | 1202.6300 | 1202.6295 | 0.37  | 0    | (46)  | 0.00036  | 1    | U      | R.GEEPIFVVTGR.K 1659 1661<br>1665                                                                        |
| 2420  | 672.3459 | 1342.6772 | 1342.6775 | -0.22 | 0    | 99    | 1.3e-009 | 1    | U      | R.AAAVAAAAAAQCQAR.R 241<br>9 2422 2423 2424 2425 2427                                                    |
| 2428  | 448.5669 | 1342.6788 | 1342.6775 | 0.98  | 0    | (90)  | 1.1e-008 | 1    | U      | R.AAAVAAAAAAQCQAR.R 241<br>8 2421 2426                                                                   |
| 3392  | 500.6002 | 1498.7787 | 1498.7786 | 0.08  | 1    | 76    | 2.3e-007 | 1    | U      | R.AAAVAAAAAAQCQARR.A                                                                                     |
| 3393  | 750.3967 | 1498.7788 | 1498.7786 | 0.11  | 1    | (42)  | 0.00069  | 1    | U      | R.AAAVAAAAAAQCQARR.A                                                                                     |
| 3420  | 752.3845 | 1502.7545 | 1502.7551 | -0.42 | 0    | 94    | 5.8e-009 | 1    | U      | R.EILSAAEHFSMIR.A 3417 343<br>4 3437 3438 3442 3443 3455 346<br>1                                        |
| 3422  | 501.9255 | 1502.7545 | 1502.7551 | -0.39 | 0    | (43)  | 0.00062  | 1    | U      | R.EILSAAEHFSMIR.A 3416 342<br>7 3433 3436 3440 3441 3446 345<br>1 3454 3458                              |
| 3566  | 760.3820 | 1518.7495 | 1518.7500 | -0.36 | 0    | (89)  | 1.7e-008 | 1    | U      | R.EILSAAEHFSMIR.A 3571                                                                                   |
| 3574  | 507.2573 | 1518.7502 | 1518.7500 | 0.13  | 0    | (32)  | 0.0086   | 1    | U      | R.EILSAAEHFSMIR.A 3568 357<br>6                                                                          |
| 4309  | 836.4440 | 1670.8734 | 1670.8740 | -0.38 | 0    | 86    | 2.8e-008 | 1    |        | R.IQQQTHTYIVTPSR.D 4311 43<br>12                                                                         |
| 4315  | 557.9657 | 1670.8753 | 1670.8740 | 0.75  | 0    | (55)  | 3.1e-005 | 1    |        | R.IQQQTHTYIVTPSR.D 4308 43<br>10 4313 4314                                                               |
| 4398  | 565.3014 | 1692.8823 | 1692.8835 | -0.68 | 0    | (38)  | 0.0019   | 1    | U      | R.LSPTFPESIEHPLAR.R 4400 4<br>404 4406 4417 4420                                                         |
| 4409  | 847.4491 | 1692.8836 | 1692.8835 | 0.09  | 0    | 72    | 6.5e-007 | 1    | U      | R.LSPTFPESIEHPLAR.R 4402 4<br>410 4415                                                                   |

|    |                                                                                 |          |           |           |       |      |       |          |      |        |                                                                           |
|----|---------------------------------------------------------------------------------|----------|-----------|-----------|-------|------|-------|----------|------|--------|---------------------------------------------------------------------------|
|    | 4537                                                                            | 573.6067 | 1717.7982 | 1717.7981 | 0.06  | 0    | (59)  | 1.2e-005 | 1    |        | K.EPVFEVTGMPENVDR.A 4531<br>4536 4541                                     |
|    | 4540                                                                            | 859.9065 | 1717.7984 | 1717.7981 | 0.17  | 0    | (71)  | 9.1e-007 | 1    |        | K.EPVFEVTGMPENVDR.A 4529<br>4530 4534 4538 4542                           |
|    | 4628                                                                            | 578.9381 | 1733.7925 | 1733.7931 | -0.32 | 0    | (63)  | 5e-006   | 1    |        | K.EPVFEVTGMPENVDR.A 4632                                                  |
|    | 4630                                                                            | 867.9036 | 1733.7927 | 1733.7931 | -0.20 | 0    | 92    | 6.7e-009 | 1    |        | K.EPVFEVTGMPENVDR.A 4624<br>4625 4627                                     |
| 2. | MEX3B_MOUSE Mass: 61743 Score: 1601 Matches: 50(50) Sequences: 4(4) emPAI: 0.51 |          |           |           |       |      |       |          |      |        |                                                                           |
|    | RNA-binding protein MEX3B OS=Mus musculus GN=Mex3b PE=2 SV=2                    |          |           |           |       |      |       |          |      |        |                                                                           |
|    | Query                                                                           | Observed | Mr(expt)  | Mr(calc)  | ppm   | Miss | Score | Expect   | Rank | Unique | Peptide                                                                   |
|    | 1564                                                                            | 595.3140 | 1188.6134 | 1188.6139 | -0.45 | 0    | 75    | 4.4e-007 | 1    | U      | R.GEPPVFTGR.K                                                             |
|    | 3420                                                                            | 752.3845 | 1502.7545 | 1502.7551 | -0.42 | 0    | 94    | 5.8e-009 | 1    | U      | R.EIISAAEHFSMIR.A 3417 3434<br>3437 3438 3442 3443 3455 3461              |
|    | 3422                                                                            | 501.9255 | 1502.7545 | 1502.7551 | -0.39 | 0    | (43)  | 0.00062  | 1    | U      | R.EIISAAEHFSMIR.A 3416 3427<br>3433 3436 3440 3441 3446 3451<br>3454 3458 |
|    | 3566                                                                            | 760.3820 | 1518.7495 | 1518.7500 | -0.36 | 0    | (89)  | 1.7e-008 | 1    | U      | R.EIISAAEHFSMIR.A 3571                                                    |
|    | 3574                                                                            | 507.2573 | 1518.7502 | 1518.7500 | 0.13  | 0    | (32)  | 0.0086   | 1    | U      | R.EIISAAEHFSMIR.A 3568 3576                                               |
|    | 4309                                                                            | 836.4440 | 1670.8734 | 1670.8740 | -0.38 | 0    | 86    | 2.8e-008 | 1    |        | R.IQQQTHTYIVTPSR.D 4311 43<br>12                                          |
|    | 4315                                                                            | 557.9657 | 1670.8753 | 1670.8740 | 0.75  | 0    | (55)  | 3.1e-005 | 1    |        | R.IQQQTHTYIVTPSR.D 4308 43<br>10 4313 4314                                |
|    | 4537                                                                            | 573.6067 | 1717.7982 | 1717.7981 | 0.06  | 0    | (59)  | 1.2e-005 | 1    |        | K.EPVFEVTGMPENVDR.A 4531<br>4536 4541                                     |
|    | 4540                                                                            | 859.9065 | 1717.7984 | 1717.7981 | 0.17  | 0    | (71)  | 9.1e-007 | 1    |        | K.EPVFEVTGMPENVDR.A 4529<br>4530 4534 4538 4542                           |
|    | 4628                                                                            | 578.9381 | 1733.7925 | 1733.7931 | -0.32 | 0    | (63)  | 5e-006   | 1    |        | K.EPVFEVTGMPENVDR.A 4632                                                  |
|    | 4630                                                                            | 867.9036 | 1733.7927 | 1733.7931 | -0.20 | 0    | 92    | 6.7e-009 | 1    |        | K.EPVFEVTGMPENVDR.A 4624<br>4625 4627                                     |
| 3. | ERCC3_MOUSE Mass: 89070 Score: 104 Matches: 2(2) Sequences: 1(1) emPAI: 0.05    |          |           |           |       |      |       |          |      |        |                                                                           |

|    |                                                                                                                                                                                       |          |           |           |       |      |       |          |      |        |                                  |  |
|----|---------------------------------------------------------------------------------------------------------------------------------------------------------------------------------------|----------|-----------|-----------|-------|------|-------|----------|------|--------|----------------------------------|--|
|    | TFIIH basal transcription factor complex helicase XPB subunit OS=Mus musculus GN=Ercc3 PE=2 SV=1                                                                                      |          |           |           |       |      |       |          |      |        |                                  |  |
|    | Query                                                                                                                                                                                 | Observed | Mr(expt)  | Mr(calc)  | ppm   | Miss | Score | Expect   | Rank | Unique | Peptide                          |  |
|    | 4123                                                                                                                                                                                  | 544.9515 | 1631.8326 | 1631.8341 | -0.93 | 0    | (39)  | 0.0019   | 1    | U      | R.CLVLGNSAVSVEQWK.A              |  |
|    | 4124                                                                                                                                                                                  | 816.9241 | 1631.8336 | 1631.8341 | -0.33 | 0    | 82    | 7.6e-008 | 1    | U      | R.CLVLGNSAVSVEQWK.A              |  |
| 4. | DCTP1_MOUSE Mass: 18783 Score: 84 Matches: 4(4) Sequences: 1(1) emPAI: 0.25<br>dCTP pyrophosphatase 1 OS=Mus musculus GN=Dctpp1 PE=1 SV=1                                             |          |           |           |       |      |       |          |      |        |                                  |  |
|    | Query                                                                                                                                                                                 | Observed | Mr(expt)  | Mr(calc)  | ppm   | Miss | Score | Expect   | Rank | Unique | Peptide                          |  |
|    | 2856                                                                                                                                                                                  | 705.3380 | 1408.6615 | 1408.6623 | -0.58 | 0    | 43    | 0.00055  | 1    | U      | K.SDTEPGPQAWPPK.E 2857 2858 2859 |  |
| 5. | ROCK1_MOUSE Mass: 158072 Score: 52 Matches: 1(1) Sequences: 1(1) emPAI: 0.03<br>Rho-associated protein kinase 1 OS=Mus musculus GN=Rock1 PE=1 SV=1                                    |          |           |           |       |      |       |          |      |        |                                  |  |
|    | Query                                                                                                                                                                                 | Observed | Mr(expt)  | Mr(calc)  | ppm   | Miss | Score | Expect   | Rank | Unique | Peptide                          |  |
|    | 4964                                                                                                                                                                                  | 907.4464 | 1812.8781 | 1812.8781 | 0.01  | 0    | 52    | 9e-005   | 1    | U      | R.GILEEQYFELTQESK.K              |  |
| 6. | PTCD3_MOUSE Mass: 77747 Score: 48 Matches: 1(1) Sequences: 1(1) emPAI: 0.06<br>Pentatricopeptide repeat domain-containing protein 3, mitochondrial OS=Mus musculus GN=Ptcd3 PE=1 SV=2 |          |           |           |       |      |       |          |      |        |                                  |  |
|    | Query                                                                                                                                                                                 | Observed | Mr(expt)  | Mr(calc)  | ppm   | Miss | Score | Expect   | Rank | Unique | Peptide                          |  |
|    | 5                                                                                                                                                                                     | 350.7087 | 699.4028  | 699.4027  | 0.10  | 0    | 48    | 1.7e-005 | 1    | U      | M.AAAVAAR.R                      |  |
| 7. | LIN41_MOUSE Mass: 91996 Score: 47 Matches: 3(3) Sequences: 1(1) emPAI: 0.05<br>E3 ubiquitin-protein ligase TRIM71 OS=Mus musculus GN=Trim71 PE=1 SV=1                                 |          |           |           |       |      |       |          |      |        |                                  |  |
|    | Query                                                                                                                                                                                 | Observed | Mr(expt)  | Mr(calc)  | ppm   | Miss | Score | Expect   | Rank | Unique | Peptide                          |  |
|    | 4213                                                                                                                                                                                  | 550.8880 | 1649.6422 | 1649.6418 | 0.20  | 0    | 42    | 8.7e-005 | 1    | U      | R.CLDCQEHLCDNCVR.A 4212 4214     |  |
| 8. | TMM70_MOUSE Mass: 28256 Score: 33 Matches: 1(1) Sequences: 1(1) emPAI: 0.16<br>Transmembrane protein 70, mitochondrial OS=Mus musculus GN=Tmem70 PE=2 SV=2                            |          |           |           |       |      |       |          |      |        |                                  |  |
|    | Query                                                                                                                                                                                 | Observed | Mr(expt)  | Mr(calc)  | ppm   | Miss | Score | Expect   | Rank | Unique | Peptide                          |  |
|    | 559                                                                                                                                                                                   | 472.2458 | 942.4770  | 942.4770  | 0.01  | 0    | 33    | 0.0029   | 1    | U      | R.AASLAEPER.L                    |  |
| 9. | MARCO_MOUSE Mass: 52697 Score: 30 Matches: 1(1) Sequences: 1(1) emPAI: 0.08<br>Macrophage receptor MARCO OS=Mus musculus GN=Marco PE=1 SV=1                                           |          |           |           |       |      |       |          |      |        |                                  |  |



|     | Query                                                                                                                                                                    | Observed | Mr(expt)  | Mr(calc)  | ppm   | Miss | Score | Expect | Rank | Unique | Peptide          |
|-----|--------------------------------------------------------------------------------------------------------------------------------------------------------------------------|----------|-----------|-----------|-------|------|-------|--------|------|--------|------------------|
|     | 823                                                                                                                                                                      | 514.2826 | 1026.5506 | 1026.5458 | 4.68  | 0    | 30    | 0.0048 | 1    | U      | K.GESGVPGLVGR.K  |
| 10. | PTN6_MOUSE Mass: 67517 Score: 29 Matches: 1(1) Sequences: 1(1) emPAI: 0.07<br>Tyrosine-protein phosphatase non-receptor type 6 OS=Mus musculus GN=Ptpn6 PE=1 SV=2        |          |           |           |       |      |       |        |      |        |                  |
|     | Query                                                                                                                                                                    | Observed | Mr(expt)  | Mr(calc)  | ppm   | Miss | Score | Expect | Rank | Unique | Peptide          |
|     | 232                                                                                                                                                                      | 418.2373 | 834.4601  | 834.4633  | -3.84 | 0    | 29    | 0.0086 | 1    | U      | R.VIVMTTR.E      |
| 11. | SULF2_MOUSE Mass: 100433 Score: 29 Matches: 1(1) Sequences: 1(1) emPAI: 0.04<br>Extracellular sulfatase Sulf-2 OS=Mus musculus GN=Sulf2 PE=2 SV=2                        |          |           |           |       |      |       |        |      |        |                  |
|     | Query                                                                                                                                                                    | Observed | Mr(expt)  | Mr(calc)  | ppm   | Miss | Score | Expect | Rank | Unique | Peptide          |
|     | 278                                                                                                                                                                      | 431.2323 | 860.4500  | 860.4538  | -4.44 | 1    | 29    | 0.015  | 1    | U      | R.VKDLCQR.A      |
| 12. | PZRN3_MOUSE Mass: 119326 Score: 27 Matches: 1(1) Sequences: 1(1) emPAI: 0.04<br>E3 ubiquitin-protein ligase PDZRN3 OS=Mus musculus GN=Pdzrn3 PE=1 SV=3                   |          |           |           |       |      |       |        |      |        |                  |
|     | Query                                                                                                                                                                    | Observed | Mr(expt)  | Mr(calc)  | ppm   | Miss | Score | Expect | Rank | Unique | Peptide          |
|     | 1160                                                                                                                                                                     | 553.7306 | 1105.4467 | 1105.4505 | -3.42 | 1    | 27    | 0.0041 | 1    | U      | K.CAHAARGCGR.V   |
| 13. | ANR27_MOUSE Mass: 116735 Score: 27 Matches: 1(1) Sequences: 1(1) emPAI: 0.04<br>Ankyrin repeat domain-containing protein 27 OS=Mus musculus GN=Ankrd27 PE=1 SV=2         |          |           |           |       |      |       |        |      |        |                  |
|     | Query                                                                                                                                                                    | Observed | Mr(expt)  | Mr(calc)  | ppm   | Miss | Score | Expect | Rank | Unique | Peptide          |
|     | 185                                                                                                                                                                      | 407.7243 | 813.4341  | 813.4345  | -0.44 | 0    | 27    | 0.0075 | 1    | U      | R.SVPDLAGR.S     |
| 14. | KC1A_MOUSE Mass: 38890 Score: 27 Matches: 1(1) Sequences: 1(1) emPAI: 0.12<br>Casein kinase I isoform alpha OS=Mus musculus GN=Csnk1a1 PE=1 SV=2                         |          |           |           |       |      |       |        |      |        |                  |
|     | Query                                                                                                                                                                    | Observed | Mr(expt)  | Mr(calc)  | ppm   | Miss | Score | Expect | Rank | Unique | Peptide          |
|     | 2861                                                                                                                                                                     | 705.3566 | 1408.6987 | 1408.7054 | -4.76 | 0    | 27    | 0.021  | 1    | U      | K.TVLMLADQMISR.I |
| 15. | MSD3_MOUSE Mass: 32303 Score: 26 Matches: 1(1) Sequences: 1(1) emPAI: 0.14<br>Myb/SANT-like DNA-binding domain-containing protein 3 OS=Mus musculus GN=Msantd3 PE=1 SV=1 |          |           |           |       |      |       |        |      |        |                  |
|     | Query                                                                                                                                                                    | Observed | Mr(expt)  | Mr(calc)  | ppm   | Miss | Score | Expect | Rank | Unique | Peptide          |
|     | 929                                                                                                                                                                      | 528.7934 | 1055.5722 | 1055.5658 | 6.11  | 2    | 26    | 0.016  | 1    | U      | K.KIMAHERR.E     |
| 16. | LRCC1_MOUSE Mass: 119094 Score: 26 Matches: 1(1) Sequences: 1(1) emPAI: 0.04                                                                                             |          |           |           |       |      |       |        |      |        |                  |

|     |                                                                                                                                                                        |          |           |           |       |      |       |        |      |        |                   |  |
|-----|------------------------------------------------------------------------------------------------------------------------------------------------------------------------|----------|-----------|-----------|-------|------|-------|--------|------|--------|-------------------|--|
|     | Leucine-rich repeat and coiled-coil domain-containing protein 1 OS=Mus musculus GN=Lrrcc1 PE=2 SV=2                                                                    |          |           |           |       |      |       |        |      |        |                   |  |
|     | Query                                                                                                                                                                  | Observed | Mr(expt)  | Mr(calc)  | ppm   | Miss | Score | Expect | Rank | Unique | Peptide           |  |
|     | 303                                                                                                                                                                    | 439.7401 | 877.4657  | 877.4657  | -0.02 | 1    | 26    | 0.025  | 1    | U      | K.DAIFKER.H       |  |
| 17. | PTTG1_MOUSE Mass: 21711 Score: 25 Matches: 1(1) Sequences: 1(1) emPAI: 0.21<br>Securin OS=Mus musculus GN=Pttg1 PE=1 SV=1                                              |          |           |           |       |      |       |        |      |        |                   |  |
|     | Query                                                                                                                                                                  | Observed | Mr(expt)  | Mr(calc)  | ppm   | Miss | Score | Expect | Rank | Unique | Peptide           |  |
|     | 159                                                                                                                                                                    | 400.7350 | 799.4554  | 799.4552  | 0.29  | 0    | 25    | 0.02   | 1    | U      | K.LQVSTPR.V       |  |
| 18. | SUH_MOUSE Mass: 58500 Score: 24 Matches: 1(1) Sequences: 1(1) emPAI: 0.08<br>Recombining binding protein suppressor of hairless OS=Mus musculus GN=Rbpj PE=1 SV=1      |          |           |           |       |      |       |        |      |        |                   |  |
|     | Query                                                                                                                                                                  | Observed | Mr(expt)  | Mr(calc)  | ppm   | Miss | Score | Expect | Rank | Unique | Peptide           |  |
|     | 2888                                                                                                                                                                   | 707.3594 | 1412.7043 | 1412.7161 | -8.31 | 1    | 24    | 0.04   | 1    | U      | M.PSGFPQSPRTSPR.A |  |
| 19. | SBNO2_MOUSE Mass: 149200 Score: 24 Matches: 1(1) Sequences: 1(1) emPAI: 0.03<br>Protein strawberry notch homolog 2 OS=Mus musculus GN=Sbno2 PE=1 SV=1                  |          |           |           |       |      |       |        |      |        |                   |  |
|     | Query                                                                                                                                                                  | Observed | Mr(expt)  | Mr(calc)  | ppm   | Miss | Score | Expect | Rank | Unique | Peptide           |  |
|     | 379                                                                                                                                                                    | 452.7297 | 903.4449  | 903.4450  | -0.15 | 0    | 24    | 0.036  | 1    | U      | K.WEEALTR.S       |  |
| 20. | AHDC1_MOUSE Mass: 167976 Score: 24 Matches: 1(1) Sequences: 1(1) emPAI: 0.03<br>AT-hook DNA-binding motif-containing protein 1 OS=Mus musculus GN=Ahdc1 PE=1 SV=1      |          |           |           |       |      |       |        |      |        |                   |  |
|     | Query                                                                                                                                                                  | Observed | Mr(expt)  | Mr(calc)  | ppm   | Miss | Score | Expect | Rank | Unique | Peptide           |  |
|     | 54                                                                                                                                                                     | 371.2344 | 740.4543  | 740.4545  | -0.19 | 0    | 24    | 0.0056 | 1    | U      | K.IPVSLGR.R       |  |
| 21. | KCJ10_MOUSE Mass: 42405 Score: 24 Matches: 1(1) Sequences: 1(1) emPAI: 0.11<br>ATP-sensitive inward rectifier potassium channel 10 OS=Mus musculus GN=Kcnj10 PE=1 SV=1 |          |           |           |       |      |       |        |      |        |                   |  |
|     | Query                                                                                                                                                                  | Observed | Mr(expt)  | Mr(calc)  | ppm   | Miss | Score | Expect | Rank | Unique | Peptide           |  |
|     | 1808                                                                                                                                                                   | 616.3378 | 1230.6611 | 1230.6568 | 3.50  | 1    | 24    | 0.048  | 1    | U      | K.EGSALSVRISNV.-  |  |
| 22. | MYO7B_MOUSE Mass: 240705 Score: 24 Matches: 1(1) Sequences: 1(1) emPAI: 0.02<br>Unconventional myosin-VIIb OS=Mus musculus GN=Myo7b PE=1 SV=3                          |          |           |           |       |      |       |        |      |        |                   |  |
|     | Query                                                                                                                                                                  | Observed | Mr(expt)  | Mr(calc)  | ppm   | Miss | Score | Expect | Rank | Unique | Peptide           |  |
|     | 64                                                                                                                                                                     | 374.1820 | 746.3495  | 746.3567  | -9.72 | 0    | 24    | 0.0099 | 1    | U      | R.AAMPMAR.S       |  |

|     |                                                                               |              |           |               |                 |             |       |        |      |        |               |  |
|-----|-------------------------------------------------------------------------------|--------------|-----------|---------------|-----------------|-------------|-------|--------|------|--------|---------------|--|
| 23. | LDB1_MOUSE                                                                    | Mass: 46472  | Score: 23 | Matches: 1(1) | Sequences: 1(1) | emPAI: 0.10 |       |        |      |        |               |  |
|     | LIM domain-binding protein 1 OS=Mus musculus GN=Ldb1 PE=1 SV=2                |              |           |               |                 |             |       |        |      |        |               |  |
|     | Query                                                                         | Observed     | Mr(expt)  | Mr(calc)      | ppm             | Miss        | Score | Expect | Rank | Unique | Peptide       |  |
|     | 203                                                                           | 412.2190     | 822.4235  | 822.4236      | -0.08           | 0           | 23    | 0.027  | 1    | U      | K.TYSLSPR.D   |  |
| 24. | SPTB2_MOUSE                                                                   | Mass: 274052 | Score: 23 | Matches: 1(1) | Sequences: 1(1) | emPAI: 0.02 |       |        |      |        |               |  |
|     | Spectrin beta chain, non-erythrocytic 1 OS=Mus musculus GN=Sptbn1 PE=1 SV=2   |              |           |               |                 |             |       |        |      |        |               |  |
|     | Query                                                                         | Observed     | Mr(expt)  | Mr(calc)      | ppm             | Miss        | Score | Expect | Rank | Unique | Peptide       |  |
|     | 574                                                                           | 473.7712     | 945.5279  | 945.5317      | -4.00           | 1           | 23    | 0.05   | 1    | U      | K.MKALAVEGK.R |  |
| 25. | DISP1_MOUSE                                                                   | Mass: 170019 | Score: 23 | Matches: 1(1) | Sequences: 1(1) | emPAI: 0.03 |       |        |      |        |               |  |
|     | Protein dispatched homolog 1 OS=Mus musculus GN=Disp1 PE=1 SV=2               |              |           |               |                 |             |       |        |      |        |               |  |
|     | Query                                                                         | Observed     | Mr(expt)  | Mr(calc)      | ppm             | Miss        | Score | Expect | Rank | Unique | Peptide       |  |
|     | 874                                                                           | 520.7722     | 1039.5298 | 1039.5338     | -3.89           | 0           | 23    | 0.038  | 1    | U      | K.ATLANYPYK.Y |  |
| 26. | FHOD1_MOUSE                                                                   | Mass: 129520 | Score: 23 | Matches: 1(1) | Sequences: 1(1) | emPAI: 0.03 |       |        |      |        |               |  |
|     | FH1/FH2 domain-containing protein 1 OS=Mus musculus GN=Fhod1 PE=1 SV=3        |              |           |               |                 |             |       |        |      |        |               |  |
|     | Query                                                                         | Observed     | Mr(expt)  | Mr(calc)      | ppm             | Miss        | Score | Expect | Rank | Unique | Peptide       |  |
|     | 439                                                                           | 461.7590     | 921.5034  | 921.5032      | 0.22            | 0           | 23    | 0.036  | 1    | U      | K.HELSPALR.A  |  |
| 27. | ADCY7_MOUSE                                                                   | Mass: 122628 | Score: 22 | Matches: 1(1) | Sequences: 1(1) | emPAI: 0.04 |       |        |      |        |               |  |
|     | Adenylate cyclase type 7 OS=Mus musculus GN=Adcy7 PE=2 SV=2                   |              |           |               |                 |             |       |        |      |        |               |  |
|     | Query                                                                         | Observed     | Mr(expt)  | Mr(calc)      | ppm             | Miss        | Score | Expect | Rank | Unique | Peptide       |  |
|     | 103                                                                           | 387.7089     | 773.4032  | 773.4032      | 0.02            | 1           | 22    | 0.038  | 1    | U      | R.LKEGGDR.H   |  |
| 28. | PUF60_MOUSE                                                                   | Mass: 60211  | Score: 20 | Matches: 1(1) | Sequences: 1(1) | emPAI: 0.07 |       |        |      |        |               |  |
|     | Poly(U)-binding-splicing factor PUF60 OS=Mus musculus GN=Puf60 PE=1 SV=2      |              |           |               |                 |             |       |        |      |        |               |  |
|     | Query                                                                         | Observed     | Mr(expt)  | Mr(calc)      | ppm             | Miss        | Score | Expect | Rank | Unique | Peptide       |  |
|     | 245                                                                           | 421.7458     | 841.4770  | 841.4770      | 0.06            | 0           | 20    | 0.042  | 1    | U      | K.AIQALNGR.W  |  |
| 29. | CE030_MOUSE                                                                   | Mass: 23116  | Score: 20 | Matches: 1(1) | Sequences: 1(1) | emPAI: 0.20 |       |        |      |        |               |  |
|     | UNC119-binding protein C5orf30 homolog OS=Mus musculus GN=D1Ert622e PE=2 SV=1 |              |           |               |                 |             |       |        |      |        |               |  |
|     | Query                                                                         | Observed     | Mr(expt)  | Mr(calc)      | ppm             | Miss        | Score | Expect | Rank | Unique | Peptide       |  |
|     | 248                                                                           | 422.7172     | 843.4198  | 843.4272      | -8.87           | 0           | 20    | 0.048  | 1    | U      | K.GEAMPALR.A  |  |

|     |                                                                                                                                                                       |          |           |           |       |      |       |        |      |        |               |
|-----|-----------------------------------------------------------------------------------------------------------------------------------------------------------------------|----------|-----------|-----------|-------|------|-------|--------|------|--------|---------------|
| 30. | PTPRM_MOUSE Mass: 163549 Score: 20 Matches: 1(1) Sequences: 1(1) emPAI: 0.03<br>Receptor-type tyrosine-protein phosphatase mu OS=Mus musculus GN=Ptpm PE=1 SV=2       |          |           |           |       |      |       |        |      |        |               |
|     | Query                                                                                                                                                                 | Observed | Mr(expt)  | Mr(calc)  | ppm   | Miss | Score | Expect | Rank | Unique | Peptide       |
|     | 793                                                                                                                                                                   | 509.7347 | 1017.4549 | 1017.4484 | 6.41  | 1    | 20    | 0.041  | 1    | U      | K.CADPMRGPR.K |
| 31. | PTHR_MOUSE Mass: 20088 Score: 18 Matches: 1(1) Sequences: 1(1) emPAI: 0.23<br>Parathyroid hormone-related protein OS=Mus musculus GN=Pthlh PE=2 SV=1                  |          |           |           |       |      |       |        |      |        |               |
|     | Query                                                                                                                                                                 | Observed | Mr(expt)  | Mr(calc)  | ppm   | Miss | Score | Expect | Rank | Unique | Peptide       |
|     | 19                                                                                                                                                                    | 359.1982 | 716.3817  | 716.3817  | 0.07  | 0    | 18    | 0.04   | 1    | U      | R.SVEGLGR.R   |
| 32. | CDPF1_MOUSE Mass: 13292 Score: 18 Matches: 1(1) Sequences: 1(1) emPAI: 0.37<br>Cysteine-rich DPF motif domain-containing protein 1 OS=Mus musculus GN=Cdpf1 PE=3 SV=2 |          |           |           |       |      |       |        |      |        |               |
|     | Query                                                                                                                                                                 | Observed | Mr(expt)  | Mr(calc)  | ppm   | Miss | Score | Expect | Rank | Unique | Peptide       |
|     | 145                                                                                                                                                                   | 396.2422 | 790.4698  | 790.4701  | -0.37 | 0    | 18    | 0.044  | 1    | U      | R.FLVLGSR.C   |
| 33. | KPYR_MOUSE Mass: 62270 Score: 17 Matches: 1(1) Sequences: 1(1) emPAI: 0.07<br>Pyruvate kinase PKLR OS=Mus musculus GN=Pklr PE=1 SV=1                                  |          |           |           |       |      |       |        |      |        |               |
|     | Query                                                                                                                                                                 | Observed | Mr(expt)  | Mr(calc)  | ppm   | Miss | Score | Expect | Rank | Unique | Peptide       |
|     | 69                                                                                                                                                                    | 374.6905 | 747.3665  | 747.3697  | -4.35 | 0    | 17    | 0.038  | 1    | U      | K.AGMNIAR.L   |
| 34. | BRD7_MOUSE Mass: 73954 Score: 17 Matches: 1(1) Sequences: 1(1) emPAI: 0.06<br>Bromodomain-containing protein 7 OS=Mus musculus GN=Brd7 PE=1 SV=1                      |          |           |           |       |      |       |        |      |        |               |
|     | Query                                                                                                                                                                 | Observed | Mr(expt)  | Mr(calc)  | ppm   | Miss | Score | Expect | Rank | Unique | Peptide       |
|     | 72                                                                                                                                                                    | 376.1921 | 750.3697  | 750.3694  | 0.40  | 0    | 17    | 0.045  | 1    | U      | R.LGMITTGR.L  |

| Biotin-TPL pulldown Band #4 |                                                                                     |           |           |       |      |       |          |      |        |                                                                                                                                               |  |
|-----------------------------|-------------------------------------------------------------------------------------|-----------|-----------|-------|------|-------|----------|------|--------|-----------------------------------------------------------------------------------------------------------------------------------------------|--|
| 1.                          | TRI63_MOUSE Mass: 39465 Score: 8683 Matches: 222(222) Sequences: 10(10) emPAI: 5.22 |           |           |       |      |       |          |      |        |                                                                                                                                               |  |
|                             | E3 ubiquitin-protein ligase TRIM63 OS=Mus musculus GN=Trim63 PE=1 SV=1              |           |           |       |      |       |          |      |        |                                                                                                                                               |  |
| Query                       | Observed                                                                            | Mr(expt)  | Mr(calc)  | ppm   | Miss | Score | Expect   | Rank | Unique | Peptide                                                                                                                                       |  |
| 347                         | 447.7085                                                                            | 893.4024  | 893.4025  | -0.09 | 0    | 73    | 2.9e-007 | 1    | U      | R.GGSVSMMSGGR.F 342 343 344 345 346 348 349                                                                                                   |  |
| 392                         | 455.7059                                                                            | 909.3973  | 909.3974  | -0.15 | 0    | (62)  | 2.8e-006 | 1    | U      | R.GGSVSMMSGGR.F 385 389 390 391 393                                                                                                           |  |
| 1533                        | 588.2955                                                                            | 1174.5765 | 1174.5764 | 0.07  | 0    | 49    | 0.00016  | 1    | U      | K.QECSSRPLQK.G 1532 1534                                                                                                                      |  |
| 2506                        | 664.3422                                                                            | 1326.6699 | 1326.6707 | -0.62 | 0    | 93    | 6.3e-009 | 1    | U      | K.FDTLYAILDEK.K 2498 2501 2503 2504 2508 2509 2510 2511 2512 2513 2514 2515 2516 2518 2520                                                    |  |
| 2517                        | 443.2307                                                                            | 1326.6704 | 1326.6707 | -0.24 | 0    | (26)  | 0.026    | 1    | U      | K.FDTLYAILDEK.K 2502 2505                                                                                                                     |  |
| 3225                        | 479.2817                                                                            | 1434.8233 | 1434.8235 | -0.11 | 0    | (51)  | 2.6e-005 | 1    | U      | K.LGFIEALILQYR.E 3209 3219 3224 3232 3233 3242                                                                                                |  |
| 3228                        | 718.4190                                                                            | 1434.8233 | 1434.8235 | -0.08 | 0    | 83    | 1.6e-008 | 1    | U      | K.LGFIEALILQYR.E 3207 3210 3211 3212 3215 3216 3217 3218 3221 3222 3223 3227 3229 3230 3231 3234 3235 3237 3238 3239 3240 3241 3243 3246 3248 |  |

|  |      |          |           |           |       |   |      |          |   |   |                                                                                                                                                                                                                                                                                                                                                                                                                                                                                                                                     |
|--|------|----------|-----------|-----------|-------|---|------|----------|---|---|-------------------------------------------------------------------------------------------------------------------------------------------------------------------------------------------------------------------------------------------------------------------------------------------------------------------------------------------------------------------------------------------------------------------------------------------------------------------------------------------------------------------------------------|
|  | 3313 | 723.9132 | 1445.8119 | 1445.8129 | -0.74 | 0 | 98   | 1.1e-009 | 1 | U | R.NLLVENIIDYK.Q 3304 3305 3306 3309 3311 3312 3314 3315 3316 3317 3320 3321 3322 3323 3325 3326 3327 3328 3329 3331 3332 3333 3334 3335 3336 3337 3339 3340 3341 3342 3343 3344 3345 3346 3347 3348 3349 3350 3351 3352 3354 3355 3356 3357 3358 3359 3360 3361 3362 3363 3364 3365 3367 3368 3369 3370 3371 3372 3373 3374 3375 3376 3377 3378 3379 3380 3381 3382 3383 3384 3385 3386 3387 3389 3390 3391 3392 3393 3394 3395 3396 3397 3398 3399 3400 3401 3403 3404 3405 3406 3407 3409 3410 3411 3413 3414 3415 3416 3417 3418 |
|  | 3338 | 482.9447 | 1445.8123 | 1445.8129 | -0.46 | 0 | (56) | 1.6e-005 | 1 | U | R.NLLVENIIDYK.Q 3308 3318 3324 3353                                                                                                                                                                                                                                                                                                                                                                                                                                                                                                 |
|  | 3464 | 728.3895 | 1454.7644 | 1454.7657 | -0.88 | 1 | 74   | 3.5e-007 | 1 | U | K.FDTLYAILDEKK.S                                                                                                                                                                                                                                                                                                                                                                                                                                                                                                                    |
|  | 3465 | 485.9287 | 1454.7644 | 1454.7657 | -0.88 | 1 | (53) | 4.8e-005 | 1 | U | K.FDTLYAILDEKK.S 3467 3468                                                                                                                                                                                                                                                                                                                                                                                                                                                                                                          |
|  | 3531 | 731.3898 | 1460.7650 | 1460.7657 | -0.50 | 0 | 94   | 5.4e-009 | 1 | U | R.VQTIISQLVDSCR.V 3528 3529 3530 3532 3533 3534                                                                                                                                                                                                                                                                                                                                                                                                                                                                                     |
|  | 3535 | 487.9293 | 1460.7660 | 1460.7657 | 0.22  | 0 | (38) | 0.0017   | 1 | U | R.VQTIISQLVDSCR.V                                                                                                                                                                                                                                                                                                                                                                                                                                                                                                                   |
|  | 3878 | 755.3820 | 1508.7495 | 1508.7505 | -0.64 | 0 | (72) | 8.2e-007 | 1 | U | R.VQTIISQLVDSCR.V                                                                                                                                                                                                                                                                                                                                                                                                                                                                                                                   |
|  | 4268 | 529.9275 | 1586.7606 | 1586.7610 | -0.22 | 0 | (43) | 0.00056  | 1 | U | K.SGLIPDGNAMENLEK.Q 4267                                                                                                                                                                                                                                                                                                                                                                                                                                                                                                            |
|  | 4271 | 794.3878 | 1586.7610 | 1586.7610 | -0.01 | 0 | 98   | 1.6e-009 | 1 | U | K.SGLIPDGNAMENLEK.Q 4266 4272 4273 4274 4275 4276                                                                                                                                                                                                                                                                                                                                                                                                                                                                                   |
|  | 4339 | 802.3854 | 1602.7563 | 1602.7559 | 0.26  | 0 | (83) | 5.8e-008 | 1 | U | K.SGLIPDGNAMENLEK.Q 4335 4337 4338 4341                                                                                                                                                                                                                                                                                                                                                                                                                                                                                             |
|  | 4342 | 535.2595 | 1602.7567 | 1602.7559 | 0.52  | 0 | (39) | 0.0013   | 1 | U | K.SGLIPDGNAMENLEK.Q                                                                                                                                                                                                                                                                                                                                                                                                                                                                                                                 |

|    |                                                                                            |          |           |           |       |      |       |          |      |        |                                         |
|----|--------------------------------------------------------------------------------------------|----------|-----------|-----------|-------|------|-------|----------|------|--------|-----------------------------------------|
|    | 4702                                                                                       | 861.9108 | 1721.8071 | 1721.8076 | -0.30 | 0    | 114   | 4.8e-011 | 1    | U      | K.TELSNCISMLVAGNDR.V 470<br>1 4707      |
|    | 4703                                                                                       | 574.9430 | 1721.8071 | 1721.8076 | -0.28 | 0    | (61)  | 9.7e-006 | 1    | U      | K.TELSNCISMLVAGNDR.V 470<br>4           |
|    | 4738                                                                                       | 869.9077 | 1737.8009 | 1737.8026 | -0.97 | 0    | (59)  | 1.7e-005 | 1    | U      | K.TELSNCISMLVAGNDR.V                    |
|    | 4739                                                                                       | 580.2744 | 1737.8012 | 1737.8026 | -0.76 | 0    | (38)  | 0.002    | 1    | U      | K.TELSNCISMLVAGNDR.V                    |
|    | 4777                                                                                       | 885.9026 | 1769.7907 | 1769.7924 | -0.92 | 0    | (25)  | 0.024    | 1    | U      | K.TELSNCISMLVAGNDR.V                    |
|    | 4778                                                                                       | 590.9379 | 1769.7920 | 1769.7924 | -0.23 | 0    | (29)  | 0.011    | 1    | U      | K.TELSNCISMLVAGNDR.V                    |
|    | 4807                                                                                       | 893.9003 | 1785.7861 | 1785.7873 | -0.66 | 0    | (43)  | 0.00042  | 1    | U      | K.TELSNCISMLVAGNDR.V                    |
|    | 4966                                                                                       | 628.6208 | 1882.8405 | 1882.8420 | -0.80 | 0    | (48)  | 0.00013  | 1    | U      | K.CANDIFQAANPYWTNR.G 49<br>71 4972 4973 |
|    | 4970                                                                                       | 942.4277 | 1882.8408 | 1882.8420 | -0.67 | 0    | 92    | 4.7e-009 | 1    | U      | K.CANDIFQAANPYWTNR.G 49<br>67 4974 4976 |
|    | 5057                                                                                       | 966.4207 | 1930.8269 | 1930.8268 | 0.05  | 0    | (36)  | 0.0014   | 1    | U      | K.CANDIFQAANPYWTNR.G                    |
| 2. | UB2G1_MOUSE Mass: 19497 Score: 415 Matches: 14(14) Sequences: 6(6) emPAI: 3.50             |          |           |           |       |      |       |          |      |        |                                         |
|    | Ubiquitin-conjugating enzyme E2 G1 OS=Mus musculus GN=Ube2g1 PE=1 SV=3                     |          |           |           |       |      |       |          |      |        |                                         |
|    | Query                                                                                      | Observed | Mr(expt)  | Mr(calc)  | ppm   | Miss | Score | Expect   | Rank | Unique | Peptide                                 |
|    | 691                                                                                        | 493.2770 | 984.5394  | 984.5392  | 0.16  | 0    | 28    | 0.0093   | 1    | U      | K.DYPLRPPK.M 689 690 694                |
|    | 1360                                                                                       | 572.3403 | 1142.6660 | 1142.6659 | 0.08  | 0    | 55    | 2.7e-005 | 1    | U      | M.TELQSALLLR.R                          |
|    | 1503                                                                                       | 585.7752 | 1169.5359 | 1169.5353 | 0.52  | 0    | 46    | 0.00018  | 1    | U      | K.YGYEKPEER.W                           |
|    | 2134                                                                                       | 425.5757 | 1273.7054 | 1273.7064 | -0.77 | 0    | (38)  | 0.0013   | 1    | U      | -.MTELQSALLLR.R                         |
|    | 2135                                                                                       | 637.8601 | 1273.7055 | 1273.7064 | -0.65 | 0    | 97    | 1.8e-009 | 1    | U      | -.MTELQSALLLR.R 2133                    |
|    | 2258                                                                                       | 645.8577 | 1289.7009 | 1289.7013 | -0.30 | 0    | (82)  | 6.2e-008 | 1    | U      | -.MTELQSALLLR.R 2259                    |
|    | 3806                                                                                       | 749.8880 | 1497.7614 | 1497.7616 | -0.11 | 0    | 49    | 0.00012  | 1    | U      | K.FITEIWHPNVDK.N                        |
|    | 3808                                                                                       | 500.2612 | 1497.7619 | 1497.7616 | 0.17  | 0    | (29)  | 0.014    | 1    | U      | K.FITEIWHPNVDK.N                        |
|    | 4715                                                                                       | 575.9418 | 1724.8037 | 1724.8039 | -0.16 | 0    | 42    | 0.00065  | 1    | U      | K.NGDVCISILHEPGEDK.Y                    |
| 3. | P85A_MOUSE Mass: 83465 Score: 156 Matches: 6(6) Sequences: 4(4) emPAI: 0.23                |          |           |           |       |      |       |          |      |        |                                         |
|    | Phosphatidylinositol 3-kinase regulatory subunit alpha OS=Mus musculus GN=Pik3r1 PE=1 SV=2 |          |           |           |       |      |       |          |      |        |                                         |
|    | Query                                                                                      | Observed | Mr(expt)  | Mr(calc)  | ppm   | Miss | Score | Expect   | Rank | Unique | Peptide                                 |
|    | 1938                                                                                       | 618.8269 | 1235.6392 | 1235.6397 | -0.40 | 0    | 69    | 1.2e-006 | 1    | U      | R.TAIEAFNETIK.I 1939 1940               |
|    | 3142                                                                                       | 476.6060 | 1426.7961 | 1426.7966 | -0.31 | 0    | 26    | 0.021    | 1    | U      | R.MNSIKPDLIQLR.K                        |
|    | 3605                                                                                       | 737.3535 | 1472.6925 | 1472.6936 | -0.76 | 0    | 29    | 0.01     | 1    | U      | R.GDFPGTYVEYIGR.K                       |
|    | 4204                                                                                       | 787.4136 | 1572.8127 | 1572.8147 | -1.27 | 0    | 40    | 0.0011   | 1    | U      | K.AIEILISTEWNER.Q                       |

|    |                                                                                                                    |          |           |           |       |      |       |          |      |        |                         |
|----|--------------------------------------------------------------------------------------------------------------------|----------|-----------|-----------|-------|------|-------|----------|------|--------|-------------------------|
| 4. | PK3CG_MOUSE Mass: 126319 Score: 102 Matches: 5(5) Sequences: 3(3) emPAI: 0.15                                      |          |           |           |       |      |       |          |      |        |                         |
|    | Phosphatidylinositol 4,5-bisphosphate 3-kinase catalytic subunit gamma isoform OS=Mus musculus GN=Pik3cg PE=1 SV=2 |          |           |           |       |      |       |          |      |        |                         |
|    | Query                                                                                                              | Observed | Mr(expt)  | Mr(calc)  | ppm   | Miss | Score | Expect   | Rank | Unique | Peptide                 |
|    | 421                                                                                                                | 459.7738 | 917.5331  | 917.5256  | 8.21  | 0    | 28    | 0.0098   | 1    | U      | K.IGMIEIVK.D            |
|    | 3037                                                                                                               | 471.5991 | 1411.7754 | 1411.7758 | -0.26 | 0    | 46    | 0.00019  | 1    | U      | K.IANNCIFIVIHR.G        |
|    | 4590                                                                                                               | 557.6085 | 1669.8036 | 1669.8035 | 0.03  | 0    | 42    | 0.00067  | 1    | U      | R.HGDYVLHMWQISGK.A 4589 |
|    | 4619                                                                                                               | 562.9401 | 1685.7985 | 1685.7984 | 0.07  | 0    | (25)  | 0.036    | 1    | U      | R.HGDYVLHMWQISGK.A      |
| 5. | RASH_MOUSE Mass: 21285 Score: 61 Matches: 1(1) Sequences: 1(1) emPAI: 0.22                                         |          |           |           |       |      |       |          |      |        |                         |
|    | GTPase HRas OS=Mus musculus GN=Hras PE=1 SV=2                                                                      |          |           |           |       |      |       |          |      |        |                         |
|    | Query                                                                                                              | Observed | Mr(expt)  | Mr(calc)  | ppm   | Miss | Score | Expect   | Rank | Unique | Peptide                 |
|    | 593                                                                                                                | 478.3003 | 954.5860  | 954.5862  | -0.23 | 0    | 61    | 2.1e-006 | 1    | U      | K.LVVVGAGGVGK.S         |
|    | RASK_MOUSE Mass: 21642 Score: 61 Matches: 1(1) Sequences: 1(1)                                                     |          |           |           |       |      |       |          |      |        |                         |
|    | GTPase KRas OS=Mus musculus GN=Kras PE=1 SV=1                                                                      |          |           |           |       |      |       |          |      |        |                         |
|    | RASN_MOUSE Mass: 21186 Score: 61 Matches: 1(1) Sequences: 1(1)                                                     |          |           |           |       |      |       |          |      |        |                         |
|    | GTPase NRas OS=Mus musculus GN=Nras PE=1 SV=1                                                                      |          |           |           |       |      |       |          |      |        |                         |
| 6. | LRC45_MOUSE Mass: 76337 Score: 46 Matches: 4(4) Sequences: 1(1) emPAI: 0.12                                        |          |           |           |       |      |       |          |      |        |                         |
|    | Leucine-rich repeat-containing protein 45 OS=Mus musculus GN=Lrrc45 PE=2 SV=2                                      |          |           |           |       |      |       |          |      |        |                         |
|    | Query                                                                                                              | Observed | Mr(expt)  | Mr(calc)  | ppm   | Miss | Score | Expect   | Rank | Unique | Peptide                 |
|    | 786                                                                                                                | 503.7290 | 1005.4435 | 1005.4437 | -0.17 | 0    | (24)  | 0.017    | 1    | U      | K.QNMEDLEK.L 789        |
|    | 839                                                                                                                | 511.7265 | 1021.4384 | 1021.4386 | -0.21 | 0    | 35    | 0.0012   | 1    | U      | K.QNMEDLEK.L 838        |
| 7. | SH2D6_MOUSE Mass: 31996 Score: 44 Matches: 3(3) Sequences: 1(1) emPAI: 0.14                                        |          |           |           |       |      |       |          |      |        |                         |
|    | SH2 domain-containing protein 6 OS=Mus musculus GN=Sh2d6 PE=2 SV=1                                                 |          |           |           |       |      |       |          |      |        |                         |
|    | Query                                                                                                              | Observed | Mr(expt)  | Mr(calc)  | ppm   | Miss | Score | Expect   | Rank | Unique | Peptide                 |
|    | 288                                                                                                                | 438.7158 | 875.4171  | 875.4171  | 0.00  | 0    | 32    | 0.0048   | 1    | U      | R.NGAMDGALK.A 289 291   |
| 8. | KRT81_MOUSE Mass: 52829 Score: 42 Matches: 2(2) Sequences: 1(1) emPAI: 0.08                                        |          |           |           |       |      |       |          |      |        |                         |
|    | Keratin, type II cuticular Hb1 OS=Mus musculus GN=Krt81 PE=2 SV=2                                                  |          |           |           |       |      |       |          |      |        |                         |
|    | Query                                                                                                              | Observed | Mr(expt)  | Mr(calc)  | ppm   | Miss | Score | Expect   | Rank | Unique | Peptide                 |
|    | 1473                                                                                                               | 581.3182 | 1160.6219 | 1160.6223 | -0.33 | 1    | 36    | 0.0027   | 1    | U      | K.CEEIKATVIR.H 1475     |



|     |                                                                                                                                                                               |          |          |          |       |      |       |        |      |        |                         |
|-----|-------------------------------------------------------------------------------------------------------------------------------------------------------------------------------|----------|----------|----------|-------|------|-------|--------|------|--------|-------------------------|
|     | KRT86_MOUSE Mass: 53217 Score: 42 Matches: 2(2) Sequences: 1(1)<br>Keratin, type II cuticular Hb6 OS=Mus musculus GN=Krt86 PE=2 SV=2                                          |          |          |          |       |      |       |        |      |        |                         |
| 9.  | DC1L2_MOUSE Mass: 54185 Score: 40 Matches: 2(2) Sequences: 1(1) emPAI: 0.08<br>Cytoplasmic dynein 1 light intermediate chain 2 OS=Mus musculus GN=Dync1li2 PE=1 SV=2          |          |          |          |       |      |       |        |      |        |                         |
|     | Query                                                                                                                                                                         | Observed | Mr(expt) | Mr(calc) | ppm   | Miss | Score | Expect | Rank | Unique | Peptide                 |
|     | 299                                                                                                                                                                           | 439.7525 | 877.4904 | 877.4909 | -0.50 | 0    | 36    | 0.001  | 1    | U      | K.NLDLLYK.Y 304         |
| 10. | RB33A_MOUSE Mass: 26523 Score: 38 Matches: 4(4) Sequences: 1(1) emPAI: 0.17<br>Ras-related protein Rab-33A OS=Mus musculus GN=Rab33a PE=2 SV=1                                |          |          |          |       |      |       |        |      |        |                         |
|     | Query                                                                                                                                                                         | Observed | Mr(expt) | Mr(calc) | ppm   | Miss | Score | Expect | Rank | Unique | Peptide                 |
|     | 178                                                                                                                                                                           | 408.2403 | 814.4660 | 814.4661 | -0.06 | 1    | 31    | 0.0073 | 1    | U      | R.QQGKVQK.L 175 180 183 |
| 11. | PRP18_MOUSE Mass: 39865 Score: 36 Matches: 1(1) Sequences: 1(1) emPAI: 0.11<br>Pre-mRNA-splicing factor 18 OS=Mus musculus GN=Prpf18 PE=1 SV=1                                |          |          |          |       |      |       |        |      |        |                         |
|     | Query                                                                                                                                                                         | Observed | Mr(expt) | Mr(calc) | ppm   | Miss | Score | Expect | Rank | Unique | Peptide                 |
|     | 199                                                                                                                                                                           | 415.2427 | 828.4708 | 828.4705 | 0.38  | 0    | 36    | 0.0017 | 1    | U      | R.NLLVENK.K             |
| 12. | ATF5_MOUSE Mass: 30312 Score: 35 Matches: 1(1) Sequences: 1(1) emPAI: 0.15<br>Cyclic AMP-dependent transcription factor ATF-5 OS=Mus musculus GN=Atf5 PE=1 SV=2               |          |          |          |       |      |       |        |      |        |                         |
|     | Query                                                                                                                                                                         | Observed | Mr(expt) | Mr(calc) | ppm   | Miss | Score | Expect | Rank | Unique | Peptide                 |
|     | 748                                                                                                                                                                           | 496.7869 | 991.5592 | 991.5590 | 0.28  | 0    | 35    | 0.0013 | 1    | U      | K.DLLIEVYK.A            |
| 13. | MPP8_MOUSE Mass: 97407 Score: 35 Matches: 2(2) Sequences: 1(1) emPAI: 0.04<br>M-phase phosphoprotein 8 OS=Mus musculus GN=Mphosph8 PE=1 SV=1                                  |          |          |          |       |      |       |        |      |        |                         |
|     | Query                                                                                                                                                                         | Observed | Mr(expt) | Mr(calc) | ppm   | Miss | Score | Expect | Rank | Unique | Peptide                 |
|     | 159                                                                                                                                                                           | 403.2501 | 804.4857 | 804.4857 | -0.07 | 0    | 29    | 0.0028 | 1    | U      | K.LLIGAYR.V 158         |
| 14. | ARGAL_MOUSE Mass: 139898 Score: 35 Matches: 1(1) Sequences: 1(1) emPAI: 0.03<br>Rho guanine nucleotide exchange factor 10-like protein OS=Mus musculus GN=Arhgef10l PE=1 SV=1 |          |          |          |       |      |       |        |      |        |                         |
|     | Query                                                                                                                                                                         | Observed | Mr(expt) | Mr(calc) | ppm   | Miss | Score | Expect | Rank | Unique | Peptide                 |
|     | 259                                                                                                                                                                           | 431.7608 | 861.5070 | 861.5072 | -0.27 | 0    | 35    | 0.0015 | 1    | U      | K.GILLQYR.L             |

|     |                                                                          |              |           |               |                 |             |       |        |      |        |                 |
|-----|--------------------------------------------------------------------------|--------------|-----------|---------------|-----------------|-------------|-------|--------|------|--------|-----------------|
| 15. | CP250_MOUSE                                                              | Mass: 276647 | Score: 33 | Matches: 1(1) | Sequences: 1(1) | emPAI: 0.02 |       |        |      |        |                 |
|     | Centrosome-associated protein CEP250 OS=Mus musculus GN=Cep250 PE=1 SV=4 |              |           |               |                 |             |       |        |      |        |                 |
|     | Query                                                                    | Observed     | Mr(expt)  | Mr(calc)      | ppm             | Miss        | Score | Expect | Rank | Unique | Peptide         |
|     | 1239                                                                     | 559.8321     | 1117.6497 | 1117.6608     | -9.84           | 1           | 33    | 0.0026 | 1    | U      | K.LQAKVLQYR.S   |
| 16. | FBXL2_MOUSE                                                              | Mass: 46860  | Score: 33 | Matches: 1(1) | Sequences: 1(1) | emPAI: 0.10 |       |        |      |        |                 |
|     | F-box/LRR-repeat protein 2 OS=Mus musculus GN=Fbxl2 PE=1 SV=1            |              |           |               |                 |             |       |        |      |        |                 |
|     | Query                                                                    | Observed     | Mr(expt)  | Mr(calc)      | ppm             | Miss        | Score | Expect | Rank | Unique | Peptide         |
|     | 137                                                                      | 394.7291     | 787.4436  | 787.4440      | -0.49           | 0           | 33    | 0.0045 | 1    | U      | R.VVENISK.R     |
|     | FXL20_MOUSE                                                              | Mass: 48365  | Score: 33 | Matches: 1(1) | Sequences: 1(1) |             |       |        |      |        |                 |
|     | F-box/LRR-repeat protein 20 OS=Mus musculus GN=Fbxl20 PE=1 SV=3          |              |           |               |                 |             |       |        |      |        |                 |
| 17. | DOCK3_MOUSE                                                              | Mass: 232760 | Score: 32 | Matches: 1(1) | Sequences: 1(1) | emPAI: 0.02 |       |        |      |        |                 |
|     | Dedicator of cytokinesis protein 3 OS=Mus musculus GN=Dock3 PE=1 SV=1    |              |           |               |                 |             |       |        |      |        |                 |
|     | Query                                                                    | Observed     | Mr(expt)  | Mr(calc)      | ppm             | Miss        | Score | Expect | Rank | Unique | Peptide         |
|     | 1990                                                                     | 623.3435     | 1244.6725 | 1244.6837     | -9.01           | 1           | 32    | 0.0065 | 1    | U      | K.LQSIARTVDSR.L |
| 18. | UB2E3_MOUSE                                                              | Mass: 22898  | Score: 29 | Matches: 1(1) | Sequences: 1(1) | emPAI: 0.20 |       |        |      |        |                 |
|     | Ubiquitin-conjugating enzyme E2 E3 OS=Mus musculus GN=Ube2e3 PE=1 SV=2   |              |           |               |                 |             |       |        |      |        |                 |
|     | Query                                                                    | Observed     | Mr(expt)  | Mr(calc)      | ppm             | Miss        | Score | Expect | Rank | Unique | Peptide         |
|     | 331                                                                      | 444.2509     | 886.4871  | 886.4872      | -0.07           | 0           | 29    | 0.014  | 1    | U      | R.KPSATQQK.K    |
| 19. | GLCE_MOUSE                                                               | Mass: 70045  | Score: 29 | Matches: 1(1) | Sequences: 1(1) | emPAI: 0.06 |       |        |      |        |                 |
|     | D-glucuronyl C5-epimerase OS=Mus musculus GN=Glce PE=1 SV=2              |              |           |               |                 |             |       |        |      |        |                 |
|     | Query                                                                    | Observed     | Mr(expt)  | Mr(calc)      | ppm             | Miss        | Score | Expect | Rank | Unique | Peptide         |
|     | 1123                                                                     | 549.2969     | 1096.5792 | 1096.5805     | -1.14           | 0           | 29    | 0.0083 | 1    | U      | K.DFIISFDLK.L   |
| 20. | INT5_MOUSE                                                               | Mass: 108279 | Score: 29 | Matches: 1(1) | Sequences: 1(1) | emPAI: 0.04 |       |        |      |        |                 |
|     | Integrator complex subunit 5 OS=Mus musculus GN=Ints5 PE=2 SV=1          |              |           |               |                 |             |       |        |      |        |                 |
|     | Query                                                                    | Observed     | Mr(expt)  | Mr(calc)      | ppm             | Miss        | Score | Expect | Rank | Unique | Peptide         |
|     | 65                                                                       | 375.2190     | 748.4235  | 748.4232      | 0.42            | 0           | 29    | 0.0016 | 1    | U      | R.LGLFSGR.F     |
| 21. | LRC71_MOUSE                                                              | Mass: 61313  | Score: 28 | Matches: 1(1) | Sequences: 1(1) | emPAI: 0.07 |       |        |      |        |                 |

|     |                                                                                                                                                       |          |           |           |       |      |       |        |      |        |                    |  |
|-----|-------------------------------------------------------------------------------------------------------------------------------------------------------|----------|-----------|-----------|-------|------|-------|--------|------|--------|--------------------|--|
|     | Leucine-rich repeat-containing protein 71 OS=Mus musculus GN=Lrrc71 PE=2 SV=1                                                                         |          |           |           |       |      |       |        |      |        |                    |  |
|     | Query                                                                                                                                                 | Observed | Mr(expt)  | Mr(calc)  | ppm   | Miss | Score | Expect | Rank | Unique | Peptide            |  |
|     | 372                                                                                                                                                   | 451.7631 | 901.5116  | 901.5055  | 6.74  | 1    | 28    | 0.016  | 1    | U      | K.MQSLKAPK.T       |  |
| 22. | BLM_MOUSE Mass: 158266 Score: 27 Matches: 2(2) Sequences: 1(1) emPAI: 0.03<br>Bloom syndrome protein homolog OS=Mus musculus GN=Blm PE=1 SV=1         |          |           |           |       |      |       |        |      |        |                    |  |
|     | Query                                                                                                                                                 | Observed | Mr(expt)  | Mr(calc)  | ppm   | Miss | Score | Expect | Rank | Unique | Peptide            |  |
|     | 428                                                                                                                                                   | 460.7577 | 919.5008  | 919.4983  | 2.69  | 1    | 27    | 0.014  | 1    | U      | K.RLIMMEK.D 429    |  |
| 23. | SPA3G_MOUSE Mass: 48990 Score: 27 Matches: 2(2) Sequences: 1(1) emPAI: 0.09<br>Serine protease inhibitor A3G OS=Mus musculus GN=Serpina3g PE=1 SV=2   |          |           |           |       |      |       |        |      |        |                    |  |
|     | Query                                                                                                                                                 | Observed | Mr(expt)  | Mr(calc)  | ppm   | Miss | Score | Expect | Rank | Unique | Peptide            |  |
|     | 857                                                                                                                                                   | 515.7401 | 1029.4657 | 1029.4655 | 0.19  | 0    | 24    | 0.014  | 1    | U      | K.SEFYLDEK.R 856   |  |
| 24. | PCBP3_MOUSE Mass: 39269 Score: 27 Matches: 1(1) Sequences: 1(1) emPAI: 0.11<br>Poly(rC)-binding protein 3 OS=Mus musculus GN=Pcbp3 PE=1 SV=3          |          |           |           |       |      |       |        |      |        |                    |  |
|     | Query                                                                                                                                                 | Observed | Mr(expt)  | Mr(calc)  | ppm   | Miss | Score | Expect | Rank | Unique | Peptide            |  |
|     | 1316                                                                                                                                                  | 567.7702 | 1133.5258 | 1133.5313 | -4.77 | 0    | 27    | 0.015  | 1    | U      | K.IANATEGSSER.Q    |  |
| 25. | BEND3_MOUSE Mass: 94096 Score: 27 Matches: 1(1) Sequences: 1(1) emPAI: 0.05<br>BEN domain-containing protein 3 OS=Mus musculus GN=Bend3 PE=1 SV=1     |          |           |           |       |      |       |        |      |        |                    |  |
|     | Query                                                                                                                                                 | Observed | Mr(expt)  | Mr(calc)  | ppm   | Miss | Score | Expect | Rank | Unique | Peptide            |  |
|     | 254                                                                                                                                                   | 429.2455 | 856.4765  | 856.4767  | -0.15 | 1    | 27    | 0.015  | 1    | U      | K.KQLDPTR.L        |  |
| 26. | DNJC1_MOUSE Mass: 63830 Score: 27 Matches: 1(1) Sequences: 1(1) emPAI: 0.07<br>DnaJ homolog subfamily C member 1 OS=Mus musculus GN=Dnajc1 PE=1 SV=1  |          |           |           |       |      |       |        |      |        |                    |  |
|     | Query                                                                                                                                                 | Observed | Mr(expt)  | Mr(calc)  | ppm   | Miss | Score | Expect | Rank | Unique | Peptide            |  |
|     | 537                                                                                                                                                   | 471.3052 | 940.5959  | 940.5957  | 0.18  | 0    | 27    | 0.0072 | 1    | U      | K.LLVELVQK.K       |  |
| 27. | LIN41_MOUSE Mass: 91996 Score: 26 Matches: 1(1) Sequences: 1(1) emPAI: 0.05<br>E3 ubiquitin-protein ligase TRIM71 OS=Mus musculus GN=Trim71 PE=1 SV=1 |          |           |           |       |      |       |        |      |        |                    |  |
|     | Query                                                                                                                                                 | Observed | Mr(expt)  | Mr(calc)  | ppm   | Miss | Score | Expect | Rank | Unique | Peptide            |  |
|     | 2012                                                                                                                                                  | 624.8510 | 1247.6873 | 1247.6874 | -0.01 | 0    | 26    | 0.021  | 1    | U      | R.LPAPGGAGPAEALK.L |  |

|     |                                                                           |              |           |               |                 |             |       |        |      |        |                     |  |
|-----|---------------------------------------------------------------------------|--------------|-----------|---------------|-----------------|-------------|-------|--------|------|--------|---------------------|--|
| 28. | CR025_MOUSE                                                               | Mass: 26430  | Score: 26 | Matches: 1(1) | Sequences: 1(1) | emPAI: 0.17 |       |        |      |        |                     |  |
|     | Uncharacterized protein C18orf25 homolog OS=Mus musculus PE=1 SV=1        |              |           |               |                 |             |       |        |      |        |                     |  |
|     | Query                                                                     | Observed     | Mr(expt)  | Mr(calc)      | ppm             | Miss        | Score | Expect | Rank | Unique | Peptide             |  |
|     | 91                                                                        | 382.1865     | 762.3585  | 762.3582      | 0.42            | 0           | 26    | 0.0051 | 1    | U      | K.MEEAVGK.V         |  |
| 29. | SPCS2_MOUSE                                                               | Mass: 24962  | Score: 26 | Matches: 1(1) | Sequences: 1(1) | emPAI: 0.18 |       |        |      |        |                     |  |
|     | Signal peptidase complex subunit 2 OS=Mus musculus GN=Spcs2 PE=1 SV=1     |              |           |               |                 |             |       |        |      |        |                     |  |
|     | Query                                                                     | Observed     | Mr(expt)  | Mr(calc)      | ppm             | Miss        | Score | Expect | Rank | Unique | Peptide             |  |
|     | 1507                                                                      | 585.8398     | 1169.6651 | 1169.6656     | -0.38           | 1           | 26    | 0.015  | 1    | U      | K.IDDKPVKIDK.W      |  |
| 30. | DPYL3_MOUSE                                                               | Mass: 61897  | Score: 26 | Matches: 2(2) | Sequences: 1(1) | emPAI: 0.07 |       |        |      |        |                     |  |
|     | Dihydropyrimidinase-related protein 3 OS=Mus musculus GN=Dpysl3 PE=1 SV=1 |              |           |               |                 |             |       |        |      |        |                     |  |
|     | Query                                                                     | Observed     | Mr(expt)  | Mr(calc)      | ppm             | Miss        | Score | Expect | Rank | Unique | Peptide             |  |
|     | 415                                                                       | 459.7451     | 917.4756  | 917.4818      | -6.79           | 0           | 26    | 0.036  | 1    | U      | K.QEVQSLSK.E 416    |  |
| 31. | UN13A_MOUSE                                                               | Mass: 193660 | Score: 26 | Matches: 1(1) | Sequences: 1(1) | emPAI: 0.02 |       |        |      |        |                     |  |
|     | Protein unc-13 homolog A OS=Mus musculus GN=Unc13a PE=1 SV=3              |              |           |               |                 |             |       |        |      |        |                     |  |
|     | Query                                                                     | Observed     | Mr(expt)  | Mr(calc)      | ppm             | Miss        | Score | Expect | Rank | Unique | Peptide             |  |
|     | 115                                                                       | 387.7214     | 773.4282  | 773.4283      | -0.14           | 0           | 26    | 0.018  | 1    | U      | K.ELGQLSK.L         |  |
| 32. | RBP1_MOUSE                                                                | Mass: 74997  | Score: 26 | Matches: 1(1) | Sequences: 1(1) | emPAI: 0.06 |       |        |      |        |                     |  |
|     | RalA-binding protein 1 OS=Mus musculus GN=Ralbp1 PE=1 SV=4                |              |           |               |                 |             |       |        |      |        |                     |  |
|     | Query                                                                     | Observed     | Mr(expt)  | Mr(calc)      | ppm             | Miss        | Score | Expect | Rank | Unique | Peptide             |  |
|     | 888                                                                       | 521.7921     | 1041.5697 | 1041.5706     | -0.90           | 0           | 26    | 0.018  | 1    | U      | R.DLPENLLTK.E       |  |
| 33. | K1C28_MOUSE                                                               | Mass: 50315  | Score: 26 | Matches: 1(1) | Sequences: 1(1) | emPAI: 0.09 |       |        |      |        |                     |  |
|     | Keratin, type I cytoskeletal 28 OS=Mus musculus GN=Krt28 PE=1 SV=1        |              |           |               |                 |             |       |        |      |        |                     |  |
|     | Query                                                                     | Observed     | Mr(expt)  | Mr(calc)      | ppm             | Miss        | Score | Expect | Rank | Unique | Peptide             |  |
|     | 1222                                                                      | 557.2769     | 1112.5393 | 1112.5397     | -0.35           | 1           | 26    | 0.022  | 1    | U      | -.MSLRFSGGSR.H      |  |
| 34. | TM11G_MOUSE                                                               | Mass: 46584  | Score: 26 | Matches: 2(2) | Sequences: 1(1) | emPAI: 0.10 |       |        |      |        |                     |  |
|     | Transmembrane protease serine 11G OS=Mus musculus GN=Tmprss11g PE=2 SV=2  |              |           |               |                 |             |       |        |      |        |                     |  |
|     | Query                                                                     | Observed     | Mr(expt)  | Mr(calc)      | ppm             | Miss        | Score | Expect | Rank | Unique | Peptide             |  |
|     | 1464                                                                      | 580.3448     | 1158.6750 | 1158.6720     | 2.58            | 1           | 23    | 0.02   | 1    | U      | K.LQSSQSILKR.D 1466 |  |

|     |                                                                                                                                                                                 |          |           |           |       |      |       |        |      |        |                        |
|-----|---------------------------------------------------------------------------------------------------------------------------------------------------------------------------------|----------|-----------|-----------|-------|------|-------|--------|------|--------|------------------------|
| 35. | TCAL9_MOUSE Mass: 12656 Score: 26 Matches: 1(1) Sequences: 1(1) emPAI: 0.39<br>Transcription elongation factor A protein-like 9 OS=Mus musculus GN=Tceal9 PE=3 SV=1             |          |           |           |       |      |       |        |      |        |                        |
|     | Query                                                                                                                                                                           | Observed | Mr(expt)  | Mr(calc)  | ppm   | Miss | Score | Expect | Rank | Unique | Peptide                |
|     | 188                                                                                                                                                                             | 410.6972 | 819.3798  | 819.3796  | 0.20  | 0    | 26    | 0.013  | 1    | U      | K.MEGNLEK.E            |
| 36. | CTTB2_MOUSE Mass: 178662 Score: 26 Matches: 3(3) Sequences: 1(1) emPAI: 0.02<br>Cortactin-binding protein 2 OS=Mus musculus GN=Cttnbp2 PE=1 SV=2                                |          |           |           |       |      |       |        |      |        |                        |
|     | Query                                                                                                                                                                           | Observed | Mr(expt)  | Mr(calc)  | ppm   | Miss | Score | Expect | Rank | Unique | Peptide                |
|     | 1000                                                                                                                                                                            | 533.2950 | 1064.5755 | 1064.5727 | 2.68  | 0    | 23    | 0.034  | 1    | U      | K.TIPHLNTR.N 1002 1003 |
| 37. | DCLK1_MOUSE Mass: 84101 Score: 26 Matches: 1(1) Sequences: 1(1) emPAI: 0.05<br>Serine/threonine-protein kinase DCLK1 OS=Mus musculus GN=Dclk1 PE=1 SV=1                         |          |           |           |       |      |       |        |      |        |                        |
|     | Query                                                                                                                                                                           | Observed | Mr(expt)  | Mr(calc)  | ppm   | Miss | Score | Expect | Rank | Unique | Peptide                |
|     | 1934                                                                                                                                                                            | 618.3293 | 1234.6441 | 1234.6557 | -9.38 | 0    | 26    | 0.033  | 1    | U      | R.SFEALLDLTR.T         |
| 38. | PTK6_MOUSE Mass: 51939 Score: 25 Matches: 1(1) Sequences: 1(1) emPAI: 0.09<br>Protein-tyrosine kinase 6 OS=Mus musculus GN=Ptk6 PE=1 SV=1                                       |          |           |           |       |      |       |        |      |        |                        |
|     | Query                                                                                                                                                                           | Observed | Mr(expt)  | Mr(calc)  | ppm   | Miss | Score | Expect | Rank | Unique | Peptide                |
|     | 3950                                                                                                                                                                            | 506.9473 | 1517.8201 | 1517.8202 | -0.08 | 0    | 25    | 0.031  | 1    | U      | R.VSQKPGADYVLSVR.D     |
| 39. | PLXB3_MOUSE Mass: 208233 Score: 25 Matches: 1(1) Sequences: 1(1) emPAI: 0.02<br>Plexin-B3 OS=Mus musculus GN=Plxnb3 PE=1 SV=2                                                   |          |           |           |       |      |       |        |      |        |                        |
|     | Query                                                                                                                                                                           | Observed | Mr(expt)  | Mr(calc)  | ppm   | Miss | Score | Expect | Rank | Unique | Peptide                |
|     | 2072                                                                                                                                                                            | 631.3553 | 1260.6960 | 1260.7078 | -9.31 | 0    | 25    | 0.032  | 1    | U      | R.LQQVAALVEYK.V        |
| 40. | ERCC3_MOUSE Mass: 89070 Score: 25 Matches: 1(1) Sequences: 1(1) emPAI: 0.05<br>TFIIH basal transcription factor complex helicase XPB subunit OS=Mus musculus GN=Ercc3 PE=2 SV=1 |          |           |           |       |      |       |        |      |        |                        |
|     | Query                                                                                                                                                                           | Observed | Mr(expt)  | Mr(calc)  | ppm   | Miss | Score | Expect | Rank | Unique | Peptide                |
|     | 4473                                                                                                                                                                            | 816.9244 | 1631.8342 | 1631.8341 | 0.05  | 0    | 25    | 0.043  | 1    | U      | R.CLVLGNSAVSVEQWK.A    |
| 41. | DDX54_MOUSE Mass: 97687 Score: 25 Matches: 1(1) Sequences: 1(1) emPAI: 0.04<br>ATP-dependent RNA helicase DDX54 OS=Mus musculus GN=Ddx54 PE=1 SV=1                              |          |           |           |       |      |       |        |      |        |                        |
|     | Query                                                                                                                                                                           | Observed | Mr(expt)  | Mr(calc)  | ppm   | Miss | Score | Expect | Rank | Unique | Peptide                |

|     |                                                                                                                                                                                      |          |           |           |       |      |       |        |      |        |                     |
|-----|--------------------------------------------------------------------------------------------------------------------------------------------------------------------------------------|----------|-----------|-----------|-------|------|-------|--------|------|--------|---------------------|
|     | 4034                                                                                                                                                                                 | 514.6291 | 1540.8654 | 1540.8685 | -1.99 | 1    | 25    | 0.021  | 1    | U      | R.SAQTGARALILSPTR.E |
| 42. | TRPC5_MOUSE Mass: 111387 Score: 25 Matches: 1(1) Sequences: 1(1) emPAI: 0.04<br>Short transient receptor potential channel 5 OS=Mus musculus GN=Trpc5 PE=1 SV=2                      |          |           |           |       |      |       |        |      |        |                     |
|     | Query                                                                                                                                                                                | Observed | Mr(expt)  | Mr(calc)  | ppm   | Miss | Score | Expect | Rank | Unique | Peptide             |
|     | 3426                                                                                                                                                                                 | 483.2729 | 1446.7969 | 1446.8082 | -7.80 | 0    | 25    | 0.029  | 1    | U      | K.EVVGAVELLLSYR.K   |
| 43. | DDIAS_MOUSE Mass: 99883 Score: 24 Matches: 1(1) Sequences: 1(1) emPAI: 0.04<br>DNA damage-induced apoptosis suppressor protein OS=Mus musculus GN=Ddias PE=2 SV=1                    |          |           |           |       |      |       |        |      |        |                     |
|     | Query                                                                                                                                                                                | Observed | Mr(expt)  | Mr(calc)  | ppm   | Miss | Score | Expect | Rank | Unique | Peptide             |
|     | 2479                                                                                                                                                                                 | 441.9213 | 1322.7421 | 1322.7380 | 3.07  | 2    | 24    | 0.018  | 1    | U      | R.CFSKIILESKR.F     |
| 44. | JHD2C_MOUSE Mass: 260479 Score: 24 Matches: 1(1) Sequences: 1(1) emPAI: 0.02<br>Probable JmjC domain-containing histone demethylation protein 2C OS=Mus musculus GN=Jmjd1c PE=1 SV=3 |          |           |           |       |      |       |        |      |        |                     |
|     | Query                                                                                                                                                                                | Observed | Mr(expt)  | Mr(calc)  | ppm   | Miss | Score | Expect | Rank | Unique | Peptide             |
|     | 280                                                                                                                                                                                  | 437.2429 | 872.4712  | 872.4716  | -0.38 | 1    | 24    | 0.048  | 1    | U      | K.KQNDLQK.R         |
| 45. | ZDBF2_MOUSE Mass: 273578 Score: 24 Matches: 1(1) Sequences: 1(1) emPAI: 0.02<br>DBF4-type zinc finger-containing protein 2 homolog OS=Mus musculus GN=Zdbf2 PE=2 SV=1                |          |           |           |       |      |       |        |      |        |                     |
|     | Query                                                                                                                                                                                | Observed | Mr(expt)  | Mr(calc)  | ppm   | Miss | Score | Expect | Rank | Unique | Peptide             |
|     | 110                                                                                                                                                                                  | 385.7295 | 769.4444  | 769.4446  | -0.24 | 1    | 24    | 0.011  | 1    | U      | R.EGAIPKR.R         |
| 46. | BRE1A_MOUSE Mass: 113450 Score: 24 Matches: 1(1) Sequences: 1(1) emPAI: 0.04<br>E3 ubiquitin-protein ligase BRE1A OS=Mus musculus GN=Rnf20 PE=1 SV=2                                 |          |           |           |       |      |       |        |      |        |                     |
|     | Query                                                                                                                                                                                | Observed | Mr(expt)  | Mr(calc)  | ppm   | Miss | Score | Expect | Rank | Unique | Peptide             |
|     | 4575                                                                                                                                                                                 | 834.9477 | 1667.8808 | 1667.8856 | -2.84 | 0    | 24    | 0.04   | 1    | U      | R.HLISSLQNHNLK.G    |
|     | BRE1B_MOUSE Mass: 113897 Score: 24 Matches: 1(1) Sequences: 1(1)<br>E3 ubiquitin-protein ligase BRE1B OS=Mus musculus GN=Rnf40 PE=1 SV=2                                             |          |           |           |       |      |       |        |      |        |                     |
| 47. | CMTA1_MOUSE Mass: 184202 Score: 24 Matches: 1(1) Sequences: 1(1) emPAI: 0.02<br>Calmodulin-binding transcription activator 1 OS=Mus musculus GN=Camta1 PE=2 SV=1                     |          |           |           |       |      |       |        |      |        |                     |
|     | Query                                                                                                                                                                                | Observed | Mr(expt)  | Mr(calc)  | ppm   | Miss | Score | Expect | Rank | Unique | Peptide             |
|     | 1686                                                                                                                                                                                 | 602.3418 | 1202.6690 | 1202.6693 | -0.18 | 0    | 24    | 0.04   | 1    | U      | K.MTQAAILIQSK.F     |

|     |                                                                                                                                                                |          |           |           |       |      |       |        |      |        |                   |
|-----|----------------------------------------------------------------------------------------------------------------------------------------------------------------|----------|-----------|-----------|-------|------|-------|--------|------|--------|-------------------|
|     | CMTA2_MOUSE Mass: 131927 Score: 24 Matches: 1(1) Sequences: 1(1)<br>Calmodulin-binding transcription activator 2 OS=Mus musculus GN=Camta2 PE=2 SV=1           |          |           |           |       |      |       |        |      |        |                   |
| 48. | FA7_MOUSE Mass: 50244 Score: 24 Matches: 1(1) Sequences: 1(1) emPAI: 0.09<br>Coagulation factor VII OS=Mus musculus GN=F7 PE=2 SV=1                            |          |           |           |       |      |       |        |      |        |                   |
|     | Query                                                                                                                                                          | Observed | Mr(expt)  | Mr(calc)  | ppm   | Miss | Score | Expect | Rank | Unique | Peptide           |
|     | 1684                                                                                                                                                           | 601.8345 | 1201.6545 | 1201.6489 | 4.67  | 1    | 24    | 0.038  | 1    | U      | R.RVTQVIMPDK.Y    |
| 49. | RHG30_MOUSE Mass: 120040 Score: 24 Matches: 1(1) Sequences: 1(1) emPAI: 0.04<br>Rho GTPase-activating protein 30 OS=Mus musculus GN=Arhgap30 PE=1 SV=3         |          |           |           |       |      |       |        |      |        |                   |
|     | Query                                                                                                                                                          | Observed | Mr(expt)  | Mr(calc)  | ppm   | Miss | Score | Expect | Rank | Unique | Peptide           |
|     | 2671                                                                                                                                                           | 449.8762 | 1346.6067 | 1346.6062 | 0.40  | 1    | 24    | 0.028  | 1    | U      | K.ADAEGGEAERSQK.V |
| 50. | CF157_MOUSE Mass: 61010 Score: 23 Matches: 1(1) Sequences: 1(1) emPAI: 0.07<br>Cilia- and flagella-associated protein 157 OS=Mus musculus GN=Cfap157 PE=2 SV=1 |          |           |           |       |      |       |        |      |        |                   |
|     | Query                                                                                                                                                          | Observed | Mr(expt)  | Mr(calc)  | ppm   | Miss | Score | Expect | Rank | Unique | Peptide           |
|     | 32                                                                                                                                                             | 364.7240 | 727.4335  | 727.4341  | -0.75 | 1    | 23    | 0.0097 | 1    | U      | K.KPNKGGK.E       |
| 51. | IL23R_MOUSE Mass: 73406 Score: 23 Matches: 1(1) Sequences: 1(1) emPAI: 0.06<br>Interleukin-23 receptor OS=Mus musculus GN=Il23r PE=2 SV=1                      |          |           |           |       |      |       |        |      |        |                   |
|     | Query                                                                                                                                                          | Observed | Mr(expt)  | Mr(calc)  | ppm   | Miss | Score | Expect | Rank | Unique | Peptide           |
|     | 298                                                                                                                                                            | 439.7113 | 877.4080  | 877.4076  | 0.52  | 1    | 23    | 0.034  | 1    | U      | R.CQETGKR.N       |
| 52. | IQCD_MOUSE Mass: 53318 Score: 23 Matches: 1(1) Sequences: 1(1) emPAI: 0.08<br>IQ domain-containing protein D OS=Mus musculus GN=lqcd PE=2 SV=1                 |          |           |           |       |      |       |        |      |        |                   |
|     | Query                                                                                                                                                          | Observed | Mr(expt)  | Mr(calc)  | ppm   | Miss | Score | Expect | Rank | Unique | Peptide           |
|     | 548                                                                                                                                                            | 472.7797 | 943.5449  | 943.5450  | -0.17 | 1    | 23    | 0.038  | 1    | U      | K.LNTIEAKR.I      |
| 53. | CH033_MOUSE Mass: 24450 Score: 23 Matches: 1(1) Sequences: 1(1) emPAI: 0.19<br>UPF0488 protein C8orf33 homolog OS=Mus musculus PE=2 SV=1                       |          |           |           |       |      |       |        |      |        |                   |
|     | Query                                                                                                                                                          | Observed | Mr(expt)  | Mr(calc)  | ppm   | Miss | Score | Expect | Rank | Unique | Peptide           |
|     | 221                                                                                                                                                            | 422.2379 | 842.4612  | 842.4610  | 0.25  | 0    | 23    | 0.037  | 1    | U      | K.EQAVGAIR.T      |

|     |                                                                              |          |           |           |       |      |       |        |      |        |                 |
|-----|------------------------------------------------------------------------------|----------|-----------|-----------|-------|------|-------|--------|------|--------|-----------------|
| 54. | ZN330_MOUSE Mass: 35584 Score: 23 Matches: 1(1) Sequences: 1(1) emPAI: 0.13  |          |           |           |       |      |       |        |      |        |                 |
|     | Zinc finger protein 330 OS=Mus musculus GN=Znf330 PE=1 SV=1                  |          |           |           |       |      |       |        |      |        |                 |
|     | Query                                                                        | Observed | Mr(expt)  | Mr(calc)  | ppm   | Miss | Score | Expect | Rank | Unique | Peptide         |
|     | 2361                                                                         | 655.2871 | 1308.5597 | 1308.5631 | -2.63 | 0    | 23    | 0.02   | 1    | U      | R.AFCYFCNSVQK.L |
| 55. | PCYXL_MOUSE Mass: 54840 Score: 23 Matches: 1(1) Sequences: 1(1) emPAI: 0.08  |          |           |           |       |      |       |        |      |        |                 |
|     | Prenylcysteine oxidase-like OS=Mus musculus GN=Pcyox1l PE=1 SV=1             |          |           |           |       |      |       |        |      |        |                 |
|     | Query                                                                        | Observed | Mr(expt)  | Mr(calc)  | ppm   | Miss | Score | Expect | Rank | Unique | Peptide         |
|     | 669                                                                          | 489.2868 | 976.5591  | 976.5593  | -0.22 | 0    | 23    | 0.025  | 1    | U      | R.VQIVVYEK.G    |
| 56. | ZFA_MOUSE Mass: 84603 Score: 23 Matches: 1(1) Sequences: 1(1) emPAI: 0.05    |          |           |           |       |      |       |        |      |        |                 |
|     | Zinc finger autosomal protein OS=Mus musculus GN=Zfa PE=3 SV=1               |          |           |           |       |      |       |        |      |        |                 |
|     | Query                                                                        | Observed | Mr(expt)  | Mr(calc)  | ppm   | Miss | Score | Expect | Rank | Unique | Peptide         |
|     | 207                                                                          | 419.1977 | 836.3809  | 836.3876  | -7.90 | 0    | 23    | 0.027  | 1    | U      | K.SSNSSDLK.R    |
|     | ZFX_MOUSE Mass: 89969 Score: 23 Matches: 1(1) Sequences: 1(1)                |          |           |           |       |      |       |        |      |        |                 |
|     | Zinc finger X-chromosomal protein OS=Mus musculus GN=Zfx PE=1 SV=2           |          |           |           |       |      |       |        |      |        |                 |
|     | ZFY1_MOUSE Mass: 88174 Score: 23 Matches: 1(1) Sequences: 1(1)               |          |           |           |       |      |       |        |      |        |                 |
|     | Zinc finger Y-chromosomal protein 1 OS=Mus musculus GN=Zfy1 PE=2 SV=3        |          |           |           |       |      |       |        |      |        |                 |
|     | ZFY2_MOUSE Mass: 88071 Score: 23 Matches: 1(1) Sequences: 1(1)               |          |           |           |       |      |       |        |      |        |                 |
|     | Zinc finger Y-chromosomal protein 2 OS=Mus musculus GN=Zfy2 PE=2 SV=2        |          |           |           |       |      |       |        |      |        |                 |
| 57. | AT8A2_MOUSE Mass: 129333 Score: 23 Matches: 1(1) Sequences: 1(1) emPAI: 0.03 |          |           |           |       |      |       |        |      |        |                 |
|     | Phospholipid-transporting ATPase IB OS=Mus musculus GN=Atp8a2 PE=1 SV=1      |          |           |           |       |      |       |        |      |        |                 |
|     | Query                                                                        | Observed | Mr(expt)  | Mr(calc)  | ppm   | Miss | Score | Expect | Rank | Unique | Peptide         |
|     | 350                                                                          | 448.7530 | 895.4914  | 895.4916  | -0.27 | 0    | 23    | 0.034  | 1    | U      | K.LGFVFTGR.T    |
| 58. | IPO9_MOUSE Mass: 115978 Score: 22 Matches: 1(1) Sequences: 1(1) emPAI: 0.04  |          |           |           |       |      |       |        |      |        |                 |
|     | Importin-9 OS=Mus musculus GN=Ipo9 PE=1 SV=3                                 |          |           |           |       |      |       |        |      |        |                 |
|     | Query                                                                        | Observed | Mr(expt)  | Mr(calc)  | ppm   | Miss | Score | Expect | Rank | Unique | Peptide         |
|     | 1364                                                                         | 572.8578 | 1143.7011 | 1143.6975 | 3.15  | 1    | 22    | 0.013  | 1    | U      | R.LVSTLISKAGR.E |
| 59. | E2F6_MOUSE Mass: 30833 Score: 22 Matches: 1(1) Sequences: 1(1) emPAI: 0.15   |          |           |           |       |      |       |        |      |        |                 |
|     | Transcription factor E2F6 OS=Mus musculus GN=E2f6 PE=2 SV=2                  |          |           |           |       |      |       |        |      |        |                 |



|     | Query                                                                                                                                                   | Observed | Mr(expt)  | Mr(calc)  | ppm   | Miss | Score | Expect | Rank | Unique | Peptide          |
|-----|---------------------------------------------------------------------------------------------------------------------------------------------------------|----------|-----------|-----------|-------|------|-------|--------|------|--------|------------------|
|     | 1758                                                                                                                                                    | 606.8292 | 1211.6438 | 1211.6550 | -9.29 | 0    | 22    | 0.048  | 1    | U      | R.FDVSLVYLTR.K   |
| 60. | SYCC_MOUSE Mass: 94800 Score: 22 Matches: 1(1) Sequences: 1(1) emPAI: 0.05<br>Cysteine--tRNA ligase, cytoplasmic OS=Mus musculus GN=Cars PE=1 SV=2      |          |           |           |       |      |       |        |      |        |                  |
|     | Query                                                                                                                                                   | Observed | Mr(expt)  | Mr(calc)  | ppm   | Miss | Score | Expect | Rank | Unique | Peptide          |
|     | 2960                                                                                                                                                    | 698.8887 | 1395.7629 | 1395.7762 | -9.49 | 2    | 22    | 0.039  | 1    | U      | K.KLFEAQEKLYK.E  |
| 61. | VATE1_MOUSE Mass: 26141 Score: 22 Matches: 1(1) Sequences: 1(1) emPAI: 0.17<br>V-type proton ATPase subunit E 1 OS=Mus musculus GN=Atp6v1e1 PE=1 SV=2   |          |           |           |       |      |       |        |      |        |                  |
|     | Query                                                                                                                                                   | Observed | Mr(expt)  | Mr(calc)  | ppm   | Miss | Score | Expect | Rank | Unique | Peptide          |
|     | 1834                                                                                                                                                    | 610.3500 | 1218.6855 | 1218.6794 | 5.01  | 1    | 22    | 0.042  | 1    | U      | K.AAVQKAIPMYK.I  |
| 62. | NRX3A_MOUSE Mass: 173318 Score: 22 Matches: 1(1) Sequences: 1(1) emPAI: 0.03<br>Neurexin-3 OS=Mus musculus GN=Nrxn3 PE=1 SV=2                           |          |           |           |       |      |       |        |      |        |                  |
|     | Query                                                                                                                                                   | Observed | Mr(expt)  | Mr(calc)  | ppm   | Miss | Score | Expect | Rank | Unique | Peptide          |
|     | 155                                                                                                                                                     | 403.2320 | 804.4494  | 804.4415  | 9.76  | 0    | 22    | 0.048  | 1    | U      | K.GLMLDLK.Y      |
| 63. | SPI1_MOUSE Mass: 31329 Score: 22 Matches: 1(1) Sequences: 1(1) emPAI: 0.14<br>Transcription factor PU.1 OS=Mus musculus GN=Spi1 PE=1 SV=2               |          |           |           |       |      |       |        |      |        |                  |
|     | Query                                                                                                                                                   | Observed | Mr(expt)  | Mr(calc)  | ppm   | Miss | Score | Expect | Rank | Unique | Peptide          |
|     | 436                                                                                                                                                     | 463.7564 | 925.4982  | 925.5055  | -7.87 | 2    | 22    | 0.043  | 1    | U      | R.KKMTYQK.M      |
| 64. | MALD2_MOUSE Mass: 63622 Score: 22 Matches: 1(1) Sequences: 1(1) emPAI: 0.07<br>MARVEL domain-containing protein 2 OS=Mus musculus GN=Marveld2 PE=1 SV=1 |          |           |           |       |      |       |        |      |        |                  |
|     | Query                                                                                                                                                   | Observed | Mr(expt)  | Mr(calc)  | ppm   | Miss | Score | Expect | Rank | Unique | Peptide          |
|     | 316                                                                                                                                                     | 441.2654 | 880.5162  | 880.5243  | -9.15 | 1    | 22    | 0.035  | 1    | U      | K.LSHIKQR.I      |
| 65. | P_MOUSE Mass: 91810 Score: 21 Matches: 1(1) Sequences: 1(1) emPAI: 0.05<br>P protein OS=Mus musculus GN=Oca2 PE=1 SV=1                                  |          |           |           |       |      |       |        |      |        |                  |
|     | Query                                                                                                                                                   | Observed | Mr(expt)  | Mr(calc)  | ppm   | Miss | Score | Expect | Rank | Unique | Peptide          |
|     | 2582                                                                                                                                                    | 667.8862 | 1333.7578 | 1333.7605 | -2.06 | 0    | 21    | 0.031  | 1    | U      | R.LLTVKPATSNYK.L |
| 66. | NMT2_MOUSE Mass: 60446 Score: 21 Matches: 1(1) Sequences: 1(1) emPAI: 0.07                                                                              |          |           |           |       |      |       |        |      |        |                  |

|     |                                                                                                                                                    |          |           |           |       |      |       |        |      |        |                 |
|-----|----------------------------------------------------------------------------------------------------------------------------------------------------|----------|-----------|-----------|-------|------|-------|--------|------|--------|-----------------|
|     | Glycylpeptide N-tetradecanoyltransferase 2 OS=Mus musculus GN=Nmt2 PE=1 SV=1                                                                       |          |           |           |       |      |       |        |      |        |                 |
|     | Query                                                                                                                                              | Observed | Mr(expt)  | Mr(calc)  | ppm   | Miss | Score | Expect | Rank | Unique | Peptide         |
|     | 2539                                                                                                                                               | 666.4000 | 1330.7855 | 1330.7972 | -8.82 | 1    | 21    | 0.021  | 1    | U      | K.AVRELINIYLK.Q |
| 67. | UIMC1_MOUSE Mass: 81427 Score: 21 Matches: 1(1) Sequences: 1(1) emPAI: 0.05<br>BRCA1-A complex subunit RAP80 OS=Mus musculus GN=Uimc1 PE=1 SV=2    |          |           |           |       |      |       |        |      |        |                 |
|     | Query                                                                                                                                              | Observed | Mr(expt)  | Mr(calc)  | ppm   | Miss | Score | Expect | Rank | Unique | Peptide         |
|     | 1022                                                                                                                                               | 536.2663 | 1070.5180 | 1070.5252 | -6.72 | 2    | 21    | 0.045  | 1    | U      | R.KEKCYLCK.S    |
| 68. | MYOM1_MOUSE Mass: 185349 Score: 21 Matches: 1(1) Sequences: 1(1) emPAI: 0.02<br>Myomesin-1 OS=Mus musculus GN=Myom1 PE=1 SV=2                      |          |           |           |       |      |       |        |      |        |                 |
|     | Query                                                                                                                                              | Observed | Mr(expt)  | Mr(calc)  | ppm   | Miss | Score | Expect | Rank | Unique | Peptide         |
|     | 44                                                                                                                                                 | 365.7083 | 729.4021  | 729.4021  | -0.00 | 0    | 21    | 0.024  | 1    | U      | K.QAAIAEK.N     |
| 69. | HYAS3_MOUSE Mass: 63307 Score: 20 Matches: 1(1) Sequences: 1(1) emPAI: 0.07<br>Hyaluronan synthase 3 OS=Mus musculus GN=Has3 PE=1 SV=2             |          |           |           |       |      |       |        |      |        |                 |
|     | Query                                                                                                                                              | Observed | Mr(expt)  | Mr(calc)  | ppm   | Miss | Score | Expect | Rank | Unique | Peptide         |
|     | 168                                                                                                                                                | 404.1926 | 806.3707  | 806.3671  | 4.44  | 0    | 20    | 0.039  | 1    | U      | K.SGWGTSGR.K    |
| 70. | LAMC2_MOUSE Mass: 130077 Score: 20 Matches: 1(1) Sequences: 1(1) emPAI: 0.03<br>Laminin subunit gamma-2 OS=Mus musculus GN=Lamc2 PE=1 SV=2         |          |           |           |       |      |       |        |      |        |                 |
|     | Query                                                                                                                                              | Observed | Mr(expt)  | Mr(calc)  | ppm   | Miss | Score | Expect | Rank | Unique | Peptide         |
|     | 402                                                                                                                                                | 457.2949 | 912.5752  | 912.5756  | -0.50 | 0    | 20    | 0.016  | 1    | U      | R.NLTALLIR.A    |
| 71. | KIF27_MOUSE Mass: 158858 Score: 20 Matches: 1(1) Sequences: 1(1) emPAI: 0.03<br>Kinesin-like protein KIF27 OS=Mus musculus GN=Kif27 PE=1 SV=1      |          |           |           |       |      |       |        |      |        |                 |
|     | Query                                                                                                                                              | Observed | Mr(expt)  | Mr(calc)  | ppm   | Miss | Score | Expect | Rank | Unique | Peptide         |
|     | 22                                                                                                                                                 | 360.6764 | 719.3383  | 719.3385  | -0.23 | 0    | 20    | 0.013  | 1    | U      | R.CSLGAGGR.S    |
| 72. | PD1L1_MOUSE Mass: 32760 Score: 19 Matches: 2(2) Sequences: 1(1) emPAI: 0.14<br>Programmed cell death 1 ligand 1 OS=Mus musculus GN=Cd274 PE=1 SV=1 |          |           |           |       |      |       |        |      |        |                 |
|     | Query                                                                                                                                              | Observed | Mr(expt)  | Mr(calc)  | ppm   | Miss | Score | Expect | Rank | Unique | Peptide         |
|     | 36                                                                                                                                                 | 364.7243 | 727.4340  | 727.4341  | -0.09 | 1    | 18    | 0.031  | 1    | U      | R.GRASLPK.D 40  |

|     |                                                                             |          |           |           |       |      |       |        |      |        |               |
|-----|-----------------------------------------------------------------------------|----------|-----------|-----------|-------|------|-------|--------|------|--------|---------------|
| 73. | ACLY_MOUSE Mass: 119651 Score: 18 Matches: 1(1) Sequences: 1(1) emPAI: 0.04 |          |           |           |       |      |       |        |      |        |               |
|     | ATP-citrate synthase OS=Mus musculus GN=Acly PE=1 SV=1                      |          |           |           |       |      |       |        |      |        |               |
|     | Query                                                                       | Observed | Mr(expt)  | Mr(calc)  | ppm   | Miss | Score | Expect | Rank | Unique | Peptide       |
|     | 1089                                                                        | 545.3365 | 1088.6585 | 1088.6594 | -0.76 | 1    | 18    | 0.035  | 1    | U      | R.VQILKDFVK.Q |
| 74. | JPH1_MOUSE Mass: 71860 Score: 18 Matches: 1(1) Sequences: 1(1) emPAI: 0.06  |          |           |           |       |      |       |        |      |        |               |
|     | Junctophilin-1 OS=Mus musculus GN=Jph1 PE=1 SV=1                            |          |           |           |       |      |       |        |      |        |               |
|     | Query                                                                       | Observed | Mr(expt)  | Mr(calc)  | ppm   | Miss | Score | Expect | Rank | Unique | Peptide       |
|     | 85                                                                          | 378.7218 | 755.4290  | 755.4290  | 0.00  | 1    | 18    | 0.024  | 1    | U      | R.KGTTPPR.S   |

**Biotin-TPL pulldown Band #5**

1. PSD10\_MOUSE Mass: 25068 Score: 11406 Matches: 478(478) Sequences: 4(4) emPAI: 2.25

26S proteasome non-ATPase regulatory subunit 10 OS=Mus musculus GN=Psm10 PE=1 SV=3

| Query | Observed | Mr(expt)  | Mr(calc)  | ppm   | Miss | Score | Expect   | Rank | Unique | Peptide                                                                                                                                                                                                                                                                                                                                                                                    |
|-------|----------|-----------|-----------|-------|------|-------|----------|------|--------|--------------------------------------------------------------------------------------------------------------------------------------------------------------------------------------------------------------------------------------------------------------------------------------------------------------------------------------------------------------------------------------------|
| 1551  | 388.5595 | 1162.6567 | 1162.6573 | -0.48 | 0    | (50)  | 7.2e-005 | 1    | U      | K.MVHILLFYK.A 1514 1516 1517 1522 1523 1529 1536 1537 1539 1541 1542 1543 1544 1546 1547 1548 1550 1552 1559 1561 1566 1567 1568 1571 1572 1575 1582 1583 1586 1587 1588 1591 1593 1598 1601 1602 1607 1610 1611 1612 1613 1614 1616 1617 1621 1623 1625 1627 1628 1629 1630 1632 1633 1634 1635 1636 1645 1646 1648 1649 1658 1659 1666 1669 1675 1676 1678 1679 1680 1681 1686 1687 1691 |
| 1654  | 582.3361 | 1162.6576 | 1162.6573 | 0.27  | 0    | 61    | 4.2e-006 | 1    | U      | K.MVHILLFYK.A 1513 1515 1518 1519 1525 1530 1531 1532 1533 1555 1556 1557 1558 1563 1564 1565 1578 1579 1580 1596 1608 1619 1620 1642 1653 1655 1656 1657 1660 1661 1662 1663 1664 1672 1673 1683 1685 1688 1689 1692 1693                                                                                                                                                                 |
| 1818  | 590.3333 | 1178.6519 | 1178.6522 | -0.19 | 0    | (53)  | 3.5e-005 | 1    | U      | K.MVHILLFYK.A 1816                                                                                                                                                                                                                                                                                                                                                                         |
| 1822  | 393.8914 | 1178.6524 | 1178.6522 | 0.22  | 0    | (30)  | 0.007    | 1    | U      | K.MVHILLFYK.A 1810 1819 1820 1821 1823                                                                                                                                                                                                                                                                                                                                                     |

|  |      |          |           |           |       |   |      |          |   |   |                                                                                                                                                                                                                                                                                                     |
|--|------|----------|-----------|-----------|-------|---|------|----------|---|---|-----------------------------------------------------------------------------------------------------------------------------------------------------------------------------------------------------------------------------------------------------------------------------------------------------|
|  | 2077 | 406.1768 | 1215.5085 | 1215.5091 | -0.53 | 0 | (61) | 2.2e-006 | 1 | U | K.DHYDATAMHR.A 2070 2071<br>2072 2073 2074 2076 2081 2082<br>2083 2085 2086 2089 2090 209<br>1 2092 2095 2096 2097 2098 21<br>00 2101 2102 2103 2104 2105 2<br>106 2107 2109 2110 2111 2112<br>2113 2117 2118 2119 2120 2122<br>2123 2124 2126 2127 2129 213<br>0 2131 2132 2133 2134 2137 21<br>38 |
|  | 2078 | 608.7615 | 1215.5085 | 1215.5091 | -0.47 | 0 | 67   | 5.9e-007 | 1 | U | K.DHYDATAMHR.A 2079 2087<br>2099 2114 2115 2116 2121 2128<br>2135 2136                                                                                                                                                                                                                              |
|  | 2267 | 616.7592 | 1231.5039 | 1231.5040 | -0.10 | 0 | (55) | 9.6e-006 | 1 | U | K.DHYDATAMHR.A 2249 2252<br>2266 2281 2282                                                                                                                                                                                                                                                          |
|  | 2285 | 411.5090 | 1231.5053 | 1231.5040 | 1.01  | 0 | (44) | 0.00012  | 1 | U | K.DHYDATAMHR.A 2253 2254<br>2257 2258 2259 2262 2264 2265<br>2268 2269 2271 2272 2273 227<br>4 2275 2277 2283                                                                                                                                                                                       |
|  | 4248 | 528.2873 | 1581.8402 | 1581.8402 | -0.01 | 0 | (53) | 4.9e-005 | 1 | U | K.FLVTQGASIYIENK.E 4178 41<br>80 4190 4223 4224 4231 4247 4<br>252 4270 4271 4285 4286 4307<br>4308                                                                                                                                                                                                 |

|  |      |          |           |           |      |   |     |          |   |   |                                                                                                                                                                                                                                                                                                                                                                                                                                                                                                                                                               |
|--|------|----------|-----------|-----------|------|---|-----|----------|---|---|---------------------------------------------------------------------------------------------------------------------------------------------------------------------------------------------------------------------------------------------------------------------------------------------------------------------------------------------------------------------------------------------------------------------------------------------------------------------------------------------------------------------------------------------------------------|
|  | 4260 | 791.9275 | 1581.8404 | 1581.8402 | 0.12 | 0 | 109 | 1.2e-010 | 1 | U | K.FLVTQGASIYIENK.E 4176 41<br>81 4182 4183 4185 4186 4187 4<br>188 4189 4191 4192 4193 4194<br>4195 4196 4197 4198 4200 4202<br>4203 4204 4205 4206 4208 420<br>9 4210 4211 4212 4213 4214 42<br>16 4217 4218 4219 4220 4221 4<br>222 4227 4228 4229 4230 4232<br>4233 4234 4235 4236 4237 4238<br>4239 4240 4241 4242 4243 424<br>4 4245 4249 4250 4251 4253 42<br>54 4256 4257 4258 4259 4262 4<br>265 4266 4267 4268 4272 4274<br>4275 4276 4277 4279 4280 4281<br>4282 4283 4287 4289 4290 429<br>2 4293 4294 4295 4297 4302 43<br>04 4306 4309 4310 4311 |
|--|------|----------|-----------|-----------|------|---|-----|----------|---|---|---------------------------------------------------------------------------------------------------------------------------------------------------------------------------------------------------------------------------------------------------------------------------------------------------------------------------------------------------------------------------------------------------------------------------------------------------------------------------------------------------------------------------------------------------------------|

|  |      |          |           |           |       |   |       |          |   |   |                                                                                                                                                                                                                                                                                                                                                                                                                                                                                                                                                                                                                                                                                                                      |
|--|------|----------|-----------|-----------|-------|---|-------|----------|---|---|----------------------------------------------------------------------------------------------------------------------------------------------------------------------------------------------------------------------------------------------------------------------------------------------------------------------------------------------------------------------------------------------------------------------------------------------------------------------------------------------------------------------------------------------------------------------------------------------------------------------------------------------------------------------------------------------------------------------|
|  | 4925 | 588.9695 | 1763.8866 | 1763.8876 | -0.55 | 0 | (69)  | 1.8e-006 | 1 | U | R.HEIAVMLLEGGANPDAK.D 49<br>02 4903 4904 4906 4907 4910 4<br>911 4914 4915 4916 4917 4919<br>4920 4921 4922 4923 4924 4926<br>4930 4931 4932 4933 4934 493<br>5 4936 4937 4938 4939 4940 49<br>41 4942 4945 4946 4947 4948 4<br>949 4950 4951 4952 4953 4956<br>4957 4958 4959 4960 4961 4962<br>4967 4968 4969 4970 4971 497<br>3 4974 4975 4976 4978 4979 49<br>80 4981 4982 4983 4985 4986 4<br>987 4990 4991 4992 4993 4994<br>4995 4996 4997 4999 5000 5002<br>5003 5004 5005 5006 5007 500<br>8 5009 5012 5013 5014 5015 50<br>16 5017 5018 5019 5020 5022 5<br>023 5024 5025 5026 5027 5028<br>5029 5030 5033 5034 5035 5036<br>5037 5038 5039 5042 5043 504<br>4 5045 5046 5047 5048 5050 50<br>51 5052 5053 |
|  | 4943 | 882.9507 | 1763.8868 | 1763.8876 | -0.44 | 0 | 150   | 1.5e-014 | 1 | U | R.HEIAVMLLEGGANPDAK.D 49<br>01 4909 4912 4913 4927 4929 4<br>944 4954 4955 4963 4965 4966<br>4989 5011 5021 5041                                                                                                                                                                                                                                                                                                                                                                                                                                                                                                                                                                                                     |
|  | 4964 | 441.9791 | 1763.8873 | 1763.8876 | -0.17 | 0 | (49)  | 0.00022  | 1 | U | R.HEIAVMLLEGGANPDAK.D 50<br>40                                                                                                                                                                                                                                                                                                                                                                                                                                                                                                                                                                                                                                                                                       |
|  | 5107 | 890.9486 | 1779.8827 | 1779.8825 | 0.09  | 0 | (137) | 3e-013   | 1 | U | R.HEIAVMLLEGGANPDAK.D 50<br>99 5102 5106 5109 5112 5113                                                                                                                                                                                                                                                                                                                                                                                                                                                                                                                                                                                                                                                              |
|  | 5114 | 594.3018 | 1779.8835 | 1779.8825 | 0.53  | 0 | (74)  | 5.7e-007 | 1 | U | R.HEIAVMLLEGGANPDAK.D 50<br>95 5096 5097 5098 5100 5101 5<br>103 5104 5108 5110 5111 5115<br>5116                                                                                                                                                                                                                                                                                                                                                                                                                                                                                                                                                                                                                    |

|    |                                                                                                                                                                        |          |           |           |       |      |       |          |      |        |                       |
|----|------------------------------------------------------------------------------------------------------------------------------------------------------------------------|----------|-----------|-----------|-------|------|-------|----------|------|--------|-----------------------|
| 2. | LIN41_MOUSE Mass: 91996 Score: 77 Matches: 2(2) Sequences: 2(2) emPAI: 0.10<br>E3 ubiquitin-protein ligase TRIM71 OS=Mus musculus GN=Trim71 PE=1 SV=1                  |          |           |           |       |      |       |          |      |        |                       |
|    | Query                                                                                                                                                                  | Observed | Mr(expt)  | Mr(calc)  | ppm   | Miss | Score | Expect   | Rank | Unique | Peptide               |
|    | 2413                                                                                                                                                                   | 624.8510 | 1247.6875 | 1247.6874 | 0.08  | 0    | 72    | 5.3e-007 | 1    | U      | R.LPAPGGAGPAEALK.L    |
|    | 4559                                                                                                                                                                   | 550.8879 | 1649.6420 | 1649.6418 | 0.09  | 0    | 22    | 0.0093   | 1    | U      | R.CLDCQEHLCDNCVR.A    |
| 3. | MED1_MOUSE Mass: 167036 Score: 59 Matches: 1(1) Sequences: 1(1) emPAI: 0.03<br>Mediator of RNA polymerase II transcription subunit 1 OS=Mus musculus GN=Med1 PE=1 SV=2 |          |           |           |       |      |       |          |      |        |                       |
|    | Query                                                                                                                                                                  | Observed | Mr(expt)  | Mr(calc)  | ppm   | Miss | Score | Expect   | Rank | Unique | Peptide               |
|    | 4512                                                                                                                                                                   | 819.9240 | 1637.8335 | 1637.8334 | 0.03  | 0    | 59    | 1.6e-005 | 1    | U      | K.MYLALQSLEQDLSK.M    |
| 4. | VP13C_MOUSE Mass: 419824 Score: 36 Matches: 2(2) Sequences: 1(1) emPAI: 0.01<br>Vacuolar protein sorting-associated protein 13C OS=Mus musculus GN=Vps13c PE=1 SV=2    |          |           |           |       |      |       |          |      |        |                       |
|    | Query                                                                                                                                                                  | Observed | Mr(expt)  | Mr(calc)  | ppm   | Miss | Score | Expect   | Rank | Unique | Peptide               |
|    | 2028                                                                                                                                                                   | 604.8301 | 1207.6457 | 1207.6448 | 0.75  | 2    | 35    | 0.0031   | 1    | U      | K.EAKKDTFLEK.L 2026   |
| 5. | KNTC1_MOUSE Mass: 250198 Score: 29 Matches: 1(1) Sequences: 1(1) emPAI: 0.02<br>Kinetochores-associated protein 1 OS=Mus musculus GN=Kntc1 PE=1 SV=2                   |          |           |           |       |      |       |          |      |        |                       |
|    | Query                                                                                                                                                                  | Observed | Mr(expt)  | Mr(calc)  | ppm   | Miss | Score | Expect   | Rank | Unique | Peptide               |
|    | 4355                                                                                                                                                                   | 797.9270 | 1593.8394 | 1593.8436 | -2.61 | 1    | 29    | 0.012    | 1    | U      | K.EMSLKNFVGTDIK.G     |
| 6. | KSYK_MOUSE Mass: 71331 Score: 26 Matches: 1(1) Sequences: 1(1) emPAI: 0.06<br>Tyrosine-protein kinase SYK OS=Mus musculus GN=Syk PE=1 SV=2                             |          |           |           |       |      |       |          |      |        |                       |
|    | Query                                                                                                                                                                  | Observed | Mr(expt)  | Mr(calc)  | ppm   | Miss | Score | Expect   | Rank | Unique | Peptide               |
|    | 559                                                                                                                                                                    | 486.2433 | 970.4720  | 970.4719  | 0.09  | 0    | 26    | 0.015    | 1    | U      | K.NEANDPALK.D         |
| 7. | NHRF1_MOUSE Mass: 38577 Score: 26 Matches: 1(1) Sequences: 1(1) emPAI: 0.12<br>Na(+)/H(+) exchange regulatory cofactor NHE-RF1 OS=Mus musculus GN=Slc9a3r1 PE=1 SV=3   |          |           |           |       |      |       |          |      |        |                       |
|    | Query                                                                                                                                                                  | Observed | Mr(expt)  | Mr(calc)  | ppm   | Miss | Score | Expect   | Rank | Unique | Peptide               |
|    | 4627                                                                                                                                                                   | 556.6187 | 1666.8341 | 1666.8275 | 3.99  | 1    | 26    | 0.032    | 1    | U      | K.QHGDVVSAIKGGGDEAK.L |
| 8. | ATG2B_MOUSE Mass: 231253 Score: 26 Matches: 1(1) Sequences: 1(1) emPAI: 0.02<br>Autophagy-related protein 2 homolog B OS=Mus musculus GN=Atg2b PE=1 SV=3               |          |           |           |       |      |       |          |      |        |                       |
|    | Query                                                                                                                                                                  | Observed | Mr(expt)  | Mr(calc)  | ppm   | Miss | Score | Expect   | Rank | Unique | Peptide               |
|    | 826                                                                                                                                                                    | 526.7756 | 1051.5366 | 1051.5298 | 6.46  | 0    | 26    | 0.029    | 1    | U      | R.IEHVPENSK.T         |



|     |                                                                                           |              |           |               |                 |             |       |        |      |        |                |  |
|-----|-------------------------------------------------------------------------------------------|--------------|-----------|---------------|-----------------|-------------|-------|--------|------|--------|----------------|--|
| 9.  | WRN_MOUSE                                                                                 | Mass: 157104 | Score: 25 | Matches: 1(1) | Sequences: 1(1) | emPAI: 0.03 |       |        |      |        |                |  |
|     | Werner syndrome ATP-dependent helicase homolog OS=Mus musculus GN=Wrn PE=1 SV=3           |              |           |               |                 |             |       |        |      |        |                |  |
|     | Query                                                                                     | Observed     | Mr(expt)  | Mr(calc)      | ppm             | Miss        | Score | Expect | Rank | Unique | Peptide        |  |
|     | 1038                                                                                      | 546.3085     | 1090.6025 | 1090.6056     | -2.83           | 1           | 25    | 0.023  | 1    | U      | K.MLLENKSIK.K  |  |
| 10. | KDM5B_MOUSE                                                                               | Mass: 175442 | Score: 23 | Matches: 1(1) | Sequences: 1(1) | emPAI: 0.02 |       |        |      |        |                |  |
|     | Lysine-specific demethylase 5B OS=Mus musculus GN=Kdm5b PE=1 SV=1                         |              |           |               |                 |             |       |        |      |        |                |  |
|     | Query                                                                                     | Observed     | Mr(expt)  | Mr(calc)      | ppm             | Miss        | Score | Expect | Rank | Unique | Peptide        |  |
|     | 1321                                                                                      | 568.3091     | 1134.6036 | 1134.6067     | -2.70           | 1           | 23    | 0.05   | 1    | U      | R.CDIGLLGLKR.K |  |
| 11. | SMC2_MOUSE                                                                                | Mass: 134156 | Score: 23 | Matches: 1(1) | Sequences: 1(1) | emPAI: 0.03 |       |        |      |        |                |  |
|     | Structural maintenance of chromosomes protein 2 OS=Mus musculus GN=Smc2 PE=1 SV=2         |              |           |               |                 |             |       |        |      |        |                |  |
|     | Query                                                                                     | Observed     | Mr(expt)  | Mr(calc)      | ppm             | Miss        | Score | Expect | Rank | Unique | Peptide        |  |
|     | 2965                                                                                      | 662.3249     | 1322.6353 | 1322.6353     | 0.00            | 1           | 23    | 0.049  | 1    | U      | K.AEEKYEALNK.M |  |
| 12. | PCLO_MOUSE                                                                                | Mass: 550496 | Score: 22 | Matches: 1(1) | Sequences: 1(1) | emPAI: 0.01 |       |        |      |        |                |  |
|     | Protein piccolo OS=Mus musculus GN=Pclo PE=1 SV=4                                         |              |           |               |                 |             |       |        |      |        |                |  |
|     | Query                                                                                     | Observed     | Mr(expt)  | Mr(calc)      | ppm             | Miss        | Score | Expect | Rank | Unique | Peptide        |  |
|     | 589                                                                                       | 492.7589     | 983.5033  | 983.5036      | -0.34           | 0           | 22    | 0.04   | 1    | U      | K.SPAQQPGTAK.L |  |
| 13. | SYT1_MOUSE                                                                                | Mass: 47388  | Score: 22 | Matches: 1(1) | Sequences: 1(1) | emPAI: 0.09 |       |        |      |        |                |  |
|     | Synaptotagmin-1 OS=Mus musculus GN=Syt1 PE=1 SV=1                                         |              |           |               |                 |             |       |        |      |        |                |  |
|     | Query                                                                                     | Observed     | Mr(expt)  | Mr(calc)      | ppm             | Miss        | Score | Expect | Rank | Unique | Peptide        |  |
|     | 35                                                                                        | 368.2055     | 734.3964  | 734.3963      | 0.14            | 0           | 22    | 0.014  | 1    | U      | R.YVPTAGK.L    |  |
| 14. | BRNP2_MOUSE                                                                               | Mass: 89171  | Score: 22 | Matches: 1(1) | Sequences: 1(1) | emPAI: 0.05 |       |        |      |        |                |  |
|     | BMP/retinoic acid-inducible neural-specific protein 2 OS=Mus musculus GN=Brinp2 PE=1 SV=1 |              |           |               |                 |             |       |        |      |        |                |  |
|     | Query                                                                                     | Observed     | Mr(expt)  | Mr(calc)      | ppm             | Miss        | Score | Expect | Rank | Unique | Peptide        |  |
|     | 888                                                                                       | 532.3108     | 1062.6071 | 1062.6107     | -3.33           | 1           | 22    | 0.032  | 1    | U      | R.MLLTLKSNK.Y  |  |
| 15. | GRM2_MOUSE                                                                                | Mass: 95826  | Score: 19 | Matches: 1(1) | Sequences: 1(1) | emPAI: 0.05 |       |        |      |        |                |  |
|     | Metabotropic glutamate receptor 2 OS=Mus musculus GN=Grm2 PE=1 SV=2                       |              |           |               |                 |             |       |        |      |        |                |  |
|     | Query                                                                                     | Observed     | Mr(expt)  | Mr(calc)      | ppm             | Miss        | Score | Expect | Rank | Unique | Peptide        |  |
|     | 136                                                                                       | 400.2190     | 798.4235  | 798.4236      | -0.08           | 0           | 19    | 0.033  | 1    | U      | R.GAVAEHPAK.K  |  |

|     |                                                                                   |          |           |           |       |      |       |        |      |        |                |
|-----|-----------------------------------------------------------------------------------|----------|-----------|-----------|-------|------|-------|--------|------|--------|----------------|
| 16. | TRI50_MOUSE Mass: 54573 Score: 19 Matches: 1(1) Sequences: 1(1) emPAI: 0.08       |          |           |           |       |      |       |        |      |        |                |
|     | E3 ubiquitin-protein ligase TRIM50 OS=Mus musculus GN=Trim50 PE=2 SV=1            |          |           |           |       |      |       |        |      |        |                |
|     | Query                                                                             | Observed | Mr(expt)  | Mr(calc)  | ppm   | Miss | Score | Expect | Rank | Unique | Peptide        |
|     | 295                                                                               | 448.2860 | 894.5575  | 894.5538  | 4.06  | 0    | 19    | 0.016  | 1    | U      | K.VLPAPASLK.L  |
| 17. | TOPB1_MOUSE Mass: 168754 Score: 18 Matches: 1(1) Sequences: 1(1) emPAI: 0.03      |          |           |           |       |      |       |        |      |        |                |
|     | DNA topoisomerase 2-binding protein 1 OS=Mus musculus GN=Topbp1 PE=1 SV=2         |          |           |           |       |      |       |        |      |        |                |
|     | Query                                                                             | Observed | Mr(expt)  | Mr(calc)  | ppm   | Miss | Score | Expect | Rank | Unique | Peptide        |
|     | 2194                                                                              | 610.7476 | 1219.4806 | 1219.4816 | -0.81 | 0    | 18    | 0.021  | 1    | U      | K.SSDNSECFFK.A |
| 18. | TR150_MOUSE Mass: 108114 Score: 14 Matches: 1(1) Sequences: 1(1) emPAI: 0.04      |          |           |           |       |      |       |        |      |        |                |
|     | Thyroid hormone receptor-associated protein 3 OS=Mus musculus GN=Thrap3 PE=1 SV=1 |          |           |           |       |      |       |        |      |        |                |
|     | Query                                                                             | Observed | Mr(expt)  | Mr(calc)  | ppm   | Miss | Score | Expect | Rank | Unique | Peptide        |
|     | 86                                                                                | 387.6819 | 773.3492  | 773.3416  | 9.82  | 0    | 14    | 0.047  | 1    | U      | R.SSSNHSR.V    |
| 19. | ARI2_MOUSE Mass: 57659 Score: 14 Matches: 1(1) Sequences: 1(1) emPAI: 0.08        |          |           |           |       |      |       |        |      |        |                |
|     | E3 ubiquitin-protein ligase ARIH2 OS=Mus musculus GN=Arih2 PE=1 SV=1              |          |           |           |       |      |       |        |      |        |                |
|     | Query                                                                             | Observed | Mr(expt)  | Mr(calc)  | ppm   | Miss | Score | Expect | Rank | Unique | Peptide        |
|     | 29                                                                                | 364.2084 | 726.4022  | 726.4024  | -0.34 | 0    | 14    | 0.038  | 1    | U      | K.VSHSVAK.L    |

**Biotin-TPL pulldown Band #6**

1. DCTP1\_MOUSE Mass: 18783 Score: 14079 Matches: 428(428) Sequences: 4(4) emPAI: 4.98

dCTP pyrophosphatase 1 OS=Mus musculus GN=Dctpp1 PE=1 SV=1

| Query | Observed | Mr(expt)  | Mr(calc)  | ppm   | Miss | Score | Expect   | Rank | Unique | Peptide                                                                                                                                                                                                            |
|-------|----------|-----------|-----------|-------|------|-------|----------|------|--------|--------------------------------------------------------------------------------------------------------------------------------------------------------------------------------------------------------------------|
| 1262  | 605.7973 | 1209.5800 | 1209.5812 | -0.95 | 1    | 87    | 1.9e-008 | 1    | U      | R.GSACKYTDLPR.G 1257 1261 1272 1276 1277 1282 1283 1298 1299 1302 1303 1304 1308 1319 1324 1339 1340 1342 1344 1349 1350 1352                                                                                      |
| 1265  | 404.2007 | 1209.5801 | 1209.5812 | -0.88 | 1    | (45)  | 0.00036  | 1    | U      | R.GSACKYTDLPR.G 1258 1259 1263 1264 1269 1270 1271 1273 1274 1275 1281 1285 1286 1287 1288 1290 1292 1293 1294 1295 1301 1306 1307 1309 1310 1313 1314 1315 1316 1317 1321 1322 1331 1333 1334 1335 1337 1341 1343 |
| 1630  | 420.1957 | 1257.5652 | 1257.5659 | -0.57 | 1    | (33)  | 0.0031   | 1    | U      | R.GSACKYTDLPR.G                                                                                                                                                                                                    |
| 1633  | 629.7901 | 1257.5656 | 1257.5659 | -0.23 | 1    | (60)  | 7.5e-006 | 1    | U      | R.GSACKYTDLPR.G 1631 1632 1634 1636                                                                                                                                                                                |
| 1707  | 634.3080 | 1266.6015 | 1266.6027 | -0.89 | 1    | (26)  | 0.029    | 1    | U      | R.GSACKYTDLPR.G                                                                                                                                                                                                    |
| 1711  | 423.2079 | 1266.6019 | 1266.6027 | -0.58 | 1    | (28)  | 0.018    | 1    | U      | R.GSACKYTDLPR.G                                                                                                                                                                                                    |



|  |      |          |           |           |       |   |      |          |   |   |                                                                                                                                                                                                                                                                                                                                                                                                                                                                                                                                                                                                                                                                                                                                                                                                                                                                                                                                                                                                                       |
|--|------|----------|-----------|-----------|-------|---|------|----------|---|---|-----------------------------------------------------------------------------------------------------------------------------------------------------------------------------------------------------------------------------------------------------------------------------------------------------------------------------------------------------------------------------------------------------------------------------------------------------------------------------------------------------------------------------------------------------------------------------------------------------------------------------------------------------------------------------------------------------------------------------------------------------------------------------------------------------------------------------------------------------------------------------------------------------------------------------------------------------------------------------------------------------------------------|
|  |      |          |           |           |       |   |      |          |   |   | R.CHVDLPQAVISK.M 1964 1966<br>1968 1971 1972 1973 1974 1986 1<br>987 1988 1989 1990 1999 2000 20<br>01 2002 2003 2004 2023 2024 202<br>5 2026 2027 2028 2029 2030 2031<br>2032 2033 2034 2035 2046 2047 2<br>048 2049 2050 2051 2052 2053 20<br>54 2055 2056 2057 2058 2064 206<br>5 2066 2067 2068 2069 2070 2071<br>2072 2073 2074 2076 2077 2078 2<br>106 2107 2108 2109 2110 2111 21<br>12 2113 2114 2115 2116 2117 211<br>8 2119 2120 2121 2122 2123 2124<br>2125 2126 2138 2139 2140 2141 2<br>142 2143 2144 2145 2146 2147 21<br>48 2149 2150 2151 2152 2153 215<br>4 2155 2156 2157 2158 2171 2172<br>2173 2174 2175 2176 2177 2178 2<br>179 2180 2181 2182 2183 2184 21<br>85 2186 2187 2188 2189 2190 219<br>1 2204 2205 2206 2207 2208 2209<br>2210 2211 2212 2213 2214 2215 2<br>216 2217 2218 2230 2231 2232 22<br>33 2234 2242 2243 2244 2245 224<br>6 2247 2248 2249 2250 2251 2252<br>2258 2259 2260 2261 2262 2263 2<br>264 2266 2267 2268 2269 2270 22<br>71 2275 2276 2277 2278 2282 228<br>3 2284 |
|  | 2075 | 655.3502 | 1308.6858 | 1308.6860 | -0.18 | 0 | (82) | 6.5e-008 | 1 | U |                                                                                                                                                                                                                                                                                                                                                                                                                                                                                                                                                                                                                                                                                                                                                                                                                                                                                                                                                                                                                       |
|  | 2603 | 679.3422 | 1356.6699 | 1356.6707 | -0.63 | 0 | 91   | 8.4e-009 | 1 | U | R.CHVDLPQAVISK.M 2604 2606<br>2608                                                                                                                                                                                                                                                                                                                                                                                                                                                                                                                                                                                                                                                                                                                                                                                                                                                                                                                                                                                    |
|  | 2672 | 683.8610 | 1365.7074 | 1365.7075 | -0.08 | 0 | (25) | 0.036    | 1 | U | R.CHVDLPQAVISK.M                                                                                                                                                                                                                                                                                                                                                                                                                                                                                                                                                                                                                                                                                                                                                                                                                                                                                                                                                                                                      |
|  | 2673 | 456.2431 | 1365.7075 | 1365.7075 | -0.00 | 0 | (28) | 0.015    | 1 | U | R.CHVDLPQAVISK.M 2671 2674                                                                                                                                                                                                                                                                                                                                                                                                                                                                                                                                                                                                                                                                                                                                                                                                                                                                                                                                                                                            |

|    |                                                                                                                                                                                 |          |           |           |       |      |       |          |      |        |                                                                |
|----|---------------------------------------------------------------------------------------------------------------------------------------------------------------------------------|----------|-----------|-----------|-------|------|-------|----------|------|--------|----------------------------------------------------------------|
|    | 2988                                                                                                                                                                            | 470.5613 | 1408.6621 | 1408.6623 | -0.13 | 0    | (54)  | 4.4e-005 | 1    | U      | K.SDTEPGPQAWPPK.E 2978 2981 2982 2984 2985 2989 2990 2996      |
|    | 2995                                                                                                                                                                            | 705.3385 | 1408.6624 | 1408.6623 | 0.11  | 0    | 92    | 7.3e-009 | 1    | U      | K.SDTEPGPQAWPPK.E 2977 2979 2980 2986 2987 2993 2994 2997 2998 |
|    | 4110                                                                                                                                                                            | 521.2617 | 1560.7633 | 1560.7645 | -0.73 | 0    | 50    | 0.00013  | 1    | U      | R.GTVGQEDSAAARPFR.F 4108 4109 4115 4118                        |
|    | 4113                                                                                                                                                                            | 781.3891 | 1560.7636 | 1560.7645 | -0.52 | 0    | (36)  | 0.0032   | 1    | U      | R.GTVGQEDSAAARPFR.F 4106 4107                                  |
| 2. | PSD10_MOUSE Mass: 25068 Score: 82 Matches: 5(5) Sequences: 3(3) emPAI: 0.66<br>26S proteasome non-ATPase regulatory subunit 10 OS=Mus musculus GN=Psm10 PE=1 SV=3               |          |           |           |       |      |       |          |      |        |                                                                |
|    | Query                                                                                                                                                                           | Observed | Mr(expt)  | Mr(calc)  | ppm   | Miss | Score | Expect   | Rank | Unique | Peptide                                                        |
|    | 1061                                                                                                                                                                            | 388.5598 | 1162.6576 | 1162.6573 | 0.30  | 0    | 25    | 0.014    | 1    | U      | K.MVHILLFYK.A 1060                                             |
|    | 1062                                                                                                                                                                            | 582.3361 | 1162.6577 | 1162.6573 | 0.37  | 0    | (23)  | 0.025    | 1    | U      | K.MVHILLFYK.A                                                  |
|    | 1393                                                                                                                                                                            | 406.1770 | 1215.5092 | 1215.5091 | 0.06  | 0    | 35    | 0.00083  | 1    | U      | K.DHYDATAMHR.A                                                 |
|    | 4712                                                                                                                                                                            | 588.9698 | 1763.8877 | 1763.8876 | 0.08  | 0    | 48    | 0.00025  | 1    | U      | R.HEIAVMLLEGGANPDAK.D                                          |
| 3. | ERCC3_MOUSE Mass: 89070 Score: 34 Matches: 1(1) Sequences: 1(1) emPAI: 0.05<br>TFIIH basal transcription factor complex helicase XPB subunit OS=Mus musculus GN=Ercc3 PE=2 SV=1 |          |           |           |       |      |       |          |      |        |                                                                |
|    | Query                                                                                                                                                                           | Observed | Mr(expt)  | Mr(calc)  | ppm   | Miss | Score | Expect   | Rank | Unique | Peptide                                                        |
|    | 4387                                                                                                                                                                            | 816.9244 | 1631.8342 | 1631.8341 | 0.05  | 0    | 34    | 0.005    | 1    | U      | R.CLVLGNSAVSVEQWK.A                                            |
| 4. | NEUA_MOUSE Mass: 48028 Score: 32 Matches: 3(3) Sequences: 1(1) emPAI: 0.09<br>N-acetylneuraminyltransferase OS=Mus musculus GN=Cmas PE=1 SV=2                                   |          |           |           |       |      |       |          |      |        |                                                                |
|    | Query                                                                                                                                                                           | Observed | Mr(expt)  | Mr(calc)  | ppm   | Miss | Score | Expect   | Rank | Unique | Peptide                                                        |
|    | 1778                                                                                                                                                                            | 638.8486 | 1275.6826 | 1275.6857 | -2.40 | 1    | 28    | 0.015    | 1    | U      | K.QTLSALKLDCK.T 1775 1777                                      |
| 5. | CG057_MOUSE Mass: 32875 Score: 28 Matches: 1(1) Sequences: 1(1) emPAI: 0.14<br>Uncharacterized protein C7orf57 homolog OS=Mus musculus GN=Gm11992 PE=1 SV=1                     |          |           |           |       |      |       |          |      |        |                                                                |
|    | Query                                                                                                                                                                           | Observed | Mr(expt)  | Mr(calc)  | ppm   | Miss | Score | Expect   | Rank | Unique | Peptide                                                        |
|    | 64                                                                                                                                                                              | 371.7265 | 741.4385  | 741.4385  | 0.06  | 0    | 28    | 0.0033   | 1    | U      | K.LPAINSK.N                                                    |
| 6. | LCA5_MOUSE Mass: 80113 Score: 27 Matches: 1(1) Sequences: 1(1) emPAI: 0.05                                                                                                      |          |           |           |       |      |       |          |      |        |                                                                |

|     |                                                                                                                                                                     |          |           |           |       |      |       |        |      |        |                 |
|-----|---------------------------------------------------------------------------------------------------------------------------------------------------------------------|----------|-----------|-----------|-------|------|-------|--------|------|--------|-----------------|
|     | Lebercilin OS=Mus musculus GN=Lca5 PE=1 SV=1                                                                                                                        |          |           |           |       |      |       |        |      |        |                 |
|     | Query                                                                                                                                                               | Observed | Mr(expt)  | Mr(calc)  | ppm   | Miss | Score | Expect | Rank | Unique | Peptide         |
|     | 84                                                                                                                                                                  | 378.7344 | 755.4543  | 755.4541  | 0.28  | 1    | 27    | 0.0026 | 1    | U      | R.LPKSSPK.K     |
| 7.  | SOCS6_MOUSE Mass: 59040 Score: 27 Matches: 1(1) Sequences: 1(1) emPAI: 0.07<br>Suppressor of cytokine signaling 6 OS=Mus musculus GN=Socs6 PE=1 SV=2                |          |           |           |       |      |       |        |      |        |                 |
|     | Query                                                                                                                                                               | Observed | Mr(expt)  | Mr(calc)  | ppm   | Miss | Score | Expect | Rank | Unique | Peptide         |
|     | 190                                                                                                                                                                 | 412.2394 | 822.4642  | 822.4599  | 5.20  | 1    | 27    | 0.0077 | 1    | U      | R.KSFNLSK.S     |
| 8.  | PLIN4_MOUSE Mass: 139328 Score: 26 Matches: 2(2) Sequences: 1(1) emPAI: 0.03<br>Perilipin-4 OS=Mus musculus GN=Plin4 PE=1 SV=2                                      |          |           |           |       |      |       |        |      |        |                 |
|     | Query                                                                                                                                                               | Observed | Mr(expt)  | Mr(calc)  | ppm   | Miss | Score | Expect | Rank | Unique | Peptide         |
|     | 82                                                                                                                                                                  | 373.6932 | 745.3719  | 745.3719  | 0.01  | 0    | 22    | 0.014  | 1    | U      | R.ASVAQDR.L 81  |
| 9.  | EST1A_MOUSE Mass: 160396 Score: 26 Matches: 1(1) Sequences: 1(1) emPAI: 0.03<br>Telomerase-binding protein EST1A OS=Mus musculus GN=Smg6 PE=1 SV=1                  |          |           |           |       |      |       |        |      |        |                 |
|     | Query                                                                                                                                                               | Observed | Mr(expt)  | Mr(calc)  | ppm   | Miss | Score | Expect | Rank | Unique | Peptide         |
|     | 1875                                                                                                                                                                | 646.8368 | 1291.6590 | 1291.6482 | 8.38  | 0    | 26    | 0.032  | 1    | U      | R.IGMETFPVAEK.V |
| 10. | PKRI1_MOUSE Mass: 21478 Score: 24 Matches: 1(1) Sequences: 1(1) emPAI: 0.22<br>PRKR-interacting protein 1 OS=Mus musculus GN=Prkrip1 PE=1 SV=2                      |          |           |           |       |      |       |        |      |        |                 |
|     | Query                                                                                                                                                               | Observed | Mr(expt)  | Mr(calc)  | ppm   | Miss | Score | Expect | Rank | Unique | Peptide         |
|     | 383                                                                                                                                                                 | 460.7658 | 919.5171  | 919.5161  | 1.10  | 2    | 24    | 0.037  | 1    | U      | K.KMKLEQK.K     |
| 11. | ZBT18_MOUSE Mass: 58348 Score: 23 Matches: 1(1) Sequences: 1(1) emPAI: 0.08<br>Zinc finger and BTB domain-containing protein 18 OS=Mus musculus GN=Zbtb18 PE=1 SV=1 |          |           |           |       |      |       |        |      |        |                 |
|     | Query                                                                                                                                                               | Observed | Mr(expt)  | Mr(calc)  | ppm   | Miss | Score | Expect | Rank | Unique | Peptide         |
|     | 122                                                                                                                                                                 | 392.7498 | 783.4850  | 783.4854  | -0.49 | 0    | 23    | 0.0075 | 1    | U      | K.LNILPSK.R     |
| 12. | SWP70_MOUSE Mass: 68953 Score: 23 Matches: 2(2) Sequences: 1(1) emPAI: 0.06<br>Switch-associated protein 70 OS=Mus musculus GN=Swap70 PE=1 SV=2                     |          |           |           |       |      |       |        |      |        |                 |
|     | Query                                                                                                                                                               | Observed | Mr(expt)  | Mr(calc)  | ppm   | Miss | Score | Expect | Rank | Unique | Peptide         |
|     | 73                                                                                                                                                                  | 372.2185 | 742.4225  | 742.4225  | 0.06  | 0    | 21    | 0.016  | 1    | U      | R.LIEPGSK.N 72  |

|     |                                                                                                |          |          |          |       |      |       |        |      |        |                     |
|-----|------------------------------------------------------------------------------------------------|----------|----------|----------|-------|------|-------|--------|------|--------|---------------------|
| 13. | SGPL1_MOUSE Mass: 63636 Score: 23 Matches: 1(1) Sequences: 1(1) emPAI: 0.07                    |          |          |          |       |      |       |        |      |        |                     |
|     | Sphingosine-1-phosphate lyase 1 OS=Mus musculus GN=Sgpl1 PE=1 SV=1                             |          |          |          |       |      |       |        |      |        |                     |
|     | Query                                                                                          | Observed | Mr(expt) | Mr(calc) | ppm   | Miss | Score | Expect | Rank | Unique | Peptide             |
|     | 175                                                                                            | 409.7606 | 817.5066 | 817.5062 | 0.49  | 0    | 23    | 0.016  | 1    | U      | R.VAIQFLK.D         |
| 14. | MTUS2_MOUSE Mass: 147266 Score: 23 Matches: 1(1) Sequences: 1(1) emPAI: 0.03                   |          |          |          |       |      |       |        |      |        |                     |
|     | Microtubule-associated tumor suppressor candidate 2 homolog OS=Mus musculus GN=Mtus2 PE=1 SV=1 |          |          |          |       |      |       |        |      |        |                     |
|     | Query                                                                                          | Observed | Mr(expt) | Mr(calc) | ppm   | Miss | Score | Expect | Rank | Unique | Peptide             |
|     | 168                                                                                            | 407.2452 | 812.4759 | 812.4756 | 0.42  | 0    | 23    | 0.013  | 1    | U      | K.KPAVSSPK.R        |
| 15. | MCM10_MOUSE Mass: 98344 Score: 23 Matches: 3(3) Sequences: 1(1) emPAI: 0.04                    |          |          |          |       |      |       |        |      |        |                     |
|     | Protein MCM10 homolog OS=Mus musculus GN=Mcm10 PE=1 SV=1                                       |          |          |          |       |      |       |        |      |        |                     |
|     | Query                                                                                          | Observed | Mr(expt) | Mr(calc) | ppm   | Miss | Score | Expect | Rank | Unique | Peptide             |
|     | 237                                                                                            | 428.2685 | 854.5224 | 854.5225 | -0.11 | 1    | 18    | 0.026  | 1    | U      | R.LPQIKEK.M 235 236 |
| 16. | APOB_MOUSE Mass: 509113 Score: 22 Matches: 1(1) Sequences: 1(1) emPAI: 0.01                    |          |          |          |       |      |       |        |      |        |                     |
|     | Apolipoprotein B-100 OS=Mus musculus GN=Apob PE=1 SV=1                                         |          |          |          |       |      |       |        |      |        |                     |
|     | Query                                                                                          | Observed | Mr(expt) | Mr(calc) | ppm   | Miss | Score | Expect | Rank | Unique | Peptide             |
|     | 43                                                                                             | 364.2265 | 726.4385 | 726.4388 | -0.44 | 0    | 22    | 0.007  | 1    | U      | K.GVVSIPR.L         |
| 17. | RASA3_MOUSE Mass: 95926 Score: 20 Matches: 1(1) Sequences: 1(1) emPAI: 0.05                    |          |          |          |       |      |       |        |      |        |                     |
|     | Ras GTPase-activating protein 3 OS=Mus musculus GN=Rasa3 PE=1 SV=2                             |          |          |          |       |      |       |        |      |        |                     |
|     | Query                                                                                          | Observed | Mr(expt) | Mr(calc) | ppm   | Miss | Score | Expect | Rank | Unique | Peptide             |
|     | 85                                                                                             | 379.7421 | 757.4696 | 757.4698 | -0.14 | 1    | 20    | 0.032  | 1    | U      | R.IKIGEAK.N         |
| 18. | RABL6_MOUSE Mass: 79782 Score: 20 Matches: 1(1) Sequences: 1(1) emPAI: 0.05                    |          |          |          |       |      |       |        |      |        |                     |
|     | Rab-like protein 6 OS=Mus musculus GN=Rabl6 PE=1 SV=2                                          |          |          |          |       |      |       |        |      |        |                     |
|     | Query                                                                                          | Observed | Mr(expt) | Mr(calc) | ppm   | Miss | Score | Expect | Rank | Unique | Peptide             |
|     | 263                                                                                            | 431.6987 | 861.3828 | 861.3828 | 0.06  | 1    | 20    | 0.026  | 1    | U      | K.EEGKEDR.K         |
| 19. | AKAP4_MOUSE Mass: 93735 Score: 20 Matches: 1(1) Sequences: 1(1) emPAI: 0.05                    |          |          |          |       |      |       |        |      |        |                     |
|     | A-kinase anchor protein 4 OS=Mus musculus GN=Akap4 PE=1 SV=1                                   |          |          |          |       |      |       |        |      |        |                     |
|     | Query                                                                                          | Observed | Mr(expt) | Mr(calc) | ppm   | Miss | Score | Expect | Rank | Unique | Peptide             |
|     | 71                                                                                             | 372.2184 | 742.4222 | 742.4225 | -0.37 | 0    | 20    | 0.021  | 1    | U      | K.LPEVSAK.A         |



|     |                                                                                     |          |          |          |       |      |       |        |      |        |             |
|-----|-------------------------------------------------------------------------------------|----------|----------|----------|-------|------|-------|--------|------|--------|-------------|
| 20. | DYSF_MOUSE Mass: 237759 Score: 18 Matches: 1(1) Sequences: 1(1) emPAI: 0.02         |          |          |          |       |      |       |        |      |        |             |
|     | Dysferlin OS=Mus musculus GN=Dysf PE=1 SV=3                                         |          |          |          |       |      |       |        |      |        |             |
|     | Query                                                                               | Observed | Mr(expt) | Mr(calc) | ppm   | Miss | Score | Expect | Rank | Unique | Peptide     |
|     | 103                                                                                 | 385.7168 | 769.4190 | 769.4195 | -0.62 | 1    | 18    | 0.017  | 1    | U      | K.RSSAPPR.K |
| 21. | MET14_MOUSE Mass: 52090 Score: 18 Matches: 1(1) Sequences: 1(1) emPAI: 0.09         |          |          |          |       |      |       |        |      |        |             |
|     | N6-adenosine-methyltransferase subunit METTL14 OS=Mus musculus GN=Mettl14 PE=1 SV=1 |          |          |          |       |      |       |        |      |        |             |
|     | Query                                                                               | Observed | Mr(expt) | Mr(calc) | ppm   | Miss | Score | Expect | Rank | Unique | Peptide     |
|     | 56                                                                                  | 370.7188 | 739.4229 | 739.4228 | 0.17  | 1    | 18    | 0.018  | 1    | U      | K.SPPPISK.S |
| 22. | STPG1_MOUSE Mass: 37475 Score: 17 Matches: 1(1) Sequences: 1(1) emPAI: 0.12         |          |          |          |       |      |       |        |      |        |             |
|     | O(6)-methylguanine-induced apoptosis 2 OS=Mus musculus GN=Stpg1 PE=2 SV=1           |          |          |          |       |      |       |        |      |        |             |
|     | Query                                                                               | Observed | Mr(expt) | Mr(calc) | ppm   | Miss | Score | Expect | Rank | Unique | Peptide     |
|     | 44                                                                                  | 364.2392 | 726.4638 | 726.4640 | -0.24 | 0    | 17    | 0.02   | 1    | U      | R.LGPIISK.N |
| 23. | CASP_MOUSE Mass: 77222 Score: 15 Matches: 1(1) Sequences: 1(1) emPAI: 0.06          |          |          |          |       |      |       |        |      |        |             |
|     | Protein CASP OS=Mus musculus GN=Cux1 PE=1 SV=2                                      |          |          |          |       |      |       |        |      |        |             |
|     | Query                                                                               | Observed | Mr(expt) | Mr(calc) | ppm   | Miss | Score | Expect | Rank | Unique | Peptide     |
|     | 101                                                                                 | 384.7524 | 767.4902 | 767.4905 | -0.39 | 0    | 15    | 0.029  | 1    | U      | K.QVAPLLK.S |
